# Supplementary material
Source: HighWire-hosted journal article supplement (https://ard.bmj.com/content/annrheumdis-2018-213882)
Supplement: inline-supplementary-material-3 [file inline-supplementary-material-3.xlsx]

## Sheet: Sheet1
miRNAs	FoldChange	log2FoldChange	pvalue	padj (FDR)
hsa-miR-127-3p	0.51383	-0.960637	7.79635e-09	1.10448e-06
hsa-miR-451a	2.2793	1.18859	5.13515e-09	1.10448e-06
hsa-miR-99a-5p	0.589237	-0.763081	6.8753e-09	1.10448e-06
hsa-miR-1247-5p	0.379289	-1.39863	1.438e-08	1.21891e-06
hsa-miR-144-3p	4.07217	2.0258	2.07742e-08	1.21891e-06
hsa-miR-146b-3p	0.472861	-1.08051	1.81992e-08	1.21891e-06
hsa-miR-182-5p	3.30493	1.72462	2.67616e-08	1.21891e-06
hsa-miR-328-3p	0.533692	-0.90592	2.71021e-08	1.21891e-06
hsa-miR-485-5p	0.525566	-0.928057	2.27688e-08	1.21891e-06
hsa-miR-95-3p	4.3462	2.11976	2.86801e-08	1.21891e-06
hsa-miR-21-5p	2.83517	1.50344	8.74904e-08	3.38031e-06
hsa-miR-206	4.9111	2.29605	1.00596e-07	3.56279e-06
hsa-miR-183-5p	2.60747	1.38265	3.16179e-07	1.03366e-05
hsa-miR-504-5p	0.367376	-1.44467	8.7255e-07	2.64881e-05
hsa-miR-125b-2-3p	0.691798	-0.531578	9.78051e-07	2.77114e-05
hsa-miR-874-3p	0.498193	-1.00522	1.05685e-06	2.80727e-05
hsa-miR-15b-3p	2.93635	1.55403	1.46548e-06	3.56016e-05
hsa-miR-582-3p	2.31643	1.2119	1.50783e-06	3.56016e-05
hsa-miR-3934-5p	1.94795	0.961959	1.88571e-06	4.21803e-05
hsa-miR-107	1.68904	0.756201	2.07514e-06	4.40967e-05
hsa-miR-142-5p	3.26972	1.70917	2.35598e-06	4.55132e-05
hsa-miR-340-5p	2.63408	1.3973	2.32586e-06	4.55132e-05
hsa-miR-125a-5p	0.616968	-0.696733	6.16857e-06	0.000112617
hsa-miR-143-3p	2.09923	1.06986	6.35956e-06	0.000112617
hsa-miR-10b-5p	1.98566	0.989615	8.2801e-06	0.000140762
hsa-miR-93-5p	1.72206	0.784136	9.57845e-06	0.000156571
hsa-miR-125b-5p	0.665333	-0.587852	1.14705e-05	0.000180555
hsa-miR-17-5p	1.78332	0.834564	1.36651e-05	0.000207417
hsa-miR-1-3p	4.53838	2.18218	1.68443e-05	0.000246855
hsa-miR-20a-5p	2.97247	1.57166	1.85744e-05	0.000263137
hsa-miR-16-2-3p	2.52113	1.33407	3.02463e-05	0.000414667
hsa-let-7f-5p	2.52888	1.3385	3.14795e-05	0.000418087
hsa-miR-144-5p	3.76132	1.91124	3.744e-05	0.000468
hsa-miR-29b-3p	2.36561	1.24221	3.70768e-05	0.000468
hsa-miR-27a-3p	1.80607	0.852852	4.08482e-05	0.000496013
hsa-miR-149-5p	0.577895	-0.79112	4.4949e-05	0.000521709
hsa-miR-671-3p	0.625058	-0.677937	4.54194e-05	0.000521709
hsa-miR-126-5p	3.07516	1.62066	5.75778e-05	0.000643963
hsa-miR-30a-5p	1.97275	0.980207	7.87929e-05	0.000839168
hsa-miR-499a-5p	3.41553	1.77211	7.89805e-05	0.000839168
hsa-miR-194-5p	2.40478	1.2659	9.13337e-05	0.000946751
hsa-miR-106b-5p	2.52264	1.33493	0.000102931	0.000994222
hsa-miR-16-5p	2.96142	1.56629	0.000101035	0.000994222
hsa-miR-423-3p	0.672442	-0.572518	0.000101041	0.000994222
hsa-miR-15a-5p	2.15621	1.10849	0.000111817	0.00105605
hsa-miR-548e-3p	2.25083	1.17045	0.000129308	0.00119469
hsa-miR-215-5p	2.15224	1.10584	0.000149152	0.00132062
hsa-miR-222-3p	1.49534	0.58047	0.000146742	0.00132062
hsa-miR-23b-5p	0.689568	-0.536236	0.000171002	0.00146123
hsa-miR-532-3p	0.517838	-0.949427	0.00017191	0.00146123
hsa-miR-148a-5p	0.633742	-0.658032	0.000190153	0.00155755
hsa-miR-363-3p	1.89704	0.923751	0.000190571	0.00155755
hsa-miR-101-3p	2.02019	1.01449	0.000199721	0.00157188
hsa-miR-192-5p	1.44682	0.532883	0.000198343	0.00157188
hsa-miR-24-2-5p	1.32	0.400533	0.000234654	0.00179221
hsa-miR-374a-3p	2.52475	1.33614	0.00023615	0.00179221
hsa-miR-98-5p	2.03692	1.02639	0.000268077	0.00199882
hsa-miR-30e-5p	1.93159	0.949792	0.000304024	0.00222776
hsa-miR-106b-3p	1.33337	0.415078	0.000322856	0.00232566
hsa-miR-543	0.435064	-1.2007	0.000361319	0.00255934
hsa-miR-374b-5p	2.57738	1.36591	0.000397332	0.0027599
hsa-miR-652-3p	1.53514	0.618369	0.000402621	0.0027599
hsa-miR-23a-3p	1.48288	0.568401	0.000570262	0.00380532
hsa-miR-486-5p	1.54805	0.630454	0.000573037	0.00380532
hsa-miR-382-5p	0.694507	-0.525939	0.000593429	0.00388011
hsa-miR-134-5p	0.643078	-0.636935	0.000633899	0.00408192
hsa-miR-370-3p	0.593841	-0.751851	0.00072074	0.00457186
hsa-miR-584-5p	2.10338	1.07271	0.000740779	0.00462987
hsa-miR-19b-3p	1.70483	0.769632	0.000774466	0.00470517
hsa-miR-7-5p	1.94213	0.957639	0.00077497	0.00470517
hsa-miR-99a-3p	0.562903	-0.829043	0.000799916	0.00478823
hsa-let-7e-5p	1.76894	0.822885	0.000909511	0.00536864
hsa-miR-155-5p	1.81943	0.863488	0.000945325	0.00549097
hsa-miR-27a-5p	1.43637	0.522432	0.000956075	0.00549097
hsa-miR-126-3p	2.00898	1.00646	0.00105665	0.0059877
hsa-miR-409-5p	0.65667	-0.606761	0.00109949	0.00614847
hsa-miR-20b-5p	2.2674	1.18104	0.0011187	0.00617465
hsa-miR-329-3p	0.434282	-1.20329	0.00114083	0.00621604
hsa-miR-151a-3p	1.39588	0.481178	0.00120565	0.00648611
hsa-miR-10a-5p	1.76618	0.820633	0.00143321	0.0076139
hsa-miR-361-5p	1.88277	0.912858	0.00151848	0.00796736
hsa-miR-185-5p	1.38143	0.466164	0.00170807	0.0088528
hsa-miR-4791	2.15633	1.10858	0.00178127	0.00912096
hsa-miR-582-5p	1.96522	0.97469	0.00192126	0.00972064
hsa-miR-31-5p	1.64896	0.721554	0.00197128	0.0098564
hsa-miR-133b	2.33753	1.22498	0.00202035	0.00998427
hsa-miR-1291	0.641666	-0.640106	0.00205187	0.0100235
hsa-miR-221-5p	1.70029	0.765781	0.0021173	0.0102256
hsa-miR-223-5p	2.28137	1.1899	0.00226155	0.0107995
hsa-let-7a-5p	1.87418	0.906258	0.00276319	0.0129952
hsa-miR-320c	0.614426	-0.702688	0.0027825	0.0129952
hsa-miR-196a-5p	1.97524	0.982031	0.00285067	0.0130519
hsa-miR-26b-5p	1.81215	0.857699	0.00285607	0.0130519
hsa-miR-25-3p	1.51199	0.596446	0.00297812	0.0134649
hsa-miR-140-3p	0.80548	-0.31208	0.00307394	0.0136086
hsa-miR-148b-5p	1.50126	0.586174	0.00306436	0.0136086
hsa-miR-92a-3p	1.7281	0.789189	0.00331227	0.0145125
hsa-miR-495-3p	0.663366	-0.592124	0.00351265	0.0152334
hsa-miR-146a-5p	1.59804	0.676306	0.00371108	0.0159314
hsa-miR-152-3p	1.27165	0.346705	0.00408078	0.0173433
hsa-miR-30d-5p	1.443	0.529068	0.00425556	0.0179071
hsa-miR-409-3p	0.717323	-0.479306	0.00435737	0.0181557
hsa-miR-145-3p	1.73804	0.797463	0.00454121	0.018738
hsa-let-7a-3p	1.8782	0.909347	0.00501351	0.0204879
hsa-miR-6511b-3p	0.526639	-0.925113	0.0050686	0.0205158
hsa-miR-483-5p	0.517825	-0.949463	0.00526129	0.0210948
hsa-miR-320d	0.624649	-0.678883	0.00535412	0.0212664
hsa-miR-29c-3p	1.57509	0.65543	0.00574997	0.0223927
hsa-miR-455-3p	0.684577	-0.546715	0.00579576	0.0223927
hsa-miR-574-5p	1.20106	0.264303	0.00573756	0.0223927
hsa-miR-193b-3p	0.738394	-0.437537	0.00589245	0.0225148
hsa-miR-421	1.68676	0.754251	0.00593331	0.0225148
hsa-miR-374a-5p	2.2909	1.19592	0.006481	0.0243755
hsa-miR-100-5p	1.27086	0.345808	0.00718036	0.0267689
hsa-miR-133a-3p	1.7627	0.817791	0.00730807	0.0267753
hsa-miR-197-3p	0.652599	-0.615732	0.00730416	0.0267753
hsa-miR-331-3p	0.663806	-0.591166	0.00739001	0.026844
hsa-miR-4429	0.584587	-0.774511	0.00777677	0.0280096
hsa-miR-3615	0.750719	-0.413654	0.00838039	0.02993
hsa-miR-185-3p	1.47808	0.563722	0.00855964	0.0303154
hsa-miR-320b	0.656021	-0.608186	0.00883557	0.0307796
hsa-miR-651-5p	1.9237	0.943883	0.00876579	0.0307796
hsa-miR-30b-5p	1.53501	0.618245	0.00895114	0.0309287
hsa-miR-320a	0.657888	-0.604087	0.00961245	0.0329459
hsa-miR-320e	0.628748	-0.669446	0.00978829	0.0332802
hsa-miR-483-3p	0.486484	-1.03954	0.0100061	0.0337236
hsa-miR-493-3p	0.613674	-0.704455	0.0100774	0.0337236
hsa-let-7g-5p	1.52676	0.610474	0.010633	0.0353047
hsa-miR-210-3p	0.682853	-0.550354	0.0108504	0.0357473
hsa-miR-221-3p	1.30368	0.382589	0.0110258	0.036046
hsa-miR-339-3p	0.754666	-0.40609	0.0114029	0.0369942
hsa-miR-339-5p	0.73	-0.454031	0.0115354	0.0371404
hsa-miR-32-5p	2.54982	1.35039	0.0130656	0.041366
hsa-miR-335-5p	2.08529	1.06025	0.0130436	0.041366
hsa-miR-487a-5p	0.444731	-1.169	0.0131398	0.041366
hsa-miR-433-3p	0.673827	-0.569549	0.0142007	0.0440533
hsa-miR-502-3p	0.751785	-0.411608	0.0141245	0.0440533
hsa-miR-1247-3p	0.650695	-0.619946	0.0146599	0.0448813
hsa-miR-140-5p	1.39022	0.475313	0.0147844	0.0448813
hsa-miR-335-3p	1.8092	0.855353	0.0147717	0.0448813
hsa-miR-6511a-3p	0.472823	-1.08063	0.0151578	0.0456885
hsa-miR-486-3p	1.63207	0.706706	0.0165658	0.0495806
