# Supplementary material
Source: HighWire-hosted journal article supplement (https://ard.bmj.com/content/annrheumdis-2018-213882)
Supplement: inline-supplementary-material-9 [file inline-supplementary-material-9.xlsx]

## Sheet: Sheet1
miRNA	Genes	r	pval(Correlation)	miRNA_FC	miRNA_padj_FDR	Genes_FC	Genes_padj_FDR	TargetScan CTScore	miTG-score	Experiments	method	References..PMID.
hsa-let-7a-5p	SPATA6	-0.583572	0.00548359	1.87418	0.0129952	0.766481	0.00213921	#N/A	0.642	#N/A	#N/A	#N/A
hsa-let-7a-5p	SPTSSB	-0.515999	0.0166438	1.87418	0.0129952	0.400847	4.07728e-07	#N/A	0.623	#N/A	#N/A	#N/A
hsa-let-7a-5p	CHRDL2	-0.513867	0.0171772	1.87418	0.0129952	0.128329	7.06686e-09	#N/A	0.524	#N/A	#N/A	#N/A
hsa-let-7e-5p	RPS6KA5	-0.586182	0.00522841	1.76894	0.00536864	0.750037	0.0272182	#N/A	#N/A	#N/A	HITS-CLIP	#N/A
hsa-let-7e-5p	SPATA6	-0.622972	0.00255598	1.76894	0.00536864	0.766481	0.00213921	#N/A	0.589	#N/A	#N/A	#N/A
hsa-let-7e-5p	NLGN1	-0.535967	0.0122669	1.76894	0.00536864	0.605367	0.0144535	#N/A	0.453	#N/A	#N/A	#N/A
hsa-let-7e-5p	SNX18	-0.640345	0.0017665	1.76894	0.00536864	0.87518	0.0351975	#N/A	0.45	#N/A	#N/A	#N/A
hsa-let-7f-5p	RPS6KA5	-0.620493	0.00268963	2.52888	0.000418087	0.750037	0.0272182	#N/A	#N/A	#N/A	HITS-CLIP	#N/A
hsa-let-7f-5p	PDE8B	-0.509444	0.0183276	2.52888	0.000418087	0.655116	0.0214091	#N/A	0.646	#N/A	#N/A	#N/A
hsa-let-7f-5p	COL9A1	-0.542292	0.0110947	2.52888	0.000418087	0.415529	0.0042695	-0.214	0.631	#N/A	#N/A	#N/A
hsa-let-7f-5p	SPATA6	-0.648503	0.00147371	2.52888	0.000418087	0.766481	0.00213921	#N/A	0.628	#N/A	#N/A	#N/A
hsa-let-7f-5p	SPTSSB	-0.54254	0.0110506	2.52888	0.000418087	0.400847	4.07728e-07	#N/A	0.625	#N/A	#N/A	#N/A
hsa-let-7f-5p	SNX18	-0.555324	0.00896612	2.52888	0.000418087	0.87518	0.0351975	#N/A	0.453	#N/A	#N/A	#N/A
hsa-let-7g-5p	RPS6KA5	-0.51419	0.0170955	1.52676	0.0353047	0.750037	0.0272182	#N/A	#N/A	#N/A	HITS-CLIP	#N/A
hsa-let-7g-5p	SPATA6	-0.596134	0.00434405	1.52676	0.0353047	0.766481	0.00213921	#N/A	0.636	#N/A	#N/A	#N/A
hsa-miR-100-5p	ST5	-0.524719	0.0145992	1.27086	0.0267689	0.745744	0.000290025	-0.376	#N/A	#N/A	#N/A	#N/A
hsa-miR-101-3p	MTSS1L	-0.608267	0.0034376	2.02019	0.00157188	0.687607	0.00144392	#N/A	#N/A	Sequencing	HITS-CLIP	20371350
hsa-miR-101-3p	ZFP64	-0.509525	0.0183059	2.02019	0.00157188	0.869012	0.0153132	#N/A	#N/A	#N/A	PAR-CLIP	#N/A
hsa-miR-107	PRKACA	-0.500105	0.0209604	1.68904	4.40967e-05	0.873764	0.0393304	#N/A	#N/A	#N/A	HITS-CLIP	#N/A
hsa-miR-107	SH3BP4	-0.553674	0.00921552	1.68904	4.40967e-05	0.768064	0.00254086	-0.419	#N/A	#N/A	HITS-CLIP	#N/A
hsa-miR-10a-5p	CSGALNACT1	-0.684426	0.000621113	1.76618	0.0076139	0.820912	0.0484957	#N/A	#N/A	HITS-CLIP	#N/A	19536157
hsa-miR-10a-5p	NR1D1	-0.657074	0.00121131	1.76618	0.0076139	0.791031	0.0364771	#N/A	#N/A	#N/A	HITS-CLIP	#N/A
hsa-miR-10a-5p	TGFBR3	-0.541485	0.0112389	1.76618	0.0076139	0.771517	0.000185281	#N/A	#N/A	#N/A	HITS-CLIP	#N/A
hsa-miR-10a-5p	TNS3	-0.61166	0.00321451	1.76618	0.0076139	0.772924	0.0126679	#N/A	#N/A	#N/A	HITS-CLIP	#N/A
hsa-miR-10a-5p	IRS1	-0.63412	0.00202161	1.76618	0.0076139	0.586973	2.02993e-06	-0.02	#N/A	#N/A	#N/A	#N/A
hsa-miR-10a-5p	THRA	-0.640658	0.00175442	1.76618	0.0076139	0.863035	0.0313701	-0.074	#N/A	#N/A	#N/A	#N/A
hsa-miR-10a-5p	MTSS1L	-0.616054	0.00294364	1.76618	0.0076139	0.687607	0.00144392	-0.171	#N/A	#N/A	#N/A	#N/A
hsa-miR-10a-5p	SERTAD4	-0.719041	0.000239745	1.76618	0.0076139	0.806259	0.0410381	-0.234	#N/A	#N/A	#N/A	#N/A
hsa-miR-10b-5p	TBC1D20	-0.516755	0.0164579	1.98566	0.000140762	0.915933	0.0394514	#N/A	#N/A	#N/A	HITS-CLIP	#N/A
hsa-miR-10b-5p	SUFU	-0.526087	0.0142977	1.98566	0.000140762	0.787315	0.000303105	-0.1	#N/A	#N/A	#N/A	#N/A
hsa-miR-10b-5p	IGDCC4	-0.594436	0.00448546	1.98566	0.000140762	0.700214	0.00445643	-0.329	#N/A	#N/A	#N/A	#N/A
hsa-miR-10b-5p	SNX18	-0.509399	0.0183397	1.98566	0.000140762	0.87518	0.0351975	-0.404	#N/A	#N/A	#N/A	#N/A
hsa-miR-133a-3p	CFH	-0.515152	0.016854	1.7627	0.0267753	0.538186	0.000216087	#N/A	#N/A	#N/A	HITS-CLIP	#N/A
hsa-miR-1-3p	FHDC1	-0.500686	0.0207882	4.53838	0.000246855	0.746845	0.0479985	#N/A	#N/A	Microarray	Microarrays	18668037
hsa-miR-1-3p	NINJ1	-0.537464	0.0119809	4.53838	0.000246855	0.838861	0.027953	-0.287	#N/A	#N/A	#N/A	#N/A
hsa-miR-140-5p	RGS4	-0.721869	0.000220471	1.39022	0.0448813	0.538494	0.0494359	#N/A	#N/A	#N/A	HITS-CLIP	#N/A
hsa-miR-142-5p	HTR2A	-0.502183	0.0203499	3.26972	4.55132e-05	0.652115	0.0151025	-0.024	#N/A	#N/A	#N/A	#N/A
hsa-miR-143-3p	AMIGO1	-0.704358	0.000364822	2.09923	0.000112617	0.786376	0.0162334	#N/A	#N/A	#N/A	HITS-CLIP	#N/A
hsa-miR-143-3p	GPT2	-0.581971	0.00564512	2.09923	0.000112617	0.829638	0.0275851	#N/A	#N/A	#N/A	HITS-CLIP	#N/A
hsa-miR-143-3p	SRRM1	-0.658084	0.00118319	2.09923	0.000112617	0.82933	0.0197945	#N/A	#N/A	#N/A	HITS-CLIP	#N/A
hsa-miR-143-3p	TFDP2	-0.529261	0.0136176	2.09923	0.000112617	0.852241	0.0226817	#N/A	#N/A	#N/A	HITS-CLIP	#N/A
hsa-miR-143-3p	SMAD3	-0.676203	0.000764681	2.09923	0.000112617	0.836159	0.0283209	-0.03	#N/A	Microarray	#N/A	22942087
hsa-miR-143-3p	TUB	-0.565349	0.00756706	2.09923	0.000112617	0.760112	0.0083088	-0.03	#N/A	#N/A	#N/A	#N/A
hsa-miR-143-3p	DLG3	-0.547224	0.0102454	2.09923	0.000112617	0.88205	0.0274555	-0.04	#N/A	#N/A	#N/A	#N/A
hsa-miR-143-3p	PDE3B	-0.508935	0.0184639	2.09923	0.000112617	0.333817	4.44397e-07	-0.044	#N/A	#N/A	#N/A	#N/A
hsa-miR-143-3p	THRA	-0.563897	0.0077579	2.09923	0.000112617	0.863035	0.0313701	-0.064	#N/A	#N/A	#N/A	#N/A
hsa-miR-143-3p	MPPED1	-0.652882	0.0013342	2.09923	0.000112617	0.484483	0.000606062	-0.107	#N/A	#N/A	#N/A	#N/A
hsa-miR-143-3p	ALDH1L1	-0.613602	0.00309229	2.09923	0.000112617	0.493023	7.23794e-07	-0.109	#N/A	#N/A	#N/A	#N/A
hsa-miR-143-3p	GHR	-0.600359	0.00400823	2.09923	0.000112617	0.70146	0.00271656	-0.111	#N/A	#N/A	#N/A	#N/A
hsa-miR-143-3p	EPS8	-0.604239	0.00371913	2.09923	0.000112617	0.787591	0.0289471	-0.146	#N/A	#N/A	#N/A	#N/A
hsa-miR-143-3p	TNS3	-0.661577	0.0010901	2.09923	0.000112617	0.772924	0.0126679	-0.234	#N/A	#N/A	#N/A	#N/A
hsa-miR-143-3p	GID8	-0.695609	0.000463148	2.09923	0.000112617	0.918692	0.0324828	-0.238	#N/A	#N/A	#N/A	#N/A
hsa-miR-143-3p	DCAKD	-0.717657	0.000249693	2.09923	0.000112617	0.846458	0.0261945	-0.276	#N/A	#N/A	#N/A	#N/A
hsa-miR-152-3p	BTN3A1	-0.505483	0.0194096	1.27165	0.0173433	0.732202	0.016908	#N/A	#N/A	#N/A	HITS-CLIP	#N/A
hsa-miR-152-3p	ARHGEF17	-0.530781	0.0133015	1.27165	0.0173433	0.763335	0.0372429	-0.113	#N/A	#N/A	HITS-CLIP	#N/A
hsa-miR-152-3p	RUNX1T1	-0.50485	0.0195874	1.27165	0.0173433	0.721045	0.00687611	-0.155	#N/A	#N/A	#N/A	#N/A
hsa-miR-15a-5p	CDS1	-0.553755	0.0092032	2.15621	0.00105605	0.591044	0.0410683	#N/A	#N/A	#N/A	HITS-CLIP	#N/A
hsa-miR-16-5p	CDS1	-0.569213	0.0070783	2.96142	0.000994222	0.591044	0.0410683	#N/A	#N/A	#N/A	HITS-CLIP	#N/A
hsa-miR-16-5p	ZNF469	-0.527913	0.0139032	2.96142	0.000994222	0.650983	0.0251411	-0.103	#N/A	#N/A	#N/A	#N/A
hsa-miR-182-5p	PRKACB	-0.555422	0.00895149	3.30493	1.21891e-06	0.822405	0.03017	-0.168 / -0.34	#N/A	#N/A	PAR-CLIP	#N/A
hsa-miR-182-5p	RIMBP2	-0.522414	0.0151187	3.30493	1.21891e-06	0.740735	0.044009	-0.03	#N/A	#N/A	#N/A	#N/A
hsa-miR-192-5p	ZNF385B	-0.518412	0.0160563	1.44682	0.00157188	0.654081	4.35745e-05	#N/A	#N/A	Microarray	Microarrays	19074876
hsa-miR-192-5p	PRKACB	-0.522186	0.0151709	1.44682	0.00157188	0.822405	0.03017	-0.088	#N/A	#N/A	#N/A	#N/A
hsa-miR-197-3p	FDFT1	-0.564393	0.00769223	0.652599	0.0267753	1.16501	0.0115069	#N/A	#N/A	#N/A	HITS-CLIP	#N/A
hsa-miR-197-3p	TMEM154	-0.625491	0.00242591	0.652599	0.0267753	1.55241	3.49404e-05	#N/A	#N/A	PAR-CLIP//HITS-CLIP	#N/A	21572407 / 23446348
hsa-miR-19b-3p	ZNF469	-0.594577	0.00447361	1.70483	0.00470517	0.650983	0.0251411	-0.136	#N/A	#N/A	#N/A	#N/A
hsa-miR-206	NINJ1	-0.623093	0.00254961	4.9111	3.56279e-06	0.838861	0.027953	-0.287	0.886 / 0.532	#N/A	#N/A	#N/A
hsa-miR-206	L3MBTL4	-0.532519	0.0129472	4.9111	3.56279e-06	0.45082	5.23764e-06	#N/A	0.685 /0.581	#N/A	#N/A	#N/A
hsa-miR-206	PLCD3	-0.549042	0.0099461	4.9111	3.56279e-06	0.682284	0.0001046	#N/A	0.543/0.497	#N/A	#N/A	#N/A
hsa-miR-206	FIBIN	-0.500025	0.020984	4.9111	3.56279e-06	0.774597	0.0219436	#N/A	0.536 /0.464	#N/A	#N/A	#N/A
hsa-miR-206	C22orf39	-0.518991	0.0159177	4.9111	3.56279e-06	0.854686	0.0306933	#N/A	0.924	#N/A	#N/A	#N/A
hsa-miR-206	RHNO1	-0.511902	0.017681	4.9111	3.56279e-06	0.820858	0.00173694	#N/A	0.784	#N/A	#N/A	#N/A
hsa-miR-206	CYTL1	-0.639482	0.00180015	4.9111	3.56279e-06	0.725549	0.0431444	#N/A	0.617	#N/A	#N/A	#N/A
hsa-miR-206	ACSF2	-0.507133	0.018953	4.9111	3.56279e-06	0.704457	0.00546931	#N/A	0.598	#N/A	#N/A	#N/A
hsa-miR-206	GPM6A	-0.594461	0.0044834	4.9111	3.56279e-06	0.577659	0.0151579	#N/A	0.598	#N/A	#N/A	#N/A
hsa-miR-206	CFH	-0.579654	0.00588575	4.9111	3.56279e-06	0.538186	0.000216087	#N/A	0.56	#N/A	#N/A	#N/A
hsa-miR-206	IFIH1	-0.500049	0.020977	4.9111	3.56279e-06	0.717276	0.00651552	#N/A	0.489	#N/A	#N/A	#N/A
hsa-miR-206	COLEC12	-0.543975	0.0107987	4.9111	3.56279e-06	0.586111	3.33175e-06	#N/A	0.471	#N/A	#N/A	#N/A
hsa-miR-20a-5p	SRGAP1	-0.509285	0.0183702	2.97247	0.000263137	0.725458	0.0295877	-0.185	0.957	#N/A	#N/A	#N/A
hsa-miR-20a-5p	SH3BP4	-0.591117	0.0047729	2.97247	0.000263137	0.768064	0.00254086	#N/A	0.568	#N/A	#N/A	#N/A
hsa-miR-21-5p	CDS1	-0.552741	0.00935905	2.83517	3.38031e-06	0.591044	0.0410683	#N/A	#N/A	PAR-CLIP	HITS-CLIP	#N/A
hsa-miR-21-5p	GID8	-0.628614	0.0022724	2.83517	3.38031e-06	0.918692	0.0324828	#N/A	#N/A	#N/A	HITS-CLIP	#N/A
hsa-miR-21-5p	LURAP1L	-0.546233	0.0104116	2.83517	3.38031e-06	0.634681	0.000209922	#N/A	#N/A	#N/A	HITS-CLIP	#N/A
hsa-miR-21-5p	OSBPL1A	-0.530441	0.0133716	2.83517	3.38031e-06	0.803756	0.013093	#N/A	#N/A	Microarray	Microarrays	18591254
hsa-miR-21-5p	SDC2	-0.629366	0.00223668	2.83517	3.38031e-06	0.848845	0.00552062	#N/A	#N/A	#N/A	HITS-CLIP	#N/A
hsa-miR-21-5p	TFDP2	-0.545696	0.0105027	2.83517	3.38031e-06	0.852241	0.0226817	#N/A	#N/A	#N/A	HITS-CLIP	#N/A
hsa-miR-21-5p	TGFBR3	-0.50701	0.0189866	2.83517	3.38031e-06	0.771517	0.000185281	#N/A	#N/A	Luciferase reporter assay//qRT-PCR/ Microarray	#N/A	18829576/19253296
hsa-miR-21-5p	TMED4	-0.644802	0.00160099	2.83517	3.38031e-06	0.864947	0.000290025	#N/A	#N/A	#N/A	HITS-CLIP	#N/A
hsa-miR-21-5p	TNS3	-0.524585	0.014629	2.83517	3.38031e-06	0.772924	0.0126679	#N/A	#N/A	Microarray	Microarrays	18591254
hsa-miR-21-5p	CRIM1	-0.545183	0.0105901	2.83517	3.38031e-06	0.563581	1.91228e-07	-0.02	#N/A	#N/A	#N/A	#N/A
hsa-miR-21-5p	FMN1	-0.570007	0.00698106	2.83517	3.38031e-06	0.74803	0.00507133	-0.099	#N/A	#N/A	#N/A	#N/A
hsa-miR-221-3p	C1orf198	-0.567495	0.00729231	1.30368	0.036046	0.819446	0.0144302	#N/A	#N/A	#N/A	HITS-CLIP	#N/A
hsa-miR-222-3p	RAB40B	-0.513571	0.0172523	1.49534	0.00132062	0.84348	0.0205555	#N/A	0.465	#N/A	#N/A	#N/A
hsa-miR-23a-3p	MYD88	-0.562409	0.00795735	1.48288	0.00380532	0.87443	0.0383725	#N/A	#N/A	#N/A	HITS-CLIP	#N/A
hsa-miR-23a-3p	TOB2	-0.538218	0.0118387	1.48288	0.00380532	0.835255	0.00121534	#N/A	0.562	#N/A	HITS-CLIP	#N/A
hsa-miR-23a-3p	SH3BP4	-0.611515	0.00322378	1.48288	0.00380532	0.768064	0.00254086	#N/A	0.54	#N/A	#N/A	#N/A
hsa-miR-25-3p	ADCYAP1R1	-0.552478	0.00939984	1.51199	0.0134649	0.417348	0.00021486	#N/A	0.607 /0.461	#N/A	#N/A	#N/A
hsa-miR-25-3p	HTR2A	-0.632991	0.00207101	1.51199	0.0134649	0.652115	0.0151025	#N/A	0.605 / 0.494	#N/A	#N/A	#N/A
hsa-miR-25-3p	SNX18	-0.601032	0.00395678	1.51199	0.0134649	0.87518	0.0351975	#N/A	0.593	#N/A	#N/A	#N/A
hsa-miR-25-3p	ARHGEF16	-0.549359	0.00989452	1.51199	0.0134649	0.585215	0.0314537	#N/A	0.569	#N/A	#N/A	#N/A
hsa-miR-26b-5p	GSE1	-0.501748	0.0204764	1.81215	0.0130519	0.553249	2.82617e-05	#N/A	#N/A	#N/A	PAR-CLIP	#N/A
hsa-miR-26b-5p	TMEM30B	-0.529702	0.0135254	1.81215	0.0130519	0.804886	0.0111094	#N/A	#N/A	Microarray	Microarrays	19088304
hsa-miR-26b-5p	SSFA2	-0.502816	0.0201667	1.81215	0.0130519	0.784025	0.0206279	-0.135	0.91	#N/A	PAR-CLIP	#N/A
hsa-miR-26b-5p	PLBD2	-0.547442	0.010209	1.81215	0.0130519	0.809725	0.0489955	-0.09	0.719	#N/A	#N/A	#N/A
hsa-miR-26b-5p	ZFP64	-0.524448	0.0146595	1.81215	0.0130519	0.869012	0.0153132	#N/A	0.692	#N/A	#N/A	#N/A
hsa-miR-26b-5p	CDS1	-0.534145	0.0126226	1.81215	0.0130519	0.591044	0.0410683	#N/A	0.573	#N/A	PAR-CLIP	#N/A
hsa-miR-27a-3p	ZBED6CL	-0.520059	0.0156649	1.80607	0.000496013	0.70469	0.00625741	#N/A	#N/A	#N/A	HITS-CLIP	#N/A
hsa-miR-27a-3p	MORN4	-0.552397	0.00941241	1.80607	0.000496013	0.751844	0.00101965	#N/A	0.467	#N/A	#N/A	#N/A
hsa-miR-27a-3p	SCARA3	-0.545366	0.0105589	1.80607	0.000496013	0.800916	0.0195925	#N/A	0.456	#N/A	#N/A	#N/A
hsa-miR-27a-5p	PCDHB4	-0.505611	0.019374	1.43637	0.00549097	0.698014	0.000266599	#N/A	0.932	#N/A	#N/A	#N/A
hsa-miR-27a-5p	TNFSF13	-0.579533	0.00589855	1.43637	0.00549097	0.669385	9.01009e-05	#N/A	0.673	#N/A	#N/A	#N/A
hsa-miR-27a-5p	TMEM25	-0.549538	0.00986563	1.43637	0.00549097	0.882904	0.0308733	#N/A	0.559	#N/A	#N/A	#N/A
hsa-miR-27a-5p	CBX7	-0.532141	0.0130235	1.43637	0.00549097	0.762113	0.00212833	#N/A	0.532	#N/A	#N/A	#N/A
hsa-miR-27a-5p	WNK4	-0.554114	0.00914849	1.43637	0.00549097	0.593788	0.00354027	#N/A	0.5	#N/A	#N/A	#N/A
hsa-miR-27a-5p	TPD52L1	-0.577781	0.00608649	1.43637	0.00549097	0.775971	0.00178056	#N/A	0.46	#N/A	#N/A	#N/A
hsa-miR-27a-5p	AQP6	-0.533446	0.0127613	1.43637	0.00549097	0.503705	4.78724e-07	#N/A	0.451	#N/A	#N/A	#N/A
hsa-miR-29b-3p	ZNF469	-0.57385	0.00652622	2.36561	0.000468	0.650983	0.0251411	-0.414	0.974	#N/A	#N/A	#N/A
hsa-miR-29b-3p	RGS4	-0.601738	0.00390346	2.36561	0.000468	0.538494	0.0494359	#N/A	0.486	#N/A	#N/A	#N/A
hsa-miR-30a-5p	ZNF469	-0.530679	0.0133225	1.97275	0.000839168	0.650983	0.0251411	#N/A	0.946/0.664	#N/A	#N/A	#N/A
hsa-miR-30a-5p	GLI2	-0.510361	0.0180842	1.97275	0.000839168	0.738922	0.0284299	-0.03 / -0.02	0.488/0.504	#N/A	#N/A	#N/A
hsa-miR-30a-5p	ADD1	-0.562916	0.00788892	1.97275	0.000839168	0.88315	0.00143357	#N/A	0.467 /0.512	#N/A	#N/A	#N/A
hsa-miR-30a-5p	IQCE	-0.589687	0.00490136	1.97275	0.000839168	0.839525	0.0240484	#N/A	0.766	#N/A	#N/A	#N/A
hsa-miR-30a-5p	SLC13A3	-0.560564	0.00821061	1.97275	0.000839168	0.714453	0.0131939	#N/A	0.717	#N/A	#N/A	#N/A
hsa-miR-30a-5p	SPRED2	-0.577826	0.00608159	1.97275	0.000839168	0.783636	0.00500002	#N/A	0.453	#N/A	#N/A	#N/A
hsa-miR-30b-5p	TNFRSF19	-0.51074	0.0179842	1.53501	0.0309287	0.632878	0.0101272	#N/A	0.463 /0.491	#N/A	#N/A	#N/A
hsa-miR-30b-5p	ZNF469	-0.582976	0.00554327	1.53501	0.0309287	0.650983	0.0251411	#N/A	0.712	#N/A	#N/A	#N/A
hsa-miR-30b-5p	TBC1D20	-0.598523	0.00415143	1.53501	0.0309287	0.915933	0.0394514	#N/A	0.497	#N/A	HITS-CLIP	#N/A
hsa-miR-30d-5p	TPP1	-0.514561	0.0170021	1.443	0.0179071	0.842545	0.00822	#N/A	0.504	#N/A	HITS-CLIP	#N/A
hsa-miR-30e-5p	IGDCC4	-0.601231	0.00394168	1.93159	0.00222776	0.700214	0.00445643	#N/A	0.463	#N/A	#N/A	#N/A
hsa-miR-31-5p	RRAGA	-0.636346	0.00192704	1.64896	0.0098564	0.897781	0.0188811	#N/A	#N/A	#N/A	Western Blot	#N/A
hsa-miR-320a	MANF	-0.63042	0.0021874	0.657888	0.0329459	1.40278	0.00611961	#N/A	#N/A	#N/A	HITS-CLIP	#N/A
hsa-miR-320a	RAB3IP	-0.509141	0.0184088	0.657888	0.0329459	1.37819	0.041766	#N/A	0.828	HITS-CLIP	PAR-CLIP	#N/A
hsa-miR-320a	CISD2	-0.631874	0.00212093	0.657888	0.0329459	1.21797	0.0380164	-0.068	0.688	#N/A	#N/A	#N/A
hsa-miR-320a	SLC50A1	-0.58004	0.0058451	0.657888	0.0329459	1.28973	0.0128476	#N/A	0.576	#N/A	#N/A	#N/A
hsa-miR-320a	HM13	-0.578734	0.00598367	0.657888	0.0329459	1.17719	0.0173647	#N/A	0.469	#N/A	#N/A	#N/A
hsa-miR-320a	POLR2L	-0.535705	0.0123175	0.657888	0.0329459	1.28548	0.0250659	#N/A	0.451	#N/A	#N/A	#N/A
hsa-miR-320b	MANF	-0.500437	0.0208616	0.656021	0.0307796	1.40278	0.00611961	#N/A	#N/A	#N/A	HITS-CLIP	#N/A
hsa-miR-320b	RAB3IP	-0.562039	0.00800769	0.656021	0.0307796	1.37819	0.041766	#N/A	0.827	#N/A	PAR-CLIP	#N/A
hsa-miR-320b	CISD2	-0.568806	0.0071285	0.656021	0.0307796	1.21797	0.0380164	-0.068	0.688	#N/A	#N/A	#N/A
hsa-miR-320c	MANF	-0.513323	0.0173154	0.614426	0.0129952	1.40278	0.00611961	#N/A	#N/A	#N/A	HITS-CLIP	#N/A
hsa-miR-320c	RAB3IP	-0.541671	0.0112055	0.614426	0.0129952	1.37819	0.041766	#N/A	0.822	#N/A	PAR-CLIP	#N/A
hsa-miR-320c	CISD2	-0.567568	0.00728315	0.614426	0.0129952	1.21797	0.0380164	-0.068	0.687	#N/A	#N/A	#N/A
hsa-miR-320d	MANF	-0.588724	0.00498946	0.624649	0.0212664	1.40278	0.00611961	#N/A	#N/A	#N/A	HITS-CLIP	#N/A
hsa-miR-320d	CISD2	-0.578339	0.00602616	0.624649	0.0212664	1.21797	0.0380164	-0.068	0.687	#N/A	#N/A	#N/A
hsa-miR-320d	SLC50A1	-0.531908	0.0130709	0.624649	0.0212664	1.28973	0.0128476	#N/A	0.578	#N/A	#N/A	#N/A
hsa-miR-320d	HM13	-0.512596	0.0175016	0.624649	0.0212664	1.17719	0.0173647	#N/A	0.473	#N/A	#N/A	#N/A
hsa-miR-320d	TIMMDC1	-0.633097	0.00206636	0.624649	0.0212664	1.21882	0.0236457	#N/A	0.465	#N/A	#N/A	#N/A
hsa-miR-320d	POLR2L	-0.522351	0.0151331	0.624649	0.0212664	1.28548	0.0250659	#N/A	0.455	#N/A	#N/A	#N/A
hsa-miR-320d	PSMD1	-0.546646	0.0103421	0.624649	0.0212664	1.31667	0.0142636	#N/A	0.453	#N/A	#N/A	#N/A
hsa-miR-320e	S100A4	-0.538291	0.011825	0.628748	0.0332802	1.82552	0.000278861	#N/A	#N/A	#N/A	HITS-CLIP	#N/A
hsa-miR-320e	UQCRC1	-0.535858	0.0122879	0.628748	0.0332802	1.32257	0.00191901	#N/A	#N/A	#N/A	HITS-CLIP	#N/A
hsa-miR-320e	TIMMDC1	-0.624322	0.00248556	0.628748	0.0332802	1.21882	0.0236457	#N/A	0.801	#N/A	#N/A	#N/A
hsa-miR-320e	SLC50A1	-0.599009	0.00411309	0.628748	0.0332802	1.28973	0.0128476	#N/A	0.688	#N/A	#N/A	#N/A
hsa-miR-320e	CISD2	-0.629355	0.00223719	0.628748	0.0332802	1.21797	0.0380164	#N/A	0.635	#N/A	#N/A	#N/A
hsa-miR-320e	SRPRB	-0.575214	0.00637081	0.628748	0.0332802	1.21125	0.0229053	#N/A	0.564	#N/A	#N/A	#N/A
hsa-miR-320e	HM13	-0.601156	0.00394739	0.628748	0.0332802	1.17719	0.0173647	#N/A	0.556	#N/A	#N/A	#N/A
hsa-miR-320e	SEC61A1	-0.503033	0.0201044	0.628748	0.0332802	1.13385	0.00191694	#N/A	0.509	#N/A	#N/A	#N/A
hsa-miR-320e	MANF	-0.653178	0.00132521	0.628748	0.0332802	1.40278	0.00611961	#N/A	0.495	#N/A	HITS-CLIP	#N/A
hsa-miR-320e	PHKG2	-0.5194	0.0158205	0.628748	0.0332802	1.22997	0.0316475	#N/A	0.477	#N/A	HITS-CLIP	#N/A
hsa-miR-320e	SUSD1	-0.54791	0.0101315	0.628748	0.0332802	1.40098	0.00565167	#N/A	0.472	#N/A	#N/A	#N/A
hsa-miR-329-3p	SLC22A4	-0.564375	0.00769459	0.434282	0.00621604	1.43459	0.00196407	#N/A	#N/A	HITS-CLIP	#N/A	23824327
hsa-miR-329-3p	WNT9A	-0.577689	0.00609658	0.434282	0.00621604	2.41553	9.36336e-08	#N/A	#N/A	HITS-CLIP	#N/A	23824327 / 22927820 / 24906430
hsa-miR-329-3p	FZD10	-0.576919	0.00618074	0.434282	0.00621604	1.72547	0.00682629	#N/A	0.635	#N/A	#N/A	#N/A
hsa-miR-329-3p	BMP6	-0.564433	0.00768704	0.434282	0.00621604	2.4283	1.5564e-09	#N/A	0.586	#N/A	#N/A	#N/A
hsa-miR-329-3p	SURF4	-0.546616	0.0103472	0.434282	0.00621604	1.18666	0.000457764	#N/A	0.564	#N/A	#N/A	#N/A
hsa-miR-329-3p	SPECC1	-0.602068	0.00387872	0.434282	0.00621604	1.54199	1.92008e-08	#N/A	0.553	#N/A	#N/A	#N/A
hsa-miR-329-3p	GLRB	-0.500272	0.0209108	0.434282	0.00621604	1.3892	0.00699714	#N/A	0.519	#N/A	#N/A	#N/A
hsa-miR-329-3p	FZD1	-0.603808	0.0037504	0.434282	0.00621604	1.37312	0.00500002	#N/A	0.508	#N/A	#N/A	#N/A
hsa-miR-329-3p	PLAT	-0.590649	0.00481469	0.434282	0.00621604	1.44294	0.003013	-0.135	0.486	#N/A	#N/A	#N/A
hsa-miR-329-3p	PREP	-0.552519	0.00939336	0.434282	0.00621604	1.18639	0.0186031	#N/A	0.48	#N/A	#N/A	#N/A
hsa-miR-329-3p	GDF6	-0.670248	0.000885468	0.434282	0.00621604	1.5848	0.0318986	#N/A	0.46	#N/A	#N/A	#N/A
hsa-miR-331-3p	ITGA5	-0.546293	0.0104015	0.663806	0.026844	1.44798	1.29167e-08	#N/A	#N/A	#N/A	HITS-CLIP	#N/A
hsa-miR-331-3p	SURF4	-0.534443	0.012564	0.663806	0.026844	1.18666	0.000457764	#N/A	#N/A	#N/A	HITS-CLIP	#N/A
hsa-miR-331-3p	SYBU	-0.540578	0.0114028	0.663806	0.026844	1.25524	0.00204396	#N/A	#N/A	#N/A	HITS-CLIP	#N/A
hsa-miR-335-3p	ADAMTSL4	-0.542189	0.011113	1.8092	0.0448813	0.749564	0.0161031	#N/A	0.465	#N/A	#N/A	#N/A
hsa-miR-339-5p	BMPR1B	-0.528519	0.0137744	0.73	0.0371404	3.20461	1.27502e-07	#N/A	0.805	#N/A	#N/A	#N/A
hsa-miR-339-5p	HSD3B7	-0.55473	0.00905531	0.73	0.0371404	1.43885	0.0264575	#N/A	0.616	#N/A	#N/A	#N/A
hsa-miR-339-5p	SMOC1	-0.595244	0.00441776	0.73	0.0371404	1.46344	5.80064e-06	#N/A	0.592	#N/A	#N/A	#N/A
hsa-miR-339-5p	POMT2	-0.502169	0.0203539	0.73	0.0371404	1.41287	3.45766e-08	-0.136	0.575	#N/A	#N/A	#N/A
hsa-miR-339-5p	GDF6	-0.593085	0.00460069	0.73	0.0371404	1.5848	0.0318986	#N/A	0.57	#N/A	#N/A	#N/A
hsa-miR-339-5p	PKN3	-0.605265	0.00364571	0.73	0.0371404	1.43795	0.000103568	#N/A	0.542	#N/A	#N/A	#N/A
hsa-miR-339-5p	CXorf40A	-0.504447	0.0197009	0.73	0.0371404	1.19667	0.0196634	#N/A	0.535	#N/A	#N/A	#N/A
hsa-miR-339-5p	EVL	-0.532039	0.0130442	0.73	0.0371404	1.28448	0.0308074	#N/A	0.528	#N/A	#N/A	#N/A
hsa-miR-339-5p	TTC9	-0.618911	0.00277798	0.73	0.0371404	2.37633	2.30221e-07	#N/A	0.519	#N/A	#N/A	#N/A
hsa-miR-339-5p	ITGA5	-0.567668	0.00727056	0.73	0.0371404	1.44798	1.29167e-08	#N/A	0.493	#N/A	#N/A	#N/A
hsa-miR-339-5p	ITGB4	-0.513822	0.0171885	0.73	0.0371404	1.38355	0.0350955	#N/A	0.479	#N/A	#N/A	#N/A
hsa-miR-339-5p	SLC7A5	-0.508472	0.0185886	0.73	0.0371404	1.98581	6.24727e-08	#N/A	0.474	#N/A	#N/A	#N/A
hsa-miR-339-5p	C3orf52	-0.664178	0.00102489	0.73	0.0371404	2.90996	1.38696e-06	#N/A	0.466	#N/A	#N/A	#N/A
hsa-miR-3615	ITGB5	-0.610453	0.00329241	0.750719	0.02993	1.41501	0.000121707	#N/A	#N/A	#N/A	HITS-CLIP	#N/A
hsa-miR-3615	WNT5B	-0.591964	0.00469815	0.750719	0.02993	1.66305	0.000352495	#N/A	#N/A	#N/A	HITS-CLIP	#N/A
hsa-miR-363-3p	TRIB2	-0.554485	0.00909224	1.89704	0.00155755	0.850792	0.0217262	#N/A	0.912	#N/A	#N/A	#N/A
hsa-miR-363-3p	ST8SIA1	-0.519103	0.0158912	1.89704	0.00155755	0.723899	0.000704607	#N/A	0.61	#N/A	#N/A	#N/A
hsa-miR-3934-5p	DDIT4	-0.567379	0.00730698	1.94795	4.21803e-05	0.636328	0.00227623	#N/A	#N/A	PAR-CLIP	#N/A	23592263
hsa-miR-4429	CD63	-0.563729	0.00778011	0.584587	0.0280096	1.29963	0.0416823	#N/A	#N/A	#N/A	HITS-CLIP	#N/A
hsa-miR-4429	MANF	-0.664933	0.0010066	0.584587	0.0280096	1.40278	0.00611961	#N/A	#N/A	#N/A	HITS-CLIP	#N/A
hsa-miR-4429	OSTF1	-0.556599	0.00877731	0.584587	0.0280096	1.24017	0.0323829	#N/A	0.868	#N/A	#N/A	#N/A
hsa-miR-4429	ITGB5	-0.559032	0.00842585	0.584587	0.0280096	1.41501	0.000121707	#N/A	0.749	#N/A	#N/A	#N/A
hsa-miR-4429	CISD2	-0.617247	0.00287346	0.584587	0.0280096	1.21797	0.0380164	#N/A	0.683	#N/A	#N/A	#N/A
hsa-miR-4429	BZW2	-0.6181	0.00282415	0.584587	0.0280096	1.25292	0.0318061	#N/A	0.632	#N/A	#N/A	#N/A
hsa-miR-4429	EZR	-0.601867	0.00389375	0.584587	0.0280096	1.53828	0.000615531	#N/A	0.589	#N/A	#N/A	#N/A
hsa-miR-4429	NMI	-0.519049	0.015904	0.584587	0.0280096	1.23689	0.0229527	#N/A	0.586	#N/A	#N/A	#N/A
hsa-miR-4429	SLC50A1	-0.648846	0.00146235	0.584587	0.0280096	1.28973	0.0128476	#N/A	0.578	#N/A	#N/A	#N/A
hsa-miR-4429	CBX8	-0.529557	0.0135557	0.584587	0.0280096	1.52331	0.0195569	#N/A	0.576	#N/A	#N/A	#N/A
hsa-miR-4429	ATP1B3	-0.546491	0.0103682	0.584587	0.0280096	1.27599	0.00939396	#N/A	0.569	#N/A	#N/A	#N/A
hsa-miR-4429	S100A10	-0.516901	0.0164222	0.584587	0.0280096	1.45091	0.00677758	#N/A	0.562	#N/A	#N/A	#N/A
hsa-miR-4429	C1QTNF3	-0.513594	0.0172465	0.584587	0.0280096	1.51663	0.0134932	#N/A	0.538	#N/A	#N/A	#N/A
hsa-miR-4429	ACOT7	-0.568776	0.00713227	0.584587	0.0280096	1.42613	0.00732009	#N/A	0.485	#N/A	#N/A	#N/A
hsa-miR-4429	C11orf24	-0.557884	0.00859017	0.584587	0.0280096	1.19741	0.0175393	#N/A	0.476	#N/A	#N/A	#N/A
hsa-miR-4429	HM13	-0.609076	0.00338325	0.584587	0.0280096	1.17719	0.0173647	#N/A	0.474	#N/A	#N/A	#N/A
hsa-miR-4429	KDELR2	-0.565927	0.00749232	0.584587	0.0280096	1.24079	0.0279728	#N/A	0.465	#N/A	#N/A	#N/A
hsa-miR-4429	TIMMDC1	-0.69732	0.000442315	0.584587	0.0280096	1.21882	0.0236457	#N/A	0.464	#N/A	#N/A	#N/A
hsa-miR-4429	GDE1	-0.523669	0.014834	0.584587	0.0280096	1.26183	0.0134248	#N/A	0.462	#N/A	#N/A	#N/A
hsa-miR-4429	SEC61A1	-0.506585	0.0191036	0.584587	0.0280096	1.13385	0.00191694	#N/A	0.462	#N/A	#N/A	#N/A
hsa-miR-4429	SPINT1	-0.702393	0.000385186	0.584587	0.0280096	1.56891	0.0019646	#N/A	0.452	#N/A	#N/A	#N/A
hsa-miR-4429	THY1	-0.549953	0.00979881	0.584587	0.0280096	1.55609	0.0481761	#N/A	0.452	#N/A	#N/A	#N/A
hsa-miR-4429	POLR2L	-0.637375	0.0018846	0.584587	0.0280096	1.28548	0.0250659	#N/A	0.451	#N/A	#N/A	#N/A
hsa-miR-455-3p	TMEM154	-0.50973	0.0182515	0.684577	0.0223927	1.55241	3.49404e-05	#N/A	#N/A	HITS-CLIP	#N/A	23706177
hsa-miR-455-3p	FZD10	-0.532927	0.0128651	0.684577	0.0223927	1.72547	0.00682629	#N/A	0.766	#N/A	#N/A	#N/A
hsa-miR-455-3p	ASPN	-0.509021	0.0184408	0.684577	0.0223927	1.64873	0.0303721	#N/A	0.761	#N/A	#N/A	#N/A
hsa-miR-455-3p	KIAA0040	-0.513145	0.0173609	0.684577	0.0223927	1.49597	2.84956e-07	#N/A	0.569	#N/A	#N/A	#N/A
hsa-miR-493-3p	CYP8B1	-0.72647	0.000191958	0.613674	0.0337236	2.12301	0.0283547	#N/A	0.664	#N/A	#N/A	#N/A
hsa-miR-493-3p	DNER	-0.576535	0.00622317	0.613674	0.0337236	3.37474	4.23778e-11	#N/A	0.531	#N/A	#N/A	#N/A
hsa-miR-493-3p	FAM83G	-0.606475	0.00356057	0.613674	0.0337236	1.40738	0.00230218	#N/A	0.527	#N/A	#N/A	#N/A
hsa-miR-493-3p	BVES	-0.581633	0.00567971	0.613674	0.0337236	1.48425	0.000204717	#N/A	0.488	#N/A	#N/A	#N/A
hsa-miR-493-3p	LUM	-0.591542	0.0047353	0.613674	0.0337236	1.57409	0.013174	#N/A	0.461	#N/A	#N/A	#N/A
hsa-miR-493-3p	MGP	-0.664063	0.00102771	0.613674	0.0337236	1.43587	0.0206279	#N/A	0.459	#N/A	#N/A	#N/A
hsa-miR-493-3p	SYTL4	-0.565954	0.00748885	0.613674	0.0337236	1.24364	0.0267448	#N/A	0.453	#N/A	#N/A	#N/A
hsa-miR-495-3p	TMED2	-0.547264	0.0102387	0.663366	0.0152334	1.2241	0.0484957	-0.119 / -0.01	#N/A	#N/A	#N/A	#N/A
hsa-miR-495-3p	C1QTNF3	-0.501949	0.0204179	0.663366	0.0152334	1.51663	0.0134932	-0.01	#N/A	#N/A	#N/A	#N/A
hsa-miR-495-3p	DSTN	-0.544827	0.0106512	0.663366	0.0152334	1.36426	0.000718509	-0.031	#N/A	#N/A	#N/A	#N/A
hsa-miR-502-3p	ELMO1	-0.521567	0.0153133	0.751785	0.0440533	1.32902	0.00779839	#N/A	#N/A	#N/A	PAR-CLIP	#N/A
hsa-miR-502-3p	PDGFA	-0.530059	0.013451	0.751785	0.0440533	1.50072	5.23331e-06	#N/A	#N/A	#N/A	HITS-CLIP	#N/A
hsa-miR-502-3p	DCLK1	-0.529787	0.0135075	0.751785	0.0440533	1.95518	0.0240798	-0.164	0.913	#N/A	#N/A	#N/A
hsa-miR-502-3p	PTPRK	-0.506731	0.0190635	0.751785	0.0440533	1.46929	0.00150977	#N/A	0.75	#N/A	#N/A	#N/A
hsa-miR-502-3p	TIMELESS	-0.521523	0.0153235	0.751785	0.0440533	1.18954	0.0481692	#N/A	0.748	#N/A	#N/A	#N/A
hsa-miR-502-3p	RAI14	-0.557576	0.00863481	0.751785	0.0440533	1.73434	5.55852e-06	-0.343	0.671	#N/A	#N/A	#N/A
hsa-miR-502-3p	OSBPL6	-0.609089	0.0033824	0.751785	0.0440533	1.45631	0.00143919	#N/A	0.658	#N/A	#N/A	#N/A
hsa-miR-502-3p	FAT3	-0.560499	0.0082197	0.751785	0.0440533	3.0352	9.93449e-08	#N/A	0.625	#N/A	#N/A	#N/A
hsa-miR-502-3p	SCN4B	-0.557767	0.00860714	0.751785	0.0440533	1.76515	0.00682629	#N/A	0.56	#N/A	#N/A	#N/A
hsa-miR-502-3p	POMT2	-0.60341	0.00377944	0.751785	0.0440533	1.41287	3.45766e-08	#N/A	0.543	#N/A	#N/A	#N/A
hsa-miR-502-3p	CHRD	-0.609192	0.00337556	0.751785	0.0440533	1.3606	0.0250319	#N/A	0.513	#N/A	#N/A	#N/A
hsa-miR-502-3p	PITPNM3	-0.562942	0.00788543	0.751785	0.0440533	1.72468	0.00045456	#N/A	0.508	#N/A	#N/A	#N/A
hsa-miR-502-3p	ITGA5	-0.565304	0.00757301	0.751785	0.0440533	1.44798	1.29167e-08	#N/A	0.495	#N/A	#N/A	#N/A
hsa-miR-502-3p	TMEM154	-0.549455	0.00987905	0.751785	0.0440533	1.55241	3.49404e-05	#N/A	0.489	#N/A	#N/A	#N/A
hsa-miR-502-3p	BMPR1B	-0.538715	0.0117458	0.751785	0.0440533	3.20461	1.27502e-07	#N/A	0.479	#N/A	#N/A	#N/A
hsa-miR-502-3p	PRKAR2B	-0.518812	0.0159605	0.751785	0.0440533	1.43724	0.0454091	#N/A	0.479	#N/A	#N/A	#N/A
hsa-miR-502-3p	NTF3	-0.56646	0.00742379	0.751785	0.0440533	2.71988	6.59377e-06	#N/A	0.473	#N/A	#N/A	#N/A
hsa-miR-502-3p	SH3KBP1	-0.500744	0.020771	0.751785	0.0440533	1.50168	2.15822e-05	#N/A	0.471	#N/A	#N/A	#N/A
hsa-miR-502-3p	ARSB	-0.511626	0.0177526	0.751785	0.0440533	1.37247	0.000277642	#N/A	0.462	#N/A	#N/A	#N/A
hsa-miR-502-3p	FOCAD	-0.503218	0.0200512	0.751785	0.0440533	1.28892	0.00421849	#N/A	0.453	#N/A	#N/A	#N/A
hsa-miR-502-3p	TFPI2	-0.511504	0.0177844	0.751785	0.0440533	4.07547	9.91964e-09	#N/A	0.45	#N/A	#N/A	#N/A
hsa-miR-532-3p	ACKR3	-0.591148	0.00477019	0.517838	0.00146123	1.34498	0.00795613	#N/A	#N/A	#N/A	HITS-CLIP	#N/A
hsa-miR-532-3p	CCND1	-0.506683	0.0190765	0.517838	0.00146123	1.62929	0.000114189	#N/A	#N/A	#N/A	HITS-CLIP	#N/A
hsa-miR-532-3p	RAB29	-0.544833	0.0106502	0.517838	0.00146123	1.29782	0.00404014	#N/A	#N/A	#N/A	HITS-CLIP	#N/A
hsa-miR-532-3p	SLC35E4	-0.630028	0.00220562	0.517838	0.00146123	1.57098	0.000925597	#N/A	#N/A	HITS-CLIP	#N/A	23824327
hsa-miR-532-3p	GDF6	-0.591475	0.00474122	0.517838	0.00146123	1.5848	0.0318986	-0.116/-0.138	0.924	#N/A	#N/A	#N/A
hsa-miR-532-3p	SMOC1	-0.519342	0.0158344	0.517838	0.00146123	1.46344	5.80064e-06	#N/A	0.914	#N/A	#N/A	#N/A
hsa-miR-532-3p	MAPKAPK3	-0.560371	0.00823757	0.517838	0.00146123	1.37066	0.000590975	#N/A	0.73	#N/A	#N/A	#N/A
hsa-miR-532-3p	HSD3B7	-0.629863	0.00221332	0.517838	0.00146123	1.43885	0.0264575	#N/A	0.707	#N/A	#N/A	#N/A
hsa-miR-532-3p	RASA3	-0.60488	0.0036731	0.517838	0.00146123	1.2377	0.000200837	#N/A	0.692	#N/A	#N/A	#N/A
hsa-miR-532-3p	PITPNM3	-0.592298	0.00466892	0.517838	0.00146123	1.72468	0.00045456	#N/A	0.677	#N/A	#N/A	#N/A
hsa-miR-532-3p	SCN4B	-0.51701	0.0163955	0.517838	0.00146123	1.76515	0.00682629	#N/A	0.673	#N/A	#N/A	#N/A
hsa-miR-532-3p	ITGA3	-0.579644	0.00588682	0.517838	0.00146123	1.66847	3.76424e-07	#N/A	0.654	#N/A	HITS-CLIP	#N/A
hsa-miR-532-3p	TMEM100	-0.509332	0.0183577	0.517838	0.00146123	1.64399	8.04254e-06	#N/A	0.613	#N/A	#N/A	#N/A
hsa-miR-532-3p	TNFRSF12A	-0.541309	0.0112706	0.517838	0.00146123	2.67544	1.14023e-08	#N/A	0.555	#N/A	#N/A	#N/A
hsa-miR-532-3p	POMT2	-0.5489	0.00996913	0.517838	0.00146123	1.41287	3.45766e-08	#N/A	0.549	#N/A	#N/A	#N/A
hsa-miR-532-3p	XKR8	-0.563877	0.00776052	0.517838	0.00146123	1.21515	0.0218634	#N/A	0.545	#N/A	#N/A	#N/A
hsa-miR-532-3p	TRAFD1	-0.508707	0.0185253	0.517838	0.00146123	1.20367	0.00706963	#N/A	0.531	#N/A	#N/A	#N/A
hsa-miR-532-3p	TAGLN2	-0.508193	0.018664	0.517838	0.00146123	1.41777	0.00424493	#N/A	0.53	#N/A	#N/A	#N/A
hsa-miR-532-3p	ITGB4	-0.501288	0.0206109	0.517838	0.00146123	1.38355	0.0350955	#N/A	0.512	#N/A	#N/A	#N/A
hsa-miR-532-3p	ENDOD1	-0.55019	0.00976068	0.517838	0.00146123	1.30316	0.000320561	#N/A	0.491	#N/A	#N/A	#N/A
hsa-miR-532-3p	SPINT1	-0.569915	0.0069923	0.517838	0.00146123	1.56891	0.0019646	#N/A	0.48	#N/A	#N/A	#N/A
hsa-miR-532-3p	ISLR2	-0.596434	0.00431947	0.517838	0.00146123	2.17585	0.00116992	#N/A	0.461	#N/A	#N/A	#N/A
hsa-miR-532-3p	PLAUR	-0.563291	0.00783865	0.517838	0.00146123	1.8954	4.8656e-07	#N/A	0.454	#N/A	#N/A	#N/A
hsa-miR-532-3p	TNC	-0.578317	0.00602853	0.517838	0.00146123	1.41379	0.0108575	#N/A	0.454	#N/A	#N/A	#N/A
hsa-miR-543	CARS	-0.551654	0.00952845	0.435064	0.00255934	1.15795	0.0341537	#N/A	0.59	#N/A	#N/A	#N/A
hsa-miR-543	SNX7	-0.530364	0.0133877	0.435064	0.00255934	1.44743	0.00567087	#N/A	0.509	#N/A	#N/A	#N/A
hsa-miR-543	SMOC1	-0.524236	0.0147069	0.435064	0.00255934	1.46344	5.80064e-06	#N/A	0.471	#N/A	#N/A	#N/A
hsa-miR-543	EGLN3	-0.549027	0.00994847	0.435064	0.00255934	1.38713	0.0108888	#N/A	0.453	#N/A	#N/A	#N/A
hsa-miR-7-5p	IGDCC4	-0.644756	0.00160264	1.94213	0.00470517	0.700214	0.00445643	#N/A	0.848 /0.596	#N/A	#N/A	#N/A
hsa-miR-7-5p	CDS1	-0.619728	0.00273204	1.94213	0.00470517	0.591044	0.0410683	#N/A	0.751	#N/A	#N/A	#N/A
hsa-miR-7-5p	FMN1	-0.516684	0.0164753	1.94213	0.00470517	0.74803	0.00507133	#N/A	0.635	#N/A	#N/A	#N/A
hsa-miR-7-5p	PDZD2	-0.563085	0.00786627	1.94213	0.00470517	0.759895	0.0312689	#N/A	0.562	#N/A	#N/A	#N/A
hsa-miR-7-5p	TRIB2	-0.605848	0.00360448	1.94213	0.00470517	0.850792	0.0217262	#N/A	0.558	#N/A	#N/A	#N/A
hsa-miR-7-5p	CRTC3	-0.545736	0.0104959	1.94213	0.00470517	0.873514	0.0325859	#N/A	0.533	Microarray	Microarrays	19073608
hsa-miR-92a-3p	COL27A1	-0.52283	0.015024	1.7281	0.0145125	0.696902	0.0193037	-0.223	0.997	#N/A	#N/A	#N/A
hsa-miR-92a-3p	NFYC	-0.527835	0.0139198	1.7281	0.0145125	0.891814	0.0291452	#N/A	0.967	#N/A	#N/A	#N/A
hsa-miR-92a-3p	SNAI2	-0.507145	0.0189498	1.7281	0.0145125	0.808432	0.0177232	#N/A	0.844	#N/A	#N/A	#N/A
hsa-miR-92a-3p	SERPINA3	-0.556981	0.00872129	1.7281	0.0145125	0.629338	0.025557	#N/A	0.757	#N/A	#N/A	#N/A
hsa-miR-92a-3p	RPS6KA5	-0.523577	0.0148548	1.7281	0.0145125	0.750037	0.0272182	#N/A	0.675	#N/A	#N/A	#N/A
hsa-miR-92a-3p	TFDP2	-0.506952	0.0190026	1.7281	0.0145125	0.852241	0.0226817	-0.281	0.531	#N/A	#N/A	#N/A
hsa-miR-92a-3p	HINT3	-0.557007	0.00871758	1.7281	0.0145125	0.83449	0.0280448	#N/A	0.518	#N/A	#N/A	#N/A
hsa-miR-92a-3p	SNX18	-0.607335	0.00350114	1.7281	0.0145125	0.87518	0.0351975	#N/A	0.485	#N/A	#N/A	#N/A
hsa-miR-92a-3p	TESK2	-0.632855	0.00207705	1.7281	0.0145125	0.839418	0.0402789	#N/A	0.48	#N/A	#N/A	#N/A
hsa-miR-93-5p	EPHB4	-0.533444	0.0127618	1.72206	0.000156571	0.798777	0.00405345	-0.14	0.91	#N/A	HITS-CLIP	#N/A
hsa-miR-95-3p	MKNK2	-0.578535	0.00600508	4.3462	1.21891e-06	0.835077	0.032525	#N/A	0.553	#N/A	#N/A	#N/A
hsa-miR-99a-3p	PLXNA2	-0.586173	0.00522935	0.562903	0.00478823	1.37298	0.0105703	#N/A	0.793 /0.453	#N/A	#N/A	#N/A
hsa-miR-99a-3p	DGKI	-0.62223	0.00259539	0.562903	0.00478823	2.07126	5.49357e-05	#N/A	0.7/0.51	#N/A	#N/A	#N/A
hsa-miR-99a-3p	SURF4	-0.672551	0.000836971	0.562903	0.00478823	1.18666	0.000457764	#N/A	0.505/0.487	#N/A	#N/A	#N/A
hsa-miR-99a-3p	ITGA3	-0.626886	0.00235627	0.562903	0.00478823	1.66847	3.76424e-07	#N/A	0.947	#N/A	#N/A	#N/A
hsa-miR-99a-3p	TIMMDC1	-0.555752	0.00890244	0.562903	0.00478823	1.21882	0.0236457	#N/A	0.728	#N/A	#N/A	#N/A
hsa-miR-99a-3p	CEP55	-0.585931	0.00525252	0.562903	0.00478823	1.96033	0.0269753	#N/A	0.701	#N/A	#N/A	#N/A
hsa-miR-99a-3p	WNT9A	-0.610546	0.00328637	0.562903	0.00478823	2.41553	9.36336e-08	#N/A	0.696	#N/A	#N/A	#N/A
hsa-miR-99a-3p	OSBPL3	-0.599859	0.00404679	0.562903	0.00478823	1.63312	0.000732157	#N/A	0.621	#N/A	#N/A	#N/A
hsa-miR-99a-3p	DKK3	-0.531978	0.0130565	0.562903	0.00478823	1.5964	0.000451034	#N/A	0.609	#N/A	#N/A	#N/A
hsa-miR-99a-3p	ARSI	-0.543107	0.0109505	0.562903	0.00478823	1.78539	0.000907824	#N/A	0.602	#N/A	#N/A	#N/A
hsa-miR-99a-3p	ITGB5	-0.709937	0.000311947	0.562903	0.00478823	1.41501	0.000121707	#N/A	0.572	#N/A	HITS-CLIP	#N/A
hsa-miR-99a-3p	ADTRP	-0.657379	0.00120275	0.562903	0.00478823	1.90684	0.000742659	#N/A	0.568	#N/A	#N/A	#N/A
hsa-miR-99a-3p	FZD1	-0.730814	0.000168008	0.562903	0.00478823	1.37312	0.00500002	#N/A	0.561	#N/A	#N/A	#N/A
hsa-miR-99a-3p	RTN4	-0.53706	0.0120574	0.562903	0.00478823	1.15434	0.0306618	#N/A	0.561	#N/A	#N/A	#N/A
hsa-miR-99a-3p	DIAPH3	-0.539527	0.0115953	0.562903	0.00478823	2.437	0.000385385	#N/A	0.554	#N/A	#N/A	#N/A
hsa-miR-99a-3p	ASPN	-0.503364	0.0200093	0.562903	0.00478823	1.64873	0.0303721	#N/A	0.541	#N/A	#N/A	#N/A
hsa-miR-99a-3p	BBS12	-0.545384	0.0105558	0.562903	0.00478823	1.39651	0.00967465	#N/A	0.533	#N/A	#N/A	#N/A
hsa-miR-99a-3p	MTHFD1L	-0.512948	0.0174113	0.562903	0.00478823	1.72525	3.76941e-08	#N/A	0.505	#N/A	HITS-CLIP	#N/A
hsa-miR-99a-3p	MARS	-0.531256	0.0132039	0.562903	0.00478823	1.29055	2.17722e-05	#N/A	0.503	#N/A	#N/A	#N/A
hsa-miR-99a-3p	TGFBI	-0.532602	0.0129303	0.562903	0.00478823	2.14435	0.0011109	#N/A	0.503	#N/A	#N/A	#N/A
hsa-miR-99a-3p	EML1	-0.533644	0.012722	0.562903	0.00478823	1.3081	0.0180599	#N/A	0.494	#N/A	#N/A	#N/A
hsa-miR-99a-3p	TPBG	-0.540082	0.0114934	0.562903	0.00478823	1.19065	0.0147863	#N/A	0.49	#N/A	#N/A	#N/A
hsa-miR-99a-3p	ARNTL2	-0.504632	0.0196488	0.562903	0.00478823	1.52742	0.00387771	#N/A	0.485	#N/A	#N/A	#N/A
hsa-miR-99a-3p	HMMR	-0.508649	0.0185408	0.562903	0.00478823	1.77935	0.0470616	#N/A	0.483	#N/A	#N/A	#N/A
hsa-miR-99a-3p	P4HA3	-0.505577	0.0193836	0.562903	0.00478823	1.83643	1.4888e-05	#N/A	0.471	#N/A	#N/A	#N/A
hsa-miR-99a-3p	GDF6	-0.701932	0.000390099	0.562903	0.00478823	1.5848	0.0318986	#N/A	0.467	#N/A	#N/A	#N/A
hsa-miR-99a-3p	BZW2	-0.585395	0.00530428	0.562903	0.00478823	1.25292	0.0318061	#N/A	0.455	#N/A	#N/A	#N/A
hsa-miR-99a-3p	COBL	-0.524243	0.0147053	0.562903	0.00478823	1.41163	0.0115153	#N/A	0.454	#N/A	#N/A	#N/A
hsa-miR-99a-3p	IGFBP1	-0.582131	0.00562873	0.562903	0.00478823	7.59367	1.32203e-09	#N/A	0.453	#N/A	#N/A	#N/A
hsa-miR-99a-3p	ITGA5	-0.527175	0.0140617	0.562903	0.00478823	1.44798	1.29167e-08	#N/A	0.452	#N/A	#N/A	#N/A
hsa-miR-99a-3p	KREMEN1	-0.570069	0.0069736	0.562903	0.00478823	1.37008	0.00130289	#N/A	0.451	#N/A	#N/A	#N/A
hsa-miR-99a-5p	CCNE1	-0.534035	0.0126444	0.589237	1.10448e-06	1.75449	0.0012789	#N/A	#N/A	#N/A	Western Blot	#N/A
hsa-miR-99a-5p	PON2	-0.64746	0.00150867	0.589237	1.10448e-06	1.49019	0.000800241	#N/A	0.779	#N/A	#N/A	#N/A
hsa-miR-99a-5p	ATG9A	-0.551997	0.0094747	0.589237	1.10448e-06	1.14672	0.0256204	#N/A	0.637	#N/A	#N/A	#N/A
hsa-miR-99a-5p	PRKX	-0.506273	0.01919	0.589237	1.10448e-06	1.47388	0.0085252	#N/A	0.519	#N/A	#N/A	#N/A
