# Supplementary material
Source: HighWire-hosted journal article supplement (https://ard.bmj.com/content/annrheumdis-2018-213882)
Supplement: inline-supplementary-material-12 [file inline-supplementary-material-12.xlsx]

## Sheet: Sheet1
miRNAs	Genes	r	P (corr)	Fold Change (Gene)	padj (FDR Gene)	Fold Change (miRNA)	padj (FDR miRNA)	TargetScan-CTScore	miTG-score	Tarbase	miRTarbase
hsa-let-7a-3p	INPP5D	0.297897	0.189669	0.933643	0.71454	1.8782	0.0204879	NA	NA	NA	NA
hsa-let-7a-3p	IL1B	0.151486	0.512155	0.864069	0.884336	1.8782	0.0204879	NA	NA	NA	NA
hsa-let-7a-3p	GAS5	0.0443999	0.848447	1.0647	0.746685	1.8782	0.0204879	NA	NA	NA	NA
hsa-let-7a-3p	SOX9	-0.00455821	0.984355	0.862275	0.223147	1.8782	0.0204879	NA	0.945	NA	NA
hsa-let-7a-3p	TGFB1	-0.0104817	0.964033	0.887273	0.585925	1.8782	0.0204879	NA	NA	NA	NA
hsa-let-7a-3p	SMAD4	-0.0283682	0.902849	1.08483	0.392856	1.8782	0.0204879	NA	0.731	NA	NA
hsa-let-7a-3p	SMAD2	-0.0301159	0.896894	1.18533	0.0540127	1.8782	0.0204879	NA	0.575	NA	NA
hsa-let-7a-3p	MMP13	-0.0470667	0.839454	0.895583	0.834042	1.8782	0.0204879	NA	0.51	NA	NA
hsa-let-7a-3p	SIRT1	-0.0492304	0.832173	0.945232	0.703658	1.8782	0.0204879	NA	NA	NA	NA
hsa-let-7a-3p	ACVR2B	-0.0825757	0.721955	0.958292	0.798923	1.8782	0.0204879	NA	NA	NA	PAR-CLIP
hsa-let-7a-3p	CEBPB	-0.0896311	0.699223	0.939753	0.736829	1.8782	0.0204879	NA	0.569	NA	NA
hsa-let-7a-3p	BCL2	-0.096361	0.677768	1.1389	0.259904	1.8782	0.0204879	NA	NA	NA	NA
hsa-let-7a-3p	CHRDL1	-0.12526	0.588505	1.49435	0.292121	1.8782	0.0204879	NA	NA	NA	NA
hsa-let-7a-3p	ADAMTS5	-0.204322	0.37432	1.36417	0.016705	1.8782	0.0204879	NA	0.72	NA	NA
hsa-let-7a-3p	COL2A1	-0.25627	0.262152	1.00858	0.986423	1.8782	0.0204879	NA	NA	NA	NA
hsa-let-7a-3p	IGFBP5	-0.276159	0.225601	1.29452	0.177581	1.8782	0.0204879	NA	0.523	NA	NA
hsa-let-7a-3p	GDF5	-0.515948	0.0166565	1.23117	0.309402	1.8782	0.0204879	NA	NA	NA	NA
hsa-let-7a-3p	VEGFA	-0.517623	0.0162465	1.17721	0.27403	1.8782	0.0204879	NA	0.51	NA	NA
hsa-let-7a-5p	TGFB1	0.322276	0.154224	0.887273	0.585925	1.87418	0.0129952	NA	NA	NA	NA
hsa-let-7a-5p	SMAD2	0.11225	0.628081	1.18533	0.0540127	1.87418	0.0129952	-0.215	0.488	NA	NA
hsa-let-7a-5p	ADAMTS5	0.0859434	0.711075	1.36417	0.016705	1.87418	0.0129952	-0.249	0.809	HITS-CLIP	NA
hsa-let-7a-5p	MMP13	0.0449528	0.846581	0.895583	0.834042	1.87418	0.0129952	NA	NA	NA	NA
hsa-let-7a-5p	SIRT1	0.0433076	0.852135	0.945232	0.703658	1.87418	0.0129952	NA	NA	NA	NA
hsa-let-7a-5p	IL1B	0.0301369	0.896822	0.864069	0.884336	1.87418	0.0129952	NA	NA	NA	NA
hsa-let-7a-5p	INPP5D	0.00354587	0.987829	0.933643	0.71454	1.87418	0.0129952	NA	NA	NA	NA
hsa-let-7a-5p	SOX9	-0.0395737	0.864765	0.862275	0.223147	1.87418	0.0129952	NA	NA	NA	NA
hsa-let-7a-5p	CEBPB	-0.0737038	0.750862	0.939753	0.736829	1.87418	0.0129952	NA	NA	NA	NA
hsa-let-7a-5p	BCL2	-0.0863051	0.70991	1.1389	0.259904	1.87418	0.0129952	NA	NA	NA	Microarray//qRT-PCR
hsa-let-7a-5p	VEGFA	-0.0906403	0.695991	1.17721	0.27403	1.87418	0.0129952	NA	NA	NA	NA
hsa-let-7a-5p	GAS5	-0.0950442	0.681947	1.0647	0.746685	1.87418	0.0129952	NA	NA	NA	NA
hsa-let-7a-5p	SMAD4	-0.10383	0.654233	1.08483	0.392856	1.87418	0.0129952	NA	NA	NA	NA
hsa-let-7a-5p	ACVR2B	-0.14757	0.523246	0.958292	0.798923	1.87418	0.0129952	-0.299	0.479	HITS-CLIP	NA
hsa-let-7a-5p	GDF5	-0.18515	0.42169	1.23117	0.309402	1.87418	0.0129952	NA	NA	NA	NA
hsa-let-7a-5p	IGFBP5	-0.219999	0.337943	1.29452	0.177581	1.87418	0.0129952	NA	NA	NA	NA
hsa-let-7a-5p	COL2A1	-0.247053	0.280293	1.00858	0.986423	1.87418	0.0129952	NA	NA	NA	NA
hsa-let-7a-5p	CHRDL1	-0.259545	0.25589	1.49435	0.292121	1.87418	0.0129952	NA	NA	NA	NA
hsa-let-7e-5p	TGFB1	0.515288	0.0168202	0.887273	0.585925	1.76894	0.00536864	NA	NA	NA	NA
hsa-let-7e-5p	MMP13	0.161896	0.483228	0.895583	0.834042	1.76894	0.00536864	NA	NA	NA	NA
hsa-let-7e-5p	CEBPB	0.159729	0.489181	0.939753	0.736829	1.76894	0.00536864	NA	NA	NA	NA
hsa-let-7e-5p	INPP5D	0.121301	0.600437	0.933643	0.71454	1.76894	0.00536864	NA	NA	NA	NA
hsa-let-7e-5p	IL1B	0.0964604	0.677452	0.864069	0.884336	1.76894	0.00536864	NA	NA	NA	NA
hsa-let-7e-5p	ADAMTS5	0.0781507	0.73633	1.36417	0.016705	1.76894	0.00536864	-0.249	0.956	HITS-CLIP	NA
hsa-let-7e-5p	GAS5	0.022069	0.924354	1.0647	0.746685	1.76894	0.00536864	NA	NA	NA	NA
hsa-let-7e-5p	GDF5	-0.0309183	0.894161	1.23117	0.309402	1.76894	0.00536864	NA	NA	NA	NA
hsa-let-7e-5p	SMAD2	-0.0939158	0.685536	1.18533	0.0540127	1.76894	0.00536864	-0.215	0.506	NA	NA
hsa-let-7e-5p	SMAD4	-0.109675	0.636034	1.08483	0.392856	1.76894	0.00536864	NA	NA	NA	NA
hsa-let-7e-5p	VEGFA	-0.115139	0.6192	1.17721	0.27403	1.76894	0.00536864	NA	NA	NA	NA
hsa-let-7e-5p	CHRDL1	-0.120986	0.60139	1.49435	0.292121	1.76894	0.00536864	NA	NA	NA	NA
hsa-let-7e-5p	SOX9	-0.146538	0.526186	0.862275	0.223147	1.76894	0.00536864	NA	NA	NA	NA
hsa-let-7e-5p	BCL2	-0.169438	0.462795	1.1389	0.259904	1.76894	0.00536864	NA	NA	NA	NA
hsa-let-7e-5p	ACVR2B	-0.170429	0.460144	0.958292	0.798923	1.76894	0.00536864	-0.299	NA	PAR-CLIP	NA
hsa-let-7e-5p	SIRT1	-0.179701	0.435716	0.945232	0.703658	1.76894	0.00536864	NA	NA	NA	NA
hsa-let-7e-5p	COL2A1	-0.236398	0.302215	1.00858	0.986423	1.76894	0.00536864	NA	NA	NA	NA
hsa-let-7e-5p	IGFBP5	-0.262944	0.249492	1.29452	0.177581	1.76894	0.00536864	NA	NA	HITS-CLIP	NA
hsa-let-7f-5p	GAS5	0.221429	0.334731	1.0647	0.746685	2.52888	0.000418087	NA	NA	NA	NA
hsa-let-7f-5p	TGFB1	0.195412	0.395946	0.887273	0.585925	2.52888	0.000418087	NA	NA	NA	NA
hsa-let-7f-5p	IL1B	0.185184	0.421603	0.864069	0.884336	2.52888	0.000418087	NA	NA	NA	NA
hsa-let-7f-5p	CEBPB	0.0741791	0.749304	0.939753	0.736829	2.52888	0.000418087	NA	NA	NA	NA
hsa-let-7f-5p	MMP13	0.0514536	0.824705	0.895583	0.834042	2.52888	0.000418087	NA	NA	NA	NA
hsa-let-7f-5p	INPP5D	-0.00178665	0.993867	0.933643	0.71454	2.52888	0.000418087	NA	NA	NA	NA
hsa-let-7f-5p	ADAMTS5	-0.0342402	0.882861	1.36417	0.016705	2.52888	0.000418087	-0.249	0.82	HITS-CLIP	NA
hsa-let-7f-5p	SMAD2	-0.160636	0.486686	1.18533	0.0540127	2.52888	0.000418087	-0.226	0.49	NA	NA
hsa-let-7f-5p	SIRT1	-0.197212	0.391521	0.945232	0.703658	2.52888	0.000418087	NA	NA	NA	NA
hsa-let-7f-5p	BCL2	-0.214645	0.350122	1.1389	0.259904	2.52888	0.000418087	NA	NA	NA	NA
hsa-let-7f-5p	SMAD4	-0.218247	0.341901	1.08483	0.392856	2.52888	0.000418087	NA	NA	NA	NA
hsa-let-7f-5p	SOX9	-0.23315	0.309101	0.862275	0.223147	2.52888	0.000418087	NA	NA	NA	NA
hsa-let-7f-5p	VEGFA	-0.252307	0.269858	1.17721	0.27403	2.52888	0.000418087	NA	NA	NA	NA
hsa-let-7f-5p	GDF5	-0.265009	0.245656	1.23117	0.309402	2.52888	0.000418087	NA	NA	NA	NA
hsa-let-7f-5p	ACVR2B	-0.276334	0.225296	0.958292	0.798923	2.52888	0.000418087	-0.25	0.489	HITS-CLIP	NA
hsa-let-7f-5p	CHRDL1	-0.335351	0.137253	1.49435	0.292121	2.52888	0.000418087	NA	NA	NA	NA
hsa-let-7f-5p	COL2A1	-0.375578	0.0933871	1.00858	0.986423	2.52888	0.000418087	NA	NA	NA	NA
hsa-let-7f-5p	IGFBP5	-0.399584	0.072715	1.29452	0.177581	2.52888	0.000418087	NA	NA	NA	NA
hsa-let-7g-5p	TGFB1	0.255426	0.263782	0.887273	0.585925	1.52676	0.0353047	NA	NA	NA	NA
hsa-let-7g-5p	GAS5	0.176746	0.443426	1.0647	0.746685	1.52676	0.0353047	NA	NA	NA	NA
hsa-let-7g-5p	IL1B	0.128617	0.578468	0.864069	0.884336	1.52676	0.0353047	NA	NA	NA	NA
hsa-let-7g-5p	CEBPB	0.0629849	0.786216	0.939753	0.736829	1.52676	0.0353047	NA	NA	NA	NA
hsa-let-7g-5p	INPP5D	-0.0638608	0.78331	0.933643	0.71454	1.52676	0.0353047	NA	NA	NA	NA
hsa-let-7g-5p	MMP13	-0.0654272	0.778122	0.895583	0.834042	1.52676	0.0353047	NA	NA	NA	NA
hsa-let-7g-5p	ACVR2B	-0.0727556	0.753971	0.958292	0.798923	1.52676	0.0353047	-0.25	0.489	HITS-CLIP	NA
hsa-let-7g-5p	SMAD4	-0.0856041	0.712169	1.08483	0.392856	1.52676	0.0353047	NA	NA	NA	NA
hsa-let-7g-5p	ADAMTS5	-0.115958	0.616694	1.36417	0.016705	1.52676	0.0353047	-0.249	0.814	HITS-CLIP	NA
hsa-let-7g-5p	BCL2	-0.147752	0.522727	1.1389	0.259904	1.52676	0.0353047	NA	NA	NA	NA
hsa-let-7g-5p	SIRT1	-0.168955	0.464092	0.945232	0.703658	1.52676	0.0353047	NA	NA	NA	NA
hsa-let-7g-5p	SMAD2	-0.19523	0.396395	1.18533	0.0540127	1.52676	0.0353047	-0.215	0.493	NA	Luciferase reporter assay//qRT-PCR//Western blot
hsa-let-7g-5p	GDF5	-0.196814	0.392498	1.23117	0.309402	1.52676	0.0353047	NA	NA	NA	NA
hsa-let-7g-5p	SOX9	-0.199941	0.384869	0.862275	0.223147	1.52676	0.0353047	NA	NA	NA	NA
hsa-let-7g-5p	IGFBP5	-0.269023	0.238309	1.29452	0.177581	1.52676	0.0353047	NA	NA	NA	NA
hsa-let-7g-5p	VEGFA	-0.270428	0.23577	1.17721	0.27403	1.52676	0.0353047	NA	NA	NA	NA
hsa-let-7g-5p	CHRDL1	-0.330411	0.143503	1.49435	0.292121	1.52676	0.0353047	NA	NA	NA	NA
hsa-let-7g-5p	COL2A1	-0.406665	0.0673314	1.00858	0.986423	1.52676	0.0353047	NA	NA	NA	NA
hsa-miR-100-5p	GDF5	0.47573	0.0292729	1.23117	0.309402	1.27086	0.0267689	NA	NA	NA	NA
hsa-miR-100-5p	VEGFA	0.458157	0.036736	1.17721	0.27403	1.27086	0.0267689	NA	NA	NA	NA
hsa-miR-100-5p	COL2A1	0.43042	0.0514501	1.00858	0.986423	1.27086	0.0267689	NA	NA	NA	NA
hsa-miR-100-5p	CHRDL1	0.403887	0.0694062	1.49435	0.292121	1.27086	0.0267689	NA	NA	NA	NA
hsa-miR-100-5p	ADAMTS5	0.318899	0.158835	1.36417	0.016705	1.27086	0.0267689	NA	NA	NA	NA
hsa-miR-100-5p	SMAD2	0.313744	0.166058	1.18533	0.0540127	1.27086	0.0267689	NA	NA	NA	NA
hsa-miR-100-5p	BCL2	0.215091	0.349098	1.1389	0.259904	1.27086	0.0267689	NA	NA	Western Blot	NA
hsa-miR-100-5p	IGFBP5	0.190086	0.409197	1.29452	0.177581	1.27086	0.0267689	NA	NA	NA	NA
hsa-miR-100-5p	MMP13	0.138439	0.549538	0.895583	0.834042	1.27086	0.0267689	NA	NA	Microarrays	Microarray//qRT-PCR//Western blot
hsa-miR-100-5p	SMAD4	0.106013	0.647414	1.08483	0.392856	1.27086	0.0267689	NA	NA	NA	NA
hsa-miR-100-5p	SIRT1	0.0872465	0.70688	0.945232	0.703658	1.27086	0.0267689	NA	NA	NA	NA
hsa-miR-100-5p	SOX9	0.077024	0.740004	0.862275	0.223147	1.27086	0.0267689	NA	NA	NA	NA
hsa-miR-100-5p	ACVR2B	0.0595334	0.79769	0.958292	0.798923	1.27086	0.0267689	NA	NA	NA	NA
hsa-miR-100-5p	CEBPB	0.00541836	0.981403	0.939753	0.736829	1.27086	0.0267689	NA	NA	NA	NA
hsa-miR-100-5p	INPP5D	-0.0760862	0.743066	0.933643	0.71454	1.27086	0.0267689	NA	NA	NA	NA
hsa-miR-100-5p	TGFB1	-0.159117	0.490871	0.887273	0.585925	1.27086	0.0267689	NA	NA	NA	NA
hsa-miR-100-5p	IL1B	-0.280319	0.218403	0.864069	0.884336	1.27086	0.0267689	NA	NA	NA	NA
hsa-miR-100-5p	GAS5	-0.338327	0.133584	1.0647	0.746685	1.27086	0.0267689	NA	NA	NA	NA
hsa-miR-101-3p	GAS5	0.641707	0.00171446	1.0647	0.746685	2.02019	0.00157188	NA	NA	NA	NA
hsa-miR-101-3p	IL1B	0.282755	0.21426	0.864069	0.884336	2.02019	0.00157188	NA	NA	NA	NA
hsa-miR-101-3p	CEBPB	0.280281	0.218468	0.939753	0.736829	2.02019	0.00157188	NA	NA	NA	NA
hsa-miR-101-3p	INPP5D	0.0544766	0.814573	0.933643	0.71454	2.02019	0.00157188	NA	NA	NA	NA
hsa-miR-101-3p	MMP13	0.0300997	0.896949	0.895583	0.834042	2.02019	0.00157188	NA	NA	NA	NA
hsa-miR-101-3p	CHRDL1	0.0232379	0.920359	1.49435	0.292121	2.02019	0.00157188	NA	NA	NA	NA
hsa-miR-101-3p	GDF5	-0.196393	0.393531	1.23117	0.309402	2.02019	0.00157188	NA	NA	NA	NA
hsa-miR-101-3p	COL2A1	-0.219303	0.339511	1.00858	0.986423	2.02019	0.00157188	NA	NA	NA	NA
hsa-miR-101-3p	SMAD4	-0.23674	0.301497	1.08483	0.392856	2.02019	0.00157188	NA	NA	NA	NA
hsa-miR-101-3p	BCL2	-0.248296	0.277802	1.1389	0.259904	2.02019	0.00157188	NA	NA	NA	NA
hsa-miR-101-3p	ACVR2B	-0.277374	0.223484	0.958292	0.798923	2.02019	0.00157188	NA	NA	PAR-CLIP	Sequencing
hsa-miR-101-3p	TGFB1	-0.298248	0.189122	0.887273	0.585925	2.02019	0.00157188	NA	NA	NA	NA
hsa-miR-101-3p	ADAMTS5	-0.303107	0.181669	1.36417	0.016705	2.02019	0.00157188	NA	NA	NA	NA
hsa-miR-101-3p	VEGFA	-0.353132	0.116358	1.17721	0.27403	2.02019	0.00157188	NA	NA	NA	Luciferase reporter assay//qRT-PCR
hsa-miR-101-3p	SOX9	-0.403058	0.0700344	0.862275	0.223147	2.02019	0.00157188	NA	NA	NA	Luciferase reporter assay//qRT-PCR//Western blot
hsa-miR-101-3p	IGFBP5	-0.406524	0.0674354	1.29452	0.177581	2.02019	0.00157188	NA	NA	NA	NA
hsa-miR-101-3p	SIRT1	-0.483736	0.0262973	0.945232	0.703658	2.02019	0.00157188	NA	NA	NA	NA
hsa-miR-101-3p	SMAD2	-0.571782	0.00676791	1.18533	0.0540127	2.02019	0.00157188	NA	NA	PAR-CLIP	NA
hsa-miR-106b-3p	CHRDL1	0.4701	0.0315201	1.49435	0.292121	1.33337	0.00232566	NA	NA	NA	NA
hsa-miR-106b-3p	ADAMTS5	0.32092	0.156065	1.36417	0.016705	1.33337	0.00232566	NA	NA	NA	NA
hsa-miR-106b-3p	CEBPB	0.16	0.488435	0.939753	0.736829	1.33337	0.00232566	NA	NA	NA	NA
hsa-miR-106b-3p	SMAD2	0.153642	0.506097	1.18533	0.0540127	1.33337	0.00232566	NA	NA	NA	NA
hsa-miR-106b-3p	COL2A1	0.149061	0.519009	1.00858	0.986423	1.33337	0.00232566	NA	NA	NA	NA
hsa-miR-106b-3p	GAS5	0.0953002	0.681134	1.0647	0.746685	1.33337	0.00232566	NA	NA	NA	NA
hsa-miR-106b-3p	IGFBP5	0.0795568	0.731753	1.29452	0.177581	1.33337	0.00232566	NA	NA	NA	NA
hsa-miR-106b-3p	IL1B	0.0786423	0.734729	0.864069	0.884336	1.33337	0.00232566	NA	NA	NA	NA
hsa-miR-106b-3p	VEGFA	0.0534484	0.818016	1.17721	0.27403	1.33337	0.00232566	NA	NA	NA	NA
hsa-miR-106b-3p	MMP13	-0.00506691	0.982609	0.895583	0.834042	1.33337	0.00232566	NA	NA	NA	NA
hsa-miR-106b-3p	SMAD4	-0.0133021	0.954364	1.08483	0.392856	1.33337	0.00232566	NA	NA	NA	NA
hsa-miR-106b-3p	BCL2	-0.0472759	0.83875	1.1389	0.259904	1.33337	0.00232566	NA	NA	NA	NA
hsa-miR-106b-3p	INPP5D	-0.0584294	0.801369	0.933643	0.71454	1.33337	0.00232566	NA	NA	NA	NA
hsa-miR-106b-3p	SIRT1	-0.061769	0.790253	0.945232	0.703658	1.33337	0.00232566	NA	NA	NA	NA
hsa-miR-106b-3p	TGFB1	-0.124569	0.590579	0.887273	0.585925	1.33337	0.00232566	NA	NA	NA	NA
hsa-miR-106b-3p	GDF5	-0.160955	0.485811	1.23117	0.309402	1.33337	0.00232566	NA	NA	NA	NA
hsa-miR-106b-3p	ACVR2B	-0.184897	0.422335	0.958292	0.798923	1.33337	0.00232566	NA	NA	NA	NA
hsa-miR-106b-3p	SOX9	-0.225949	0.324703	0.862275	0.223147	1.33337	0.00232566	NA	NA	NA	NA
hsa-miR-106b-5p	CHRDL1	0.426962	0.0535628	1.49435	0.292121	2.52264	0.000994222	NA	NA	NA	NA
hsa-miR-106b-5p	INPP5D	0.376933	0.0921156	0.933643	0.71454	2.52264	0.000994222	NA	NA	NA	NA
hsa-miR-106b-5p	IL1B	0.271052	0.234649	0.864069	0.884336	2.52264	0.000994222	NA	NA	NA	NA
hsa-miR-106b-5p	GAS5	0.261053	0.253039	1.0647	0.746685	2.52264	0.000994222	NA	NA	NA	NA
hsa-miR-106b-5p	SMAD4	0.0923881	0.690406	1.08483	0.392856	2.52264	0.000994222	NA	NA	PAR-CLIP	PAR-CLIP
hsa-miR-106b-5p	ACVR2B	0.0727687	0.753928	0.958292	0.798923	2.52264	0.000994222	NA	NA	NA	NA
hsa-miR-106b-5p	CEBPB	0.0713042	0.758737	0.939753	0.736829	2.52264	0.000994222	NA	NA	NA	NA
hsa-miR-106b-5p	MMP13	0.00401487	0.98622	0.895583	0.834042	2.52264	0.000994222	NA	NA	NA	NA
hsa-miR-106b-5p	IGFBP5	-0.0188923	0.935218	1.29452	0.177581	2.52264	0.000994222	NA	NA	HITS-CLIP	NA
hsa-miR-106b-5p	BCL2	-0.0613382	0.791685	1.1389	0.259904	2.52264	0.000994222	NA	NA	NA	NA
hsa-miR-106b-5p	SOX9	-0.109069	0.637914	0.862275	0.223147	2.52264	0.000994222	NA	NA	NA	NA
hsa-miR-106b-5p	COL2A1	-0.116223	0.615883	1.00858	0.986423	2.52264	0.000994222	NA	NA	NA	NA
hsa-miR-106b-5p	SIRT1	-0.139282	0.547086	0.945232	0.703658	2.52264	0.000994222	NA	NA	NA	NA
hsa-miR-106b-5p	ADAMTS5	-0.156882	0.497058	1.36417	0.016705	2.52264	0.000994222	-0.01	NA	HITS-CLIP	NA
hsa-miR-106b-5p	SMAD2	-0.181807	0.430267	1.18533	0.0540127	2.52264	0.000994222	NA	NA	NA	NA
hsa-miR-106b-5p	TGFB1	-0.284683	0.211017	0.887273	0.585925	2.52264	0.000994222	NA	NA	NA	NA
hsa-miR-106b-5p	VEGFA	-0.307342	0.175338	1.17721	0.27403	2.52264	0.000994222	-0.158	NA	Luciferase Reporter Assay	Microarray
hsa-miR-106b-5p	GDF5	-0.526441	0.0142206	1.23117	0.309402	2.52264	0.000994222	NA	NA	NA	NA
hsa-miR-107	CHRDL1	0.327277	0.147569	1.49435	0.292121	1.68904	4.40967e-05	NA	NA	NA	NA
hsa-miR-107	GAS5	0.246974	0.280451	1.0647	0.746685	1.68904	4.40967e-05	NA	NA	NA	NA
hsa-miR-107	BCL2	0.214984	0.349345	1.1389	0.259904	1.68904	4.40967e-05	NA	NA	NA	NA
hsa-miR-107	COL2A1	0.133705	0.563399	1.00858	0.986423	1.68904	4.40967e-05	NA	NA	NA	NA
hsa-miR-107	SOX9	0.124313	0.591351	0.862275	0.223147	1.68904	4.40967e-05	NA	NA	NA	NA
hsa-miR-107	INPP5D	0.074782	0.74733	0.933643	0.71454	1.68904	4.40967e-05	NA	NA	NA	NA
hsa-miR-107	SMAD4	0.072902	0.75349	1.08483	0.392856	1.68904	4.40967e-05	NA	NA	HITS-CLIP	NA
hsa-miR-107	CEBPB	0.0612864	0.791857	0.939753	0.736829	1.68904	4.40967e-05	NA	NA	NA	NA
hsa-miR-107	ACVR2B	-0.0112957	0.961242	0.958292	0.798923	1.68904	4.40967e-05	-0.399	NA	PAR-CLIP	PAR-CLIP
hsa-miR-107	IL1B	-0.0248869	0.914726	0.864069	0.884336	1.68904	4.40967e-05	NA	NA	NA	NA
hsa-miR-107	IGFBP5	-0.0832187	0.719874	1.29452	0.177581	1.68904	4.40967e-05	NA	NA	NA	NA
hsa-miR-107	SIRT1	-0.0945376	0.683558	0.945232	0.703658	1.68904	4.40967e-05	NA	NA	NA	NA
hsa-miR-107	MMP13	-0.162538	0.481472	0.895583	0.834042	1.68904	4.40967e-05	NA	NA	NA	NA
hsa-miR-107	VEGFA	-0.183552	0.425778	1.17721	0.27403	1.68904	4.40967e-05	NA	NA	NA	ELISA//Luciferase reporter assay
hsa-miR-107	TGFB1	-0.256896	0.260948	0.887273	0.585925	1.68904	4.40967e-05	NA	NA	HITS-CLIP	NA
hsa-miR-107	GDF5	-0.262955	0.249471	1.23117	0.309402	1.68904	4.40967e-05	NA	NA	NA	NA
hsa-miR-107	SMAD2	-0.342548	0.128499	1.18533	0.0540127	1.68904	4.40967e-05	NA	NA	NA	NA
hsa-miR-107	ADAMTS5	-0.350633	0.119147	1.36417	0.016705	1.68904	4.40967e-05	NA	NA	NA	NA
hsa-miR-10a-5p	IL1B	0.591339	0.00475327	0.864069	0.884336	1.76618	0.0076139	NA	NA	NA	NA
hsa-miR-10a-5p	INPP5D	0.476669	0.0289109	0.933643	0.71454	1.76618	0.0076139	NA	NA	NA	NA
hsa-miR-10a-5p	GAS5	0.424268	0.0552545	1.0647	0.746685	1.76618	0.0076139	NA	NA	NA	NA
hsa-miR-10a-5p	CEBPB	0.353134	0.116355	0.939753	0.736829	1.76618	0.0076139	NA	NA	NA	NA
hsa-miR-10a-5p	MMP13	0.349466	0.120465	0.895583	0.834042	1.76618	0.0076139	NA	NA	NA	NA
hsa-miR-10a-5p	ADAMTS5	0.205744	0.37093	1.36417	0.016705	1.76618	0.0076139	NA	NA	NA	NA
hsa-miR-10a-5p	CHRDL1	0.165695	0.47288	1.49435	0.292121	1.76618	0.0076139	NA	NA	NA	NA
hsa-miR-10a-5p	TGFB1	-0.00644991	0.977864	0.887273	0.585925	1.76618	0.0076139	NA	NA	NA	NA
hsa-miR-10a-5p	ACVR2B	-0.203445	0.376417	0.958292	0.798923	1.76618	0.0076139	NA	NA	NA	NA
hsa-miR-10a-5p	SMAD4	-0.240149	0.294381	1.08483	0.392856	1.76618	0.0076139	NA	NA	NA	NA
hsa-miR-10a-5p	GDF5	-0.377631	0.0914667	1.23117	0.309402	1.76618	0.0076139	NA	NA	NA	NA
hsa-miR-10a-5p	IGFBP5	-0.407282	0.0668768	1.29452	0.177581	1.76618	0.0076139	NA	NA	NA	NA
hsa-miR-10a-5p	COL2A1	-0.434183	0.0492245	1.00858	0.986423	1.76618	0.0076139	NA	NA	NA	NA
hsa-miR-10a-5p	SMAD2	-0.448079	0.0416422	1.18533	0.0540127	1.76618	0.0076139	-0.209	NA	NA	NA
hsa-miR-10a-5p	SIRT1	-0.563142	0.00785862	0.945232	0.703658	1.76618	0.0076139	NA	NA	NA	NA
hsa-miR-10a-5p	VEGFA	-0.577383	0.00612994	1.17721	0.27403	1.76618	0.0076139	NA	NA	NA	NA
hsa-miR-10a-5p	BCL2	-0.634803	0.00199219	1.1389	0.259904	1.76618	0.0076139	NA	NA	NA	NA
hsa-miR-10a-5p	SOX9	-0.67121	0.00086493	0.862275	0.223147	1.76618	0.0076139	NA	NA	NA	NA
hsa-miR-10b-5p	GAS5	0.58857	0.00500374	1.0647	0.746685	1.98566	0.000140762	NA	NA	NA	NA
hsa-miR-10b-5p	CEBPB	0.126489	0.584822	0.939753	0.736829	1.98566	0.000140762	NA	NA	NA	NA
hsa-miR-10b-5p	TGFB1	0.079505	0.731921	0.887273	0.585925	1.98566	0.000140762	NA	NA	NA	NA
hsa-miR-10b-5p	IL1B	-0.0284911	0.90243	0.864069	0.884336	1.98566	0.000140762	NA	NA	NA	NA
hsa-miR-10b-5p	BCL2	-0.0295395	0.898857	1.1389	0.259904	1.98566	0.000140762	NA	NA	NA	NA
hsa-miR-10b-5p	SOX9	-0.058947	0.799643	0.862275	0.223147	1.98566	0.000140762	NA	NA	NA	NA
hsa-miR-10b-5p	INPP5D	-0.137563	0.552091	0.933643	0.71454	1.98566	0.000140762	NA	NA	NA	NA
hsa-miR-10b-5p	SIRT1	-0.185024	0.422013	0.945232	0.703658	1.98566	0.000140762	NA	NA	NA	NA
hsa-miR-10b-5p	COL2A1	-0.24274	0.289045	1.00858	0.986423	1.98566	0.000140762	NA	NA	NA	NA
hsa-miR-10b-5p	SMAD2	-0.257451	0.259882	1.18533	0.0540127	1.98566	0.000140762	-0.201	NA	NA	NA
hsa-miR-10b-5p	CHRDL1	-0.263311	0.248808	1.49435	0.292121	1.98566	0.000140762	NA	NA	NA	NA
hsa-miR-10b-5p	MMP13	-0.284562	0.211218	0.895583	0.834042	1.98566	0.000140762	NA	NA	NA	NA
hsa-miR-10b-5p	SMAD4	-0.310729	0.170386	1.08483	0.392856	1.98566	0.000140762	NA	NA	NA	NA
hsa-miR-10b-5p	VEGFA	-0.389528	0.0809074	1.17721	0.27403	1.98566	0.000140762	NA	NA	NA	NA
hsa-miR-10b-5p	ADAMTS5	-0.435268	0.0485967	1.36417	0.016705	1.98566	0.000140762	NA	NA	NA	NA
hsa-miR-10b-5p	ACVR2B	-0.468008	0.0323892	0.958292	0.798923	1.98566	0.000140762	NA	NA	NA	NA
hsa-miR-10b-5p	GDF5	-0.468729	0.0320877	1.23117	0.309402	1.98566	0.000140762	NA	NA	NA	NA
hsa-miR-10b-5p	IGFBP5	-0.501148	0.0206521	1.29452	0.177581	1.98566	0.000140762	NA	NA	NA	NA
hsa-miR-1247-3p	ACVR2B	0.43251	0.0502047	0.958292	0.798923	0.650695	0.0448813	NA	NA	NA	NA
hsa-miR-1247-3p	IGFBP5	0.428618	0.052543	1.29452	0.177581	0.650695	0.0448813	NA	NA	NA	NA
hsa-miR-1247-3p	SMAD4	0.345982	0.124465	1.08483	0.392856	0.650695	0.0448813	NA	NA	NA	NA
hsa-miR-1247-3p	CHRDL1	0.319635	0.157823	1.49435	0.292121	0.650695	0.0448813	NA	NA	NA	NA
hsa-miR-1247-3p	INPP5D	0.292248	0.198608	0.933643	0.71454	0.650695	0.0448813	NA	NA	NA	NA
hsa-miR-1247-3p	SMAD2	0.203296	0.376774	1.18533	0.0540127	0.650695	0.0448813	NA	NA	NA	NA
hsa-miR-1247-3p	ADAMTS5	0.186217	0.418972	1.36417	0.016705	0.650695	0.0448813	NA	NA	NA	NA
hsa-miR-1247-3p	IL1B	0.15531	0.501433	0.864069	0.884336	0.650695	0.0448813	NA	NA	NA	NA
hsa-miR-1247-3p	SIRT1	0.118148	0.610007	0.945232	0.703658	0.650695	0.0448813	NA	NA	NA	NA
hsa-miR-1247-3p	GAS5	0.0188751	0.935277	1.0647	0.746685	0.650695	0.0448813	NA	NA	NA	NA
hsa-miR-1247-3p	MMP13	-0.0520119	0.822832	0.895583	0.834042	0.650695	0.0448813	NA	NA	NA	NA
hsa-miR-1247-3p	CEBPB	-0.143156	0.535881	0.939753	0.736829	0.650695	0.0448813	NA	NA	NA	NA
hsa-miR-1247-3p	BCL2	-0.151592	0.511854	1.1389	0.259904	0.650695	0.0448813	NA	NA	NA	NA
hsa-miR-1247-3p	VEGFA	-0.172776	0.453896	1.17721	0.27403	0.650695	0.0448813	NA	NA	NA	NA
hsa-miR-1247-3p	COL2A1	-0.174458	0.449444	1.00858	0.986423	0.650695	0.0448813	NA	NA	NA	NA
hsa-miR-1247-3p	SOX9	-0.176761	0.443387	0.862275	0.223147	0.650695	0.0448813	NA	NA	NA	NA
hsa-miR-1247-3p	GDF5	-0.228561	0.318991	1.23117	0.309402	0.650695	0.0448813	NA	NA	NA	NA
hsa-miR-1247-3p	TGFB1	-0.324074	0.151808	0.887273	0.585925	0.650695	0.0448813	NA	NA	NA	NA
hsa-miR-1247-5p	ACVR2B	0.356782	0.11237	0.958292	0.798923	0.379289	1.21891e-06	NA	NA	NA	NA
hsa-miR-1247-5p	IGFBP5	0.320952	0.156021	1.29452	0.177581	0.379289	1.21891e-06	NA	NA	NA	NA
hsa-miR-1247-5p	SMAD4	0.308922	0.173016	1.08483	0.392856	0.379289	1.21891e-06	NA	NA	NA	NA
hsa-miR-1247-5p	CHRDL1	0.279567	0.219694	1.49435	0.292121	0.379289	1.21891e-06	NA	NA	NA	NA
hsa-miR-1247-5p	SOX9	0.212213	0.355739	0.862275	0.223147	0.379289	1.21891e-06	NA	NA	NA	Luciferase reporter assay//qRT-PCR//Western blot
hsa-miR-1247-5p	INPP5D	0.192856	0.402274	0.933643	0.71454	0.379289	1.21891e-06	NA	NA	NA	NA
hsa-miR-1247-5p	BCL2	0.191381	0.405953	1.1389	0.259904	0.379289	1.21891e-06	NA	NA	NA	NA
hsa-miR-1247-5p	SIRT1	0.180689	0.433155	0.945232	0.703658	0.379289	1.21891e-06	NA	NA	NA	NA
hsa-miR-1247-5p	SMAD2	0.177043	0.442649	1.18533	0.0540127	0.379289	1.21891e-06	NA	NA	NA	NA
hsa-miR-1247-5p	COL2A1	0.0789391	0.733762	1.00858	0.986423	0.379289	1.21891e-06	NA	NA	NA	NA
hsa-miR-1247-5p	GAS5	-0.0487034	0.833945	1.0647	0.746685	0.379289	1.21891e-06	NA	NA	NA	NA
hsa-miR-1247-5p	IL1B	-0.0667152	0.773862	0.864069	0.884336	0.379289	1.21891e-06	NA	NA	NA	NA
hsa-miR-1247-5p	VEGFA	-0.173067	0.453124	1.17721	0.27403	0.379289	1.21891e-06	NA	NA	NA	NA
hsa-miR-1247-5p	ADAMTS5	-0.188693	0.412702	1.36417	0.016705	0.379289	1.21891e-06	NA	NA	NA	NA
hsa-miR-1247-5p	TGFB1	-0.200538	0.383419	0.887273	0.585925	0.379289	1.21891e-06	NA	NA	NA	NA
hsa-miR-1247-5p	CEBPB	-0.202538	0.378595	0.939753	0.736829	0.379289	1.21891e-06	NA	NA	NA	NA
hsa-miR-1247-5p	MMP13	-0.218324	0.341726	0.895583	0.834042	0.379289	1.21891e-06	NA	NA	NA	NA
hsa-miR-1247-5p	GDF5	-0.267492	0.241094	1.23117	0.309402	0.379289	1.21891e-06	NA	NA	NA	NA
hsa-miR-125a-5p	TGFB1	0.50167	0.0204992	0.887273	0.585925	0.616968	0.000112617	NA	NA	NA	NA
hsa-miR-125a-5p	SMAD2	0.450179	0.0405804	1.18533	0.0540127	0.616968	0.000112617	-0.226	NA	NA	NA
hsa-miR-125a-5p	GDF5	0.324309	0.151493	1.23117	0.309402	0.616968	0.000112617	NA	NA	NA	NA
hsa-miR-125a-5p	BCL2	0.308097	0.174225	1.1389	0.259904	0.616968	0.000112617	-0.131	NA	NA	NA
hsa-miR-125a-5p	IGFBP5	0.29404	0.195742	1.29452	0.177581	0.616968	0.000112617	NA	NA	NA	NA
hsa-miR-125a-5p	VEGFA	0.257478	0.25983	1.17721	0.27403	0.616968	0.000112617	NA	NA	HITS-CLIP	ELISA//Luciferase reporter assay
hsa-miR-125a-5p	COL2A1	0.233509	0.308336	1.00858	0.986423	0.616968	0.000112617	NA	NA	NA	NA
hsa-miR-125a-5p	SMAD4	0.177788	0.440701	1.08483	0.392856	0.616968	0.000112617	NA	NA	NA	Luciferase reporter assay//Western blot
hsa-miR-125a-5p	SIRT1	0.165174	0.474292	0.945232	0.703658	0.616968	0.000112617	NA	NA	NA	NA
hsa-miR-125a-5p	SOX9	0.100923	0.663356	0.862275	0.223147	0.616968	0.000112617	NA	NA	NA	NA
hsa-miR-125a-5p	ADAMTS5	0.0528228	0.820112	1.36417	0.016705	0.616968	0.000112617	NA	NA	HITS-CLIP	NA
hsa-miR-125a-5p	ACVR2B	0.0361354	0.876424	0.958292	0.798923	0.616968	0.000112617	-0.076	NA	NA	NA
hsa-miR-125a-5p	CHRDL1	-0.00305669	0.989508	1.49435	0.292121	0.616968	0.000112617	NA	NA	NA	NA
hsa-miR-125a-5p	CEBPB	-0.132677	0.566432	0.939753	0.736829	0.616968	0.000112617	NA	NA	NA	NA
hsa-miR-125a-5p	MMP13	-0.154874	0.502651	0.895583	0.834042	0.616968	0.000112617	NA	NA	NA	NA
hsa-miR-125a-5p	IL1B	-0.22911	0.317797	0.864069	0.884336	0.616968	0.000112617	NA	NA	NA	NA
hsa-miR-125a-5p	INPP5D	-0.288462	0.204756	0.933643	0.71454	0.616968	0.000112617	NA	NA	NA	NA
hsa-miR-125a-5p	GAS5	-0.324923	0.150676	1.0647	0.746685	0.616968	0.000112617	NA	NA	NA	NA
hsa-miR-125b-2-3p	ACVR2B	0.380664	0.0886833	0.958292	0.798923	0.691798	2.77114e-05	NA	NA	NA	NA
hsa-miR-125b-2-3p	IGFBP5	0.351733	0.117913	1.29452	0.177581	0.691798	2.77114e-05	NA	NA	NA	NA
hsa-miR-125b-2-3p	BCL2	0.344148	0.126607	1.1389	0.259904	0.691798	2.77114e-05	NA	NA	NA	NA
hsa-miR-125b-2-3p	SOX9	0.320725	0.15633	0.862275	0.223147	0.691798	2.77114e-05	NA	NA	NA	NA
hsa-miR-125b-2-3p	CHRDL1	0.317719	0.160469	1.49435	0.292121	0.691798	2.77114e-05	NA	NA	NA	NA
hsa-miR-125b-2-3p	SMAD4	0.298148	0.189278	1.08483	0.392856	0.691798	2.77114e-05	NA	NA	NA	NA
hsa-miR-125b-2-3p	SIRT1	0.25034	0.273737	0.945232	0.703658	0.691798	2.77114e-05	NA	NA	NA	NA
hsa-miR-125b-2-3p	COL2A1	0.228785	0.318504	1.00858	0.986423	0.691798	2.77114e-05	NA	NA	NA	NA
hsa-miR-125b-2-3p	SMAD2	0.140031	0.544909	1.18533	0.0540127	0.691798	2.77114e-05	NA	NA	NA	NA
hsa-miR-125b-2-3p	INPP5D	0.114949	0.619782	0.933643	0.71454	0.691798	2.77114e-05	NA	NA	NA	NA
hsa-miR-125b-2-3p	GAS5	-0.0784447	0.735372	1.0647	0.746685	0.691798	2.77114e-05	NA	NA	NA	NA
hsa-miR-125b-2-3p	VEGFA	-0.108554	0.639508	1.17721	0.27403	0.691798	2.77114e-05	NA	NA	NA	NA
hsa-miR-125b-2-3p	GDF5	-0.185571	0.420617	1.23117	0.309402	0.691798	2.77114e-05	NA	NA	NA	NA
hsa-miR-125b-2-3p	IL1B	-0.258658	0.257575	0.864069	0.884336	0.691798	2.77114e-05	NA	NA	NA	NA
hsa-miR-125b-2-3p	TGFB1	-0.283253	0.213418	0.887273	0.585925	0.691798	2.77114e-05	NA	NA	NA	NA
hsa-miR-125b-2-3p	CEBPB	-0.335252	0.137376	0.939753	0.736829	0.691798	2.77114e-05	NA	NA	NA	NA
hsa-miR-125b-2-3p	ADAMTS5	-0.376938	0.0921112	1.36417	0.016705	0.691798	2.77114e-05	NA	NA	NA	NA
hsa-miR-125b-2-3p	MMP13	-0.394796	0.076534	0.895583	0.834042	0.691798	2.77114e-05	NA	NA	NA	NA
hsa-miR-125b-5p	TGFB1	0.406452	0.0674886	0.887273	0.585925	0.665333	0.000180555	NA	NA	NA	NA
hsa-miR-125b-5p	GDF5	0.373837	0.0950387	1.23117	0.309402	0.665333	0.000180555	NA	NA	NA	NA
hsa-miR-125b-5p	SMAD2	0.354321	0.115047	1.18533	0.0540127	0.665333	0.000180555	-0.226	NA	NA	NA
hsa-miR-125b-5p	IGFBP5	0.341434	0.129827	1.29452	0.177581	0.665333	0.000180555	NA	NA	NA	NA
hsa-miR-125b-5p	BCL2	0.341055	0.13028	1.1389	0.259904	0.665333	0.000180555	-0.131	NA	NA	Luciferase reporter assay//Western blot
hsa-miR-125b-5p	COL2A1	0.303546	0.181005	1.00858	0.986423	0.665333	0.000180555	NA	NA	NA	NA
hsa-miR-125b-5p	VEGFA	0.295223	0.193866	1.17721	0.27403	0.665333	0.000180555	NA	NA	HITS-CLIP	NA
hsa-miR-125b-5p	SMAD4	0.232075	0.311401	1.08483	0.392856	0.665333	0.000180555	NA	NA	NA	Luciferase reporter assay//Western blot
hsa-miR-125b-5p	SIRT1	0.163748	0.478171	0.945232	0.703658	0.665333	0.000180555	NA	NA	NA	NA
hsa-miR-125b-5p	SOX9	0.0987795	0.670114	0.862275	0.223147	0.665333	0.000180555	NA	NA	NA	NA
hsa-miR-125b-5p	CHRDL1	0.0986602	0.670491	1.49435	0.292121	0.665333	0.000180555	NA	NA	NA	NA
hsa-miR-125b-5p	ADAMTS5	0.0553945	0.811502	1.36417	0.016705	0.665333	0.000180555	NA	NA	HITS-CLIP	NA
hsa-miR-125b-5p	ACVR2B	0.0339606	0.883812	0.958292	0.798923	0.665333	0.000180555	-0.088	NA	NA	NA
hsa-miR-125b-5p	CEBPB	-0.0674193	0.771536	0.939753	0.736829	0.665333	0.000180555	NA	NA	NA	NA
hsa-miR-125b-5p	MMP13	-0.169771	0.461903	0.895583	0.834042	0.665333	0.000180555	NA	NA	NA	Luciferase reporter assay
hsa-miR-125b-5p	GAS5	-0.228622	0.318858	1.0647	0.746685	0.665333	0.000180555	NA	NA	NA	NA
hsa-miR-125b-5p	IL1B	-0.257411	0.25996	0.864069	0.884336	0.665333	0.000180555	NA	NA	NA	NA
hsa-miR-125b-5p	INPP5D	-0.317595	0.160642	0.933643	0.71454	0.665333	0.000180555	NA	NA	NA	NA
hsa-miR-126-3p	IL1B	0.570464	0.00692569	0.864069	0.884336	2.00898	0.0059877	NA	NA	NA	NA
hsa-miR-126-3p	INPP5D	0.454397	0.0385107	0.933643	0.71454	2.00898	0.0059877	NA	NA	NA	NA
hsa-miR-126-3p	ADAMTS5	0.316688	0.161906	1.36417	0.016705	2.00898	0.0059877	NA	NA	NA	NA
hsa-miR-126-3p	MMP13	0.286867	0.207382	0.895583	0.834042	2.00898	0.0059877	NA	NA	NA	NA
hsa-miR-126-3p	GAS5	0.272481	0.232094	1.0647	0.746685	2.00898	0.0059877	NA	NA	NA	NA
hsa-miR-126-3p	CEBPB	0.233706	0.307916	0.939753	0.736829	2.00898	0.0059877	NA	NA	NA	NA
hsa-miR-126-3p	TGFB1	0.201723	0.380558	0.887273	0.585925	2.00898	0.0059877	NA	NA	NA	NA
hsa-miR-126-3p	CHRDL1	0.0604097	0.794773	1.49435	0.292121	2.00898	0.0059877	NA	NA	NA	NA
hsa-miR-126-3p	SMAD4	-0.0881305	0.704038	1.08483	0.392856	2.00898	0.0059877	NA	NA	NA	NA
hsa-miR-126-3p	SMAD2	-0.10311	0.656489	1.18533	0.0540127	2.00898	0.0059877	NA	NA	NA	NA
hsa-miR-126-3p	ACVR2B	-0.139427	0.546664	0.958292	0.798923	2.00898	0.0059877	NA	NA	NA	HITS-CLIP
hsa-miR-126-3p	IGFBP5	-0.252273	0.269925	1.29452	0.177581	2.00898	0.0059877	NA	NA	NA	NA
hsa-miR-126-3p	SIRT1	-0.275385	0.226958	0.945232	0.703658	2.00898	0.0059877	NA	NA	NA	Luciferase reporter assay//qRT-PCR//Western blot
hsa-miR-126-3p	SOX9	-0.457773	0.0369146	0.862275	0.223147	2.00898	0.0059877	NA	NA	NA	NA
hsa-miR-126-3p	COL2A1	-0.461102	0.0353913	1.00858	0.986423	2.00898	0.0059877	NA	NA	NA	NA
hsa-miR-126-3p	VEGFA	-0.523241	0.0149307	1.17721	0.27403	2.00898	0.0059877	NA	NA	Western Blot	Luciferase reporter assay
hsa-miR-126-3p	BCL2	-0.54333	0.0109114	1.1389	0.259904	2.00898	0.0059877	NA	NA	NA	In situ hybridization//Luciferase reporter assay//Microarray//Northern blot//qRT-PCR//Western blot
hsa-miR-126-3p	GDF5	-0.646943	0.00152626	1.23117	0.309402	2.00898	0.0059877	NA	NA	NA	NA
hsa-miR-126-5p	INPP5D	0.450248	0.040546	0.933643	0.71454	3.07516	0.000643963	NA	NA	HITS-CLIP	NA
hsa-miR-126-5p	IL1B	0.333169	0.13999	0.864069	0.884336	3.07516	0.000643963	NA	NA	NA	NA
hsa-miR-126-5p	CHRDL1	0.23535	0.304427	1.49435	0.292121	3.07516	0.000643963	NA	NA	NA	NA
hsa-miR-126-5p	ACVR2B	0.173878	0.450977	0.958292	0.798923	3.07516	0.000643963	NA	NA	NA	NA
hsa-miR-126-5p	GAS5	0.166027	0.471981	1.0647	0.746685	3.07516	0.000643963	NA	NA	NA	NA
hsa-miR-126-5p	ADAMTS5	0.139249	0.54718	1.36417	0.016705	3.07516	0.000643963	NA	NA	NA	NA
hsa-miR-126-5p	SMAD4	0.1009	0.663431	1.08483	0.392856	3.07516	0.000643963	NA	NA	NA	NA
hsa-miR-126-5p	MMP13	0.0654803	0.777946	0.895583	0.834042	3.07516	0.000643963	NA	NA	NA	NA
hsa-miR-126-5p	IGFBP5	-0.0226508	0.922365	1.29452	0.177581	3.07516	0.000643963	NA	NA	NA	NA
hsa-miR-126-5p	SIRT1	-0.032861	0.88755	0.945232	0.703658	3.07516	0.000643963	NA	NA	PAR-CLIP	NA
hsa-miR-126-5p	SMAD2	-0.074648	0.747769	1.18533	0.0540127	3.07516	0.000643963	NA	NA	NA	NA
hsa-miR-126-5p	CEBPB	-0.0853887	0.712864	0.939753	0.736829	3.07516	0.000643963	NA	NA	NA	NA
hsa-miR-126-5p	TGFB1	-0.0938153	0.685856	0.887273	0.585925	3.07516	0.000643963	NA	NA	NA	NA
hsa-miR-126-5p	SOX9	-0.21109	0.35835	0.862275	0.223147	3.07516	0.000643963	NA	NA	NA	NA
hsa-miR-126-5p	BCL2	-0.260572	0.253946	1.1389	0.259904	3.07516	0.000643963	NA	NA	PAR-CLIP	NA
hsa-miR-126-5p	COL2A1	-0.433672	0.0495224	1.00858	0.986423	3.07516	0.000643963	NA	NA	NA	NA
hsa-miR-126-5p	VEGFA	-0.465241	0.0335671	1.17721	0.27403	3.07516	0.000643963	NA	NA	HITS-CLIP	NA
hsa-miR-126-5p	GDF5	-0.714523	0.000273542	1.23117	0.309402	3.07516	0.000643963	NA	NA	NA	NA
hsa-miR-127-3p	IGFBP5	0.305631	0.177877	1.29452	0.177581	0.51383	1.10448e-06	NA	NA	NA	NA
hsa-miR-127-3p	IL1B	0.290246	0.201842	0.864069	0.884336	0.51383	1.10448e-06	NA	NA	NA	NA
hsa-miR-127-3p	ADAMTS5	0.268121	0.239947	1.36417	0.016705	0.51383	1.10448e-06	NA	NA	NA	NA
hsa-miR-127-3p	ACVR2B	0.182308	0.428977	0.958292	0.798923	0.51383	1.10448e-06	NA	NA	NA	NA
hsa-miR-127-3p	SMAD4	0.179528	0.436167	1.08483	0.392856	0.51383	1.10448e-06	NA	NA	NA	NA
hsa-miR-127-3p	GDF5	0.171987	0.45599	1.23117	0.309402	0.51383	1.10448e-06	NA	NA	NA	NA
hsa-miR-127-3p	SMAD2	0.168237	0.46602	1.18533	0.0540127	0.51383	1.10448e-06	NA	NA	NA	NA
hsa-miR-127-3p	INPP5D	0.160218	0.487835	0.933643	0.71454	0.51383	1.10448e-06	NA	NA	NA	NA
hsa-miR-127-3p	MMP13	0.149751	0.517054	0.895583	0.834042	0.51383	1.10448e-06	NA	NA	NA	Luciferase reporter assay
hsa-miR-127-3p	CHRDL1	0.115535	0.617988	1.49435	0.292121	0.51383	1.10448e-06	NA	NA	NA	NA
hsa-miR-127-3p	CEBPB	0.105083	0.650317	0.939753	0.736829	0.51383	1.10448e-06	NA	NA	NA	NA
hsa-miR-127-3p	COL2A1	0.00775889	0.973373	1.00858	0.986423	0.51383	1.10448e-06	NA	NA	NA	NA
hsa-miR-127-3p	VEGFA	-0.0440515	0.849623	1.17721	0.27403	0.51383	1.10448e-06	NA	NA	NA	NA
hsa-miR-127-3p	GAS5	-0.054295	0.815181	1.0647	0.746685	0.51383	1.10448e-06	NA	NA	NA	NA
hsa-miR-127-3p	TGFB1	-0.0886424	0.702394	0.887273	0.585925	0.51383	1.10448e-06	NA	NA	NA	NA
hsa-miR-127-3p	SIRT1	-0.180077	0.434741	0.945232	0.703658	0.51383	1.10448e-06	NA	NA	NA	NA
hsa-miR-127-3p	BCL2	-0.301629	0.183914	1.1389	0.259904	0.51383	1.10448e-06	NA	NA	NA	NA
hsa-miR-127-3p	SOX9	-0.380999	0.0883798	0.862275	0.223147	0.51383	1.10448e-06	NA	NA	NA	NA
hsa-miR-1291	SMAD2	0.43975	0.0460692	1.18533	0.0540127	0.641666	0.0100235	NA	NA	NA	NA
hsa-miR-1291	IGFBP5	0.376456	0.0925624	1.29452	0.177581	0.641666	0.0100235	NA	NA	NA	NA
hsa-miR-1291	SMAD4	0.314307	0.165258	1.08483	0.392856	0.641666	0.0100235	NA	NA	NA	NA
hsa-miR-1291	COL2A1	0.29869	0.188436	1.00858	0.986423	0.641666	0.0100235	NA	NA	NA	NA
hsa-miR-1291	CHRDL1	0.295445	0.193515	1.49435	0.292121	0.641666	0.0100235	NA	NA	NA	NA
hsa-miR-1291	SIRT1	0.213393	0.353008	0.945232	0.703658	0.641666	0.0100235	NA	NA	NA	NA
hsa-miR-1291	BCL2	0.195738	0.395142	1.1389	0.259904	0.641666	0.0100235	NA	NA	NA	NA
hsa-miR-1291	ACVR2B	0.180809	0.432845	0.958292	0.798923	0.641666	0.0100235	NA	NA	NA	NA
hsa-miR-1291	ADAMTS5	0.156736	0.497464	1.36417	0.016705	0.641666	0.0100235	NA	NA	NA	NA
hsa-miR-1291	SOX9	0.13377	0.563209	0.862275	0.223147	0.641666	0.0100235	NA	NA	NA	NA
hsa-miR-1291	INPP5D	0.10654	0.645771	0.933643	0.71454	0.641666	0.0100235	NA	NA	NA	NA
hsa-miR-1291	VEGFA	0.0769277	0.740318	1.17721	0.27403	0.641666	0.0100235	NA	NA	NA	NA
hsa-miR-1291	GDF5	-0.0611386	0.792348	1.23117	0.309402	0.641666	0.0100235	NA	NA	NA	NA
hsa-miR-1291	MMP13	-0.113291	0.624873	0.895583	0.834042	0.641666	0.0100235	NA	NA	NA	NA
hsa-miR-1291	IL1B	-0.12655	0.584641	0.864069	0.884336	0.641666	0.0100235	NA	NA	NA	NA
hsa-miR-1291	CEBPB	-0.193164	0.401508	0.939753	0.736829	0.641666	0.0100235	NA	NA	NA	NA
hsa-miR-1291	TGFB1	-0.206778	0.368479	0.887273	0.585925	0.641666	0.0100235	NA	NA	NA	NA
hsa-miR-1291	GAS5	-0.283071	0.213725	1.0647	0.746685	0.641666	0.0100235	NA	NA	NA	NA
hsa-miR-133a-3p	ACVR2B	0.428855	0.0523985	0.958292	0.798923	1.7627	0.0267753	NA	NA	NA	NA
hsa-miR-133a-3p	GDF5	0.389945	0.0805552	1.23117	0.309402	1.7627	0.0267753	NA	NA	NA	NA
hsa-miR-133a-3p	MMP13	0.372843	0.0959908	0.895583	0.834042	1.7627	0.0267753	NA	NA	NA	NA
hsa-miR-133a-3p	IGFBP5	0.317621	0.160605	1.29452	0.177581	1.7627	0.0267753	NA	NA	NA	NA
hsa-miR-133a-3p	VEGFA	0.306869	0.176038	1.17721	0.27403	1.7627	0.0267753	NA	NA	NA	Reporter assay
hsa-miR-133a-3p	ADAMTS5	0.293532	0.196551	1.36417	0.016705	1.7627	0.0267753	NA	NA	HITS-CLIP	NA
hsa-miR-133a-3p	INPP5D	0.287562	0.206234	0.933643	0.71454	1.7627	0.0267753	NA	NA	NA	NA
hsa-miR-133a-3p	CHRDL1	0.188797	0.412439	1.49435	0.292121	1.7627	0.0267753	NA	NA	NA	NA
hsa-miR-133a-3p	SMAD4	0.129255	0.576569	1.08483	0.392856	1.7627	0.0267753	NA	NA	NA	NA
hsa-miR-133a-3p	COL2A1	0.0969469	0.675911	1.00858	0.986423	1.7627	0.0267753	NA	NA	NA	NA
hsa-miR-133a-3p	SOX9	0.0780033	0.73681	0.862275	0.223147	1.7627	0.0267753	NA	NA	NA	NA
hsa-miR-133a-3p	CEBPB	0.0392248	0.865947	0.939753	0.736829	1.7627	0.0267753	NA	NA	NA	NA
hsa-miR-133a-3p	IL1B	0.0388764	0.867128	0.864069	0.884336	1.7627	0.0267753	NA	NA	NA	NA
hsa-miR-133a-3p	SIRT1	0.0316985	0.891505	0.945232	0.703658	1.7627	0.0267753	NA	NA	NA	NA
hsa-miR-133a-3p	SMAD2	-0.0438231	0.850394	1.18533	0.0540127	1.7627	0.0267753	NA	NA	NA	NA
hsa-miR-133a-3p	TGFB1	-0.099336	0.668358	0.887273	0.585925	1.7627	0.0267753	NA	NA	NA	NA
hsa-miR-133a-3p	BCL2	-0.175604	0.446425	1.1389	0.259904	1.7627	0.0267753	NA	NA	NA	NA
hsa-miR-133a-3p	GAS5	-0.31533	0.163812	1.0647	0.746685	1.7627	0.0267753	NA	NA	NA	NA
hsa-miR-133b	ACVR2B	0.405776	0.06799	0.958292	0.798923	2.33753	0.00998427	NA	NA	NA	NA
hsa-miR-133b	IGFBP5	0.34699	0.123298	1.29452	0.177581	2.33753	0.00998427	NA	NA	NA	NA
hsa-miR-133b	VEGFA	0.341438	0.129822	1.17721	0.27403	2.33753	0.00998427	NA	NA	NA	NA
hsa-miR-133b	SOX9	0.272163	0.232661	0.862275	0.223147	2.33753	0.00998427	NA	NA	NA	NA
hsa-miR-133b	GDF5	0.254088	0.266378	1.23117	0.309402	2.33753	0.00998427	NA	NA	NA	NA
hsa-miR-133b	COL2A1	0.240648	0.293349	1.00858	0.986423	2.33753	0.00998427	NA	NA	NA	NA
hsa-miR-133b	INPP5D	0.210972	0.358626	0.933643	0.71454	2.33753	0.00998427	NA	NA	NA	NA
hsa-miR-133b	CHRDL1	0.209988	0.360923	1.49435	0.292121	2.33753	0.00998427	NA	NA	NA	NA
hsa-miR-133b	MMP13	0.20271	0.378181	0.895583	0.834042	2.33753	0.00998427	NA	NA	NA	NA
hsa-miR-133b	SIRT1	0.185444	0.42094	0.945232	0.703658	2.33753	0.00998427	-0.147	NA	NA	NA
hsa-miR-133b	SMAD2	0.184568	0.423175	1.18533	0.0540127	2.33753	0.00998427	NA	NA	NA	NA
hsa-miR-133b	ADAMTS5	0.163941	0.477645	1.36417	0.016705	2.33753	0.00998427	-0.129	NA	NA	NA
hsa-miR-133b	SMAD4	0.149793	0.516936	1.08483	0.392856	2.33753	0.00998427	NA	NA	NA	NA
hsa-miR-133b	BCL2	0.056554	0.807627	1.1389	0.259904	2.33753	0.00998427	NA	NA	NA	NA
hsa-miR-133b	IL1B	-0.0910439	0.6947	0.864069	0.884336	2.33753	0.00998427	NA	NA	NA	NA
hsa-miR-133b	CEBPB	-0.133838	0.563009	0.939753	0.736829	2.33753	0.00998427	NA	NA	NA	NA
hsa-miR-133b	TGFB1	-0.190888	0.407186	0.887273	0.585925	2.33753	0.00998427	NA	NA	NA	NA
hsa-miR-133b	GAS5	-0.43491	0.0488032	1.0647	0.746685	2.33753	0.00998427	NA	NA	NA	NA
hsa-miR-134-5p	IGFBP5	0.434741	0.0489012	1.29452	0.177581	0.643078	0.00408192	NA	NA	NA	NA
hsa-miR-134-5p	ACVR2B	0.354376	0.114987	0.958292	0.798923	0.643078	0.00408192	NA	NA	NA	NA
hsa-miR-134-5p	SMAD4	0.353147	0.116342	1.08483	0.392856	0.643078	0.00408192	NA	NA	NA	NA
hsa-miR-134-5p	CHRDL1	0.254385	0.265801	1.49435	0.292121	0.643078	0.00408192	NA	NA	NA	NA
hsa-miR-134-5p	INPP5D	0.221167	0.335319	0.933643	0.71454	0.643078	0.00408192	NA	NA	NA	NA
hsa-miR-134-5p	ADAMTS5	0.197958	0.389696	1.36417	0.016705	0.643078	0.00408192	NA	NA	NA	NA
hsa-miR-134-5p	IL1B	0.16224	0.482286	0.864069	0.884336	0.643078	0.00408192	NA	NA	NA	NA
hsa-miR-134-5p	SMAD2	0.103236	0.656096	1.18533	0.0540127	0.643078	0.00408192	NA	NA	NA	NA
hsa-miR-134-5p	COL2A1	0.0413736	0.858673	1.00858	0.986423	0.643078	0.00408192	NA	NA	NA	NA
hsa-miR-134-5p	MMP13	0.0235841	0.919176	0.895583	0.834042	0.643078	0.00408192	NA	NA	NA	NA
hsa-miR-134-5p	CEBPB	0.0161557	0.944587	0.939753	0.736829	0.643078	0.00408192	NA	NA	NA	NA
hsa-miR-134-5p	GDF5	0.00282356	0.990308	1.23117	0.309402	0.643078	0.00408192	NA	NA	NA	NA
hsa-miR-134-5p	GAS5	0.00034453	0.998817	1.0647	0.746685	0.643078	0.00408192	NA	NA	NA	NA
hsa-miR-134-5p	SIRT1	-0.0143838	0.950657	0.945232	0.703658	0.643078	0.00408192	NA	NA	NA	NA
hsa-miR-134-5p	VEGFA	-0.0699496	0.763193	1.17721	0.27403	0.643078	0.00408192	NA	NA	HITS-CLIP	ELISA//Luciferase reporter assay
hsa-miR-134-5p	BCL2	-0.170049	0.46116	1.1389	0.259904	0.643078	0.00408192	NA	NA	NA	NA
hsa-miR-134-5p	SOX9	-0.210441	0.359865	0.862275	0.223147	0.643078	0.00408192	NA	NA	NA	NA
hsa-miR-134-5p	TGFB1	-0.249273	0.275854	0.887273	0.585925	0.643078	0.00408192	NA	NA	NA	NA
hsa-miR-1-3p	MMP13	0.516069	0.0166266	0.895583	0.834042	4.53838	0.000246855	NA	NA	NA	NA
hsa-miR-1-3p	INPP5D	0.380068	0.0892251	0.933643	0.71454	4.53838	0.000246855	NA	NA	NA	NA
hsa-miR-1-3p	ADAMTS5	0.351717	0.117931	1.36417	0.016705	4.53838	0.000246855	NA	NA	NA	NA
hsa-miR-1-3p	ACVR2B	0.339563	0.13208	0.958292	0.798923	4.53838	0.000246855	-0.185	NA	HITS-CLIP	NA
hsa-miR-1-3p	GDF5	0.235542	0.30402	1.23117	0.309402	4.53838	0.000246855	NA	NA	NA	NA
hsa-miR-1-3p	IL1B	0.19745	0.390939	0.864069	0.884336	4.53838	0.000246855	NA	NA	NA	NA
hsa-miR-1-3p	VEGFA	0.153652	0.506068	1.17721	0.27403	4.53838	0.000246855	-0.199	NA	NA	NA
hsa-miR-1-3p	IGFBP5	0.0642354	0.782069	1.29452	0.177581	4.53838	0.000246855	-0.16	NA	NA	NA
hsa-miR-1-3p	TGFB1	0.0584404	0.801332	0.887273	0.585925	4.53838	0.000246855	NA	NA	NA	NA
hsa-miR-1-3p	CEBPB	0.0468483	0.84019	0.939753	0.736829	4.53838	0.000246855	NA	NA	NA	NA
hsa-miR-1-3p	SMAD4	0.0394805	0.865081	1.08483	0.392856	4.53838	0.000246855	NA	NA	NA	NA
hsa-miR-1-3p	SOX9	-0.000373989	0.998716	0.862275	0.223147	4.53838	0.000246855	-0.281	NA	NA	Luciferase reporter assay
hsa-miR-1-3p	SIRT1	-0.0722315	0.755691	0.945232	0.703658	4.53838	0.000246855	NA	NA	NA	NA
hsa-miR-1-3p	CHRDL1	-0.108829	0.638657	1.49435	0.292121	4.53838	0.000246855	NA	NA	NA	NA
hsa-miR-1-3p	SMAD2	-0.185559	0.420647	1.18533	0.0540127	4.53838	0.000246855	-0.072	NA	NA	NA
hsa-miR-1-3p	COL2A1	-0.211296	0.357872	1.00858	0.986423	4.53838	0.000246855	NA	NA	NA	NA
hsa-miR-1-3p	GAS5	-0.261295	0.252582	1.0647	0.746685	4.53838	0.000246855	NA	NA	NA	NA
hsa-miR-1-3p	BCL2	-0.316491	0.162181	1.1389	0.259904	4.53838	0.000246855	NA	NA	NA	NA
hsa-miR-140-3p	COL2A1	0.419952	0.0580492	1.00858	0.986423	0.80548	0.0136086	NA	NA	NA	NA
hsa-miR-140-3p	GDF5	0.372563	0.0962605	1.23117	0.309402	0.80548	0.0136086	NA	NA	NA	NA
hsa-miR-140-3p	VEGFA	0.329852	0.144222	1.17721	0.27403	0.80548	0.0136086	NA	NA	NA	NA
hsa-miR-140-3p	BCL2	0.321306	0.155539	1.1389	0.259904	0.80548	0.0136086	NA	NA	NA	NA
hsa-miR-140-3p	IGFBP5	0.290276	0.201794	1.29452	0.177581	0.80548	0.0136086	NA	NA	NA	NA
hsa-miR-140-3p	SOX9	0.230252	0.315325	0.862275	0.223147	0.80548	0.0136086	NA	NA	NA	NA
hsa-miR-140-3p	ACVR2B	0.185765	0.420121	0.958292	0.798923	0.80548	0.0136086	NA	NA	HITS-CLIP	PAR-CLIP
hsa-miR-140-3p	CHRDL1	0.152173	0.51022	1.49435	0.292121	0.80548	0.0136086	NA	NA	NA	HITS-CLIP
hsa-miR-140-3p	SMAD4	0.113671	0.623705	1.08483	0.392856	0.80548	0.0136086	NA	NA	NA	NA
hsa-miR-140-3p	SIRT1	0.10495	0.650731	0.945232	0.703658	0.80548	0.0136086	NA	NA	NA	NA
hsa-miR-140-3p	SMAD2	0.0619591	0.789621	1.18533	0.0540127	0.80548	0.0136086	NA	NA	NA	NA
hsa-miR-140-3p	CEBPB	-0.08455	0.71557	0.939753	0.736829	0.80548	0.0136086	NA	NA	NA	NA
hsa-miR-140-3p	GAS5	-0.0914688	0.693342	1.0647	0.746685	0.80548	0.0136086	NA	NA	NA	NA
hsa-miR-140-3p	ADAMTS5	-0.162838	0.480653	1.36417	0.016705	0.80548	0.0136086	NA	NA	NA	NA
hsa-miR-140-3p	MMP13	-0.175077	0.447812	0.895583	0.834042	0.80548	0.0136086	NA	NA	NA	NA
hsa-miR-140-3p	INPP5D	-0.232777	0.309899	0.933643	0.71454	0.80548	0.0136086	NA	NA	NA	NA
hsa-miR-140-3p	IL1B	-0.251652	0.271145	0.864069	0.884336	0.80548	0.0136086	NA	NA	NA	NA
hsa-miR-140-3p	TGFB1	-0.276168	0.225586	0.887273	0.585925	0.80548	0.0136086	NA	NA	NA	NA
hsa-miR-140-5p	SOX9	0.449157	0.0410945	0.862275	0.223147	1.39022	0.0448813	NA	NA	NA	Luciferase reporter assay//Western blot
hsa-miR-140-5p	BCL2	0.395522	0.0759459	1.1389	0.259904	1.39022	0.0448813	NA	NA	NA	NA
hsa-miR-140-5p	GDF5	0.358754	0.110256	1.23117	0.309402	1.39022	0.0448813	NA	NA	NA	NA
hsa-miR-140-5p	VEGFA	0.320861	0.156145	1.17721	0.27403	1.39022	0.0448813	-0.39	NA	Luciferase Reporter Assay	ELISA//Luciferase reporter assay
hsa-miR-140-5p	SIRT1	0.183096	0.426948	0.945232	0.703658	1.39022	0.0448813	NA	NA	NA	NA
hsa-miR-140-5p	COL2A1	0.176832	0.443201	1.00858	0.986423	1.39022	0.0448813	NA	NA	NA	NA
hsa-miR-140-5p	TGFB1	0.160186	0.487924	0.887273	0.585925	1.39022	0.0448813	NA	NA	HITS-CLIP	NA
hsa-miR-140-5p	GAS5	0.031245	0.893049	1.0647	0.746685	1.39022	0.0448813	NA	NA	NA	NA
hsa-miR-140-5p	CEBPB	-0.0743161	0.748856	0.939753	0.736829	1.39022	0.0448813	NA	NA	NA	NA
hsa-miR-140-5p	MMP13	-0.129951	0.5745	0.895583	0.834042	1.39022	0.0448813	NA	NA	NA	Microarray
hsa-miR-140-5p	ACVR2B	-0.15327	0.507138	0.958292	0.798923	1.39022	0.0448813	NA	NA	NA	NA
hsa-miR-140-5p	SMAD4	-0.156306	0.498658	1.08483	0.392856	1.39022	0.0448813	NA	NA	NA	NA
hsa-miR-140-5p	IGFBP5	-0.190931	0.407078	1.29452	0.177581	1.39022	0.0448813	-0.473	NA	NA	qRT-PCR
hsa-miR-140-5p	CHRDL1	-0.241107	0.2924	1.49435	0.292121	1.39022	0.0448813	NA	NA	NA	NA
hsa-miR-140-5p	ADAMTS5	-0.314578	0.164875	1.36417	0.016705	1.39022	0.0448813	-0.305	NA	NA	NA
hsa-miR-140-5p	SMAD2	-0.333425	0.139667	1.18533	0.0540127	1.39022	0.0448813	-0.129	NA	NA	NA
hsa-miR-140-5p	INPP5D	-0.408411	0.0660515	0.933643	0.71454	1.39022	0.0448813	NA	NA	NA	NA
hsa-miR-140-5p	IL1B	-0.474368	0.0298046	0.864069	0.884336	1.39022	0.0448813	NA	NA	NA	NA
hsa-miR-142-5p	GAS5	0.383776	0.0858925	1.0647	0.746685	3.26972	4.55132e-05	NA	NA	NA	NA
hsa-miR-142-5p	IL1B	0.231939	0.311693	0.864069	0.884336	3.26972	4.55132e-05	NA	NA	NA	NA
hsa-miR-142-5p	INPP5D	0.142844	0.536778	0.933643	0.71454	3.26972	4.55132e-05	NA	NA	NA	NA
hsa-miR-142-5p	CEBPB	0.120262	0.603583	0.939753	0.736829	3.26972	4.55132e-05	NA	NA	NA	NA
hsa-miR-142-5p	CHRDL1	0.0933538	0.687326	1.49435	0.292121	3.26972	4.55132e-05	NA	NA	NA	NA
hsa-miR-142-5p	MMP13	-0.0258652	0.911387	0.895583	0.834042	3.26972	4.55132e-05	NA	NA	NA	NA
hsa-miR-142-5p	SOX9	-0.12483	0.589796	0.862275	0.223147	3.26972	4.55132e-05	NA	NA	NA	NA
hsa-miR-142-5p	TGFB1	-0.128275	0.579486	0.887273	0.585925	3.26972	4.55132e-05	NA	NA	NA	NA
hsa-miR-142-5p	ADAMTS5	-0.137259	0.552977	1.36417	0.016705	3.26972	4.55132e-05	-0.03	NA	NA	NA
hsa-miR-142-5p	ACVR2B	-0.156277	0.498739	0.958292	0.798923	3.26972	4.55132e-05	NA	NA	NA	NA
hsa-miR-142-5p	BCL2	-0.161868	0.483305	1.1389	0.259904	3.26972	4.55132e-05	NA	NA	NA	NA
hsa-miR-142-5p	SIRT1	-0.191162	0.406499	0.945232	0.703658	3.26972	4.55132e-05	NA	NA	NA	Immunofluorescence//In situ hybridization//Luciferase reporter assay//qRT-PCR//Western blot
hsa-miR-142-5p	SMAD4	-0.20594	0.370466	1.08483	0.392856	3.26972	4.55132e-05	NA	NA	NA	NA
hsa-miR-142-5p	COL2A1	-0.281499	0.216389	1.00858	0.986423	3.26972	4.55132e-05	NA	NA	NA	NA
hsa-miR-142-5p	IGFBP5	-0.296557	0.191764	1.29452	0.177581	3.26972	4.55132e-05	NA	NA	NA	NA
hsa-miR-142-5p	VEGFA	-0.354934	0.114376	1.17721	0.27403	3.26972	4.55132e-05	NA	NA	NA	NA
hsa-miR-142-5p	GDF5	-0.428176	0.0528137	1.23117	0.309402	3.26972	4.55132e-05	NA	NA	NA	NA
hsa-miR-142-5p	SMAD2	-0.458812	0.0364335	1.18533	0.0540127	3.26972	4.55132e-05	-0.01	NA	NA	NA
hsa-miR-143-3p	IL1B	0.610475	0.00329101	0.864069	0.884336	2.09923	0.000112617	NA	NA	NA	NA
hsa-miR-143-3p	INPP5D	0.575696	0.00631656	0.933643	0.71454	2.09923	0.000112617	NA	NA	NA	NA
hsa-miR-143-3p	MMP13	0.552963	0.00932467	0.895583	0.834042	2.09923	0.000112617	NA	NA	NA	Western blot;Microarray
hsa-miR-143-3p	ADAMTS5	0.414702	0.0615921	1.36417	0.016705	2.09923	0.000112617	NA	NA	NA	NA
hsa-miR-143-3p	CEBPB	0.288186	0.205208	0.939753	0.736829	2.09923	0.000112617	NA	NA	NA	NA
hsa-miR-143-3p	CHRDL1	0.207533	0.366692	1.49435	0.292121	2.09923	0.000112617	NA	NA	NA	NA
hsa-miR-143-3p	GAS5	0.159659	0.489374	1.0647	0.746685	2.09923	0.000112617	NA	NA	NA	NA
hsa-miR-143-3p	SMAD2	-0.0579705	0.802899	1.18533	0.0540127	2.09923	0.000112617	NA	NA	NA	NA
hsa-miR-143-3p	TGFB1	-0.170586	0.459725	0.887273	0.585925	2.09923	0.000112617	NA	NA	NA	NA
hsa-miR-143-3p	ACVR2B	-0.19119	0.40643	0.958292	0.798923	2.09923	0.000112617	NA	NA	NA	NA
hsa-miR-143-3p	COL2A1	-0.264666	0.24629	1.00858	0.986423	2.09923	0.000112617	NA	NA	NA	NA
hsa-miR-143-3p	SMAD4	-0.266727	0.242493	1.08483	0.392856	2.09923	0.000112617	NA	NA	NA	NA
hsa-miR-143-3p	GDF5	-0.281674	0.216091	1.23117	0.309402	2.09923	0.000112617	NA	NA	NA	NA
hsa-miR-143-3p	IGFBP5	-0.295594	0.193279	1.29452	0.177581	2.09923	0.000112617	-0.444	NA	HITS-CLIP	PAR-CLIP
hsa-miR-143-3p	VEGFA	-0.338744	0.133074	1.17721	0.27403	2.09923	0.000112617	NA	NA	NA	NA
hsa-miR-143-3p	SIRT1	-0.44573	0.0428559	0.945232	0.703658	2.09923	0.000112617	NA	NA	NA	NA
hsa-miR-143-3p	SOX9	-0.596053	0.00435075	0.862275	0.223147	2.09923	0.000112617	NA	NA	NA	NA
hsa-miR-143-3p	BCL2	-0.736961	0.000138534	1.1389	0.259904	2.09923	0.000112617	-0.133	NA	qPCR	Western blot
hsa-miR-144-3p	CHRDL1	0.255163	0.26429	1.49435	0.292121	4.07217	1.21891e-06	NA	NA	NA	NA
hsa-miR-144-3p	GAS5	0.250248	0.273917	1.0647	0.746685	4.07217	1.21891e-06	NA	NA	NA	NA
hsa-miR-144-3p	CEBPB	0.231177	0.313331	0.939753	0.736829	4.07217	1.21891e-06	NA	NA	NA	NA
hsa-miR-144-3p	INPP5D	0.207181	0.367525	0.933643	0.71454	4.07217	1.21891e-06	NA	NA	NA	NA
hsa-miR-144-3p	ADAMTS5	0.0987737	0.670133	1.36417	0.016705	4.07217	1.21891e-06	-0.066	NA	NA	NA
hsa-miR-144-3p	MMP13	0.0867384	0.708515	0.895583	0.834042	4.07217	1.21891e-06	NA	NA	NA	NA
hsa-miR-144-3p	TGFB1	0.0614061	0.791459	0.887273	0.585925	4.07217	1.21891e-06	NA	NA	NA	Luciferase reporter assay//qRT-PCR
hsa-miR-144-3p	SOX9	0.0073635	0.974729	0.862275	0.223147	4.07217	1.21891e-06	NA	NA	NA	NA
hsa-miR-144-3p	IL1B	0.00643926	0.9779	0.864069	0.884336	4.07217	1.21891e-06	NA	NA	NA	NA
hsa-miR-144-3p	SMAD4	-0.0259536	0.911085	1.08483	0.392856	4.07217	1.21891e-06	NA	NA	NA	NA
hsa-miR-144-3p	SIRT1	-0.0541822	0.815559	0.945232	0.703658	4.07217	1.21891e-06	NA	NA	NA	NA
hsa-miR-144-3p	COL2A1	-0.0855307	0.712406	1.00858	0.986423	4.07217	1.21891e-06	NA	NA	NA	NA
hsa-miR-144-3p	ACVR2B	-0.103547	0.655121	0.958292	0.798923	4.07217	1.21891e-06	-0.01	NA	NA	NA
hsa-miR-144-3p	BCL2	-0.111655	0.629915	1.1389	0.259904	4.07217	1.21891e-06	NA	NA	NA	NA
hsa-miR-144-3p	VEGFA	-0.168486	0.465349	1.17721	0.27403	4.07217	1.21891e-06	NA	NA	NA	NA
hsa-miR-144-3p	IGFBP5	-0.195977	0.394554	1.29452	0.177581	4.07217	1.21891e-06	NA	NA	NA	NA
hsa-miR-144-3p	GDF5	-0.270295	0.236011	1.23117	0.309402	4.07217	1.21891e-06	NA	NA	NA	NA
hsa-miR-144-3p	SMAD2	-0.408789	0.0657772	1.18533	0.0540127	4.07217	1.21891e-06	NA	NA	NA	NA
hsa-miR-144-5p	CHRDL1	0.28902	0.203841	1.49435	0.292121	3.76132	0.000468	NA	NA	NA	NA
hsa-miR-144-5p	GAS5	0.244452	0.285551	1.0647	0.746685	3.76132	0.000468	NA	NA	NA	NA
hsa-miR-144-5p	INPP5D	0.201546	0.380983	0.933643	0.71454	3.76132	0.000468	NA	NA	NA	NA
hsa-miR-144-5p	SMAD4	0.131449	0.57006	1.08483	0.392856	3.76132	0.000468	NA	NA	NA	NA
hsa-miR-144-5p	TGFB1	0.0993656	0.668265	0.887273	0.585925	3.76132	0.000468	NA	NA	NA	NA
hsa-miR-144-5p	ACVR2B	0.0913378	0.69376	0.958292	0.798923	3.76132	0.000468	NA	NA	NA	NA
hsa-miR-144-5p	CEBPB	0.0863555	0.709747	0.939753	0.736829	3.76132	0.000468	NA	NA	NA	NA
hsa-miR-144-5p	SIRT1	0.0503958	0.828256	0.945232	0.703658	3.76132	0.000468	NA	NA	NA	NA
hsa-miR-144-5p	ADAMTS5	0.0391173	0.866312	1.36417	0.016705	3.76132	0.000468	NA	NA	NA	NA
hsa-miR-144-5p	IGFBP5	0.0125493	0.956944	1.29452	0.177581	3.76132	0.000468	NA	NA	NA	NA
hsa-miR-144-5p	IL1B	0.00286528	0.990165	0.864069	0.884336	3.76132	0.000468	NA	NA	NA	NA
hsa-miR-144-5p	SOX9	-0.0212811	0.927047	0.862275	0.223147	3.76132	0.000468	NA	NA	NA	NA
hsa-miR-144-5p	BCL2	-0.0511414	0.825753	1.1389	0.259904	3.76132	0.000468	NA	NA	NA	NA
hsa-miR-144-5p	MMP13	-0.0633884	0.784877	0.895583	0.834042	3.76132	0.000468	NA	NA	NA	NA
hsa-miR-144-5p	VEGFA	-0.155877	0.499853	1.17721	0.27403	3.76132	0.000468	NA	NA	NA	NA
hsa-miR-144-5p	COL2A1	-0.16777	0.467277	1.00858	0.986423	3.76132	0.000468	NA	NA	NA	NA
hsa-miR-144-5p	SMAD2	-0.279676	0.219506	1.18533	0.0540127	3.76132	0.000468	NA	NA	NA	NA
hsa-miR-144-5p	GDF5	-0.424689	0.0549874	1.23117	0.309402	3.76132	0.000468	NA	NA	NA	NA
hsa-miR-145-3p	INPP5D	0.547861	0.0101396	0.933643	0.71454	1.73804	0.018738	NA	NA	NA	NA
hsa-miR-145-3p	CHRDL1	0.3512	0.118509	1.49435	0.292121	1.73804	0.018738	NA	NA	NA	NA
hsa-miR-145-3p	MMP13	0.220936	0.335836	0.895583	0.834042	1.73804	0.018738	NA	NA	NA	NA
hsa-miR-145-3p	IL1B	0.195692	0.395256	0.864069	0.884336	1.73804	0.018738	NA	NA	NA	NA
hsa-miR-145-3p	SMAD2	0.0844458	0.715907	1.18533	0.0540127	1.73804	0.018738	NA	NA	NA	NA
hsa-miR-145-3p	ADAMTS5	0.00423792	0.985454	1.36417	0.016705	1.73804	0.018738	NA	NA	NA	NA
hsa-miR-145-3p	GAS5	0.000385284	0.998678	1.0647	0.746685	1.73804	0.018738	NA	NA	NA	NA
hsa-miR-145-3p	SOX9	-0.000228478	0.999216	0.862275	0.223147	1.73804	0.018738	NA	NA	NA	NA
hsa-miR-145-3p	ACVR2B	-0.00770366	0.973562	0.958292	0.798923	1.73804	0.018738	NA	NA	NA	NA
hsa-miR-145-3p	COL2A1	-0.0285865	0.902105	1.00858	0.986423	1.73804	0.018738	NA	NA	NA	NA
hsa-miR-145-3p	CEBPB	-0.0383331	0.868969	0.939753	0.736829	1.73804	0.018738	NA	NA	NA	NA
hsa-miR-145-3p	SIRT1	-0.0637842	0.783564	0.945232	0.703658	1.73804	0.018738	NA	NA	NA	NA
hsa-miR-145-3p	SMAD4	-0.0924849	0.690097	1.08483	0.392856	1.73804	0.018738	NA	NA	NA	NA
hsa-miR-145-3p	IGFBP5	-0.113164	0.625266	1.29452	0.177581	1.73804	0.018738	NA	NA	NA	NA
hsa-miR-145-3p	BCL2	-0.231346	0.312966	1.1389	0.259904	1.73804	0.018738	NA	NA	NA	NA
hsa-miR-145-3p	VEGFA	-0.28748	0.206371	1.17721	0.27403	1.73804	0.018738	NA	NA	NA	NA
hsa-miR-145-3p	TGFB1	-0.299599	0.18703	0.887273	0.585925	1.73804	0.018738	NA	NA	NA	NA
hsa-miR-145-3p	GDF5	-0.418814	0.0588036	1.23117	0.309402	1.73804	0.018738	NA	NA	NA	NA
hsa-miR-146a-5p	IL1B	0.564427	0.00768775	0.864069	0.884336	1.59804	0.0159314	NA	NA	NA	NA
hsa-miR-146a-5p	INPP5D	0.493195	0.023096	0.933643	0.71454	1.59804	0.0159314	NA	NA	NA	NA
hsa-miR-146a-5p	CHRDL1	0.350528	0.119265	1.49435	0.292121	1.59804	0.0159314	NA	NA	NA	NA
hsa-miR-146a-5p	MMP13	0.2912	0.200298	0.895583	0.834042	1.59804	0.0159314	NA	NA	NA	NA
hsa-miR-146a-5p	GAS5	0.219145	0.339867	1.0647	0.746685	1.59804	0.0159314	NA	NA	NA	NA
hsa-miR-146a-5p	CEBPB	0.174184	0.450167	0.939753	0.736829	1.59804	0.0159314	NA	NA	NA	NA
hsa-miR-146a-5p	ACVR2B	0.134277	0.561716	0.958292	0.798923	1.59804	0.0159314	NA	NA	NA	NA
hsa-miR-146a-5p	ADAMTS5	0.0931088	0.688107	1.36417	0.016705	1.59804	0.0159314	NA	NA	NA	NA
hsa-miR-146a-5p	SMAD4	-0.00653888	0.977558	1.08483	0.392856	1.59804	0.0159314	-0.229	NA	qPCR	Luciferase reporter assay//qRT-PCR//Western blot
hsa-miR-146a-5p	IGFBP5	-0.0179096	0.938582	1.29452	0.177581	1.59804	0.0159314	NA	NA	NA	NA
hsa-miR-146a-5p	COL2A1	-0.197103	0.39179	1.00858	0.986423	1.59804	0.0159314	NA	NA	NA	NA
hsa-miR-146a-5p	GDF5	-0.248506	0.277381	1.23117	0.309402	1.59804	0.0159314	NA	NA	NA	NA
hsa-miR-146a-5p	SMAD2	-0.266965	0.242058	1.18533	0.0540127	1.59804	0.0159314	NA	NA	NA	qRT-PCR//Western blot
hsa-miR-146a-5p	VEGFA	-0.358213	0.110834	1.17721	0.27403	1.59804	0.0159314	NA	NA	qPCR	NA
hsa-miR-146a-5p	BCL2	-0.387173	0.082922	1.1389	0.259904	1.59804	0.0159314	NA	NA	NA	NA
hsa-miR-146a-5p	SIRT1	-0.392084	0.0787635	0.945232	0.703658	1.59804	0.0159314	NA	NA	NA	NA
hsa-miR-146a-5p	TGFB1	-0.393306	0.0777526	0.887273	0.585925	1.59804	0.0159314	NA	NA	NA	NA
hsa-miR-146a-5p	SOX9	-0.416003	0.060699	0.862275	0.223147	1.59804	0.0159314	NA	NA	NA	NA
hsa-miR-146b-3p	ACVR2B	0.540084	0.0114931	0.958292	0.798923	0.472861	1.21891e-06	NA	NA	NA	NA
hsa-miR-146b-3p	INPP5D	0.479283	0.0279211	0.933643	0.71454	0.472861	1.21891e-06	NA	NA	NA	NA
hsa-miR-146b-3p	CHRDL1	0.382369	0.0871462	1.49435	0.292121	0.472861	1.21891e-06	NA	NA	NA	NA
hsa-miR-146b-3p	SMAD4	0.380357	0.0889618	1.08483	0.392856	0.472861	1.21891e-06	NA	NA	NA	NA
hsa-miR-146b-3p	IGFBP5	0.364471	0.104294	1.29452	0.177581	0.472861	1.21891e-06	NA	NA	NA	NA
hsa-miR-146b-3p	IL1B	0.282788	0.214203	0.864069	0.884336	0.472861	1.21891e-06	NA	NA	NA	NA
hsa-miR-146b-3p	MMP13	0.231605	0.31241	0.895583	0.834042	0.472861	1.21891e-06	NA	NA	NA	NA
hsa-miR-146b-3p	ADAMTS5	0.12156	0.599653	1.36417	0.016705	0.472861	1.21891e-06	NA	NA	HITS-CLIP	NA
hsa-miR-146b-3p	CEBPB	0.0876401	0.705614	0.939753	0.736829	0.472861	1.21891e-06	NA	NA	NA	NA
hsa-miR-146b-3p	GAS5	0.00433905	0.985107	1.0647	0.746685	0.472861	1.21891e-06	NA	NA	NA	NA
hsa-miR-146b-3p	SIRT1	0.00127587	0.995621	0.945232	0.703658	0.472861	1.21891e-06	NA	NA	NA	NA
hsa-miR-146b-3p	COL2A1	-0.0641967	0.782197	1.00858	0.986423	0.472861	1.21891e-06	NA	NA	NA	NA
hsa-miR-146b-3p	SMAD2	-0.0811287	0.726646	1.18533	0.0540127	0.472861	1.21891e-06	NA	NA	NA	NA
hsa-miR-146b-3p	SOX9	-0.0847283	0.714995	0.862275	0.223147	0.472861	1.21891e-06	NA	NA	NA	NA
hsa-miR-146b-3p	GDF5	-0.0940826	0.685005	1.23117	0.309402	0.472861	1.21891e-06	NA	NA	NA	NA
hsa-miR-146b-3p	VEGFA	-0.145802	0.528288	1.17721	0.27403	0.472861	1.21891e-06	NA	NA	NA	NA
hsa-miR-146b-3p	BCL2	-0.21121	0.358071	1.1389	0.259904	0.472861	1.21891e-06	NA	NA	NA	NA
hsa-miR-146b-3p	TGFB1	-0.326902	0.148061	0.887273	0.585925	0.472861	1.21891e-06	NA	NA	NA	NA
hsa-miR-148a-5p	COL2A1	0.355841	0.113388	1.00858	0.986423	0.633742	0.00155755	NA	NA	NA	NA
hsa-miR-148a-5p	SMAD2	0.28596	0.208887	1.18533	0.0540127	0.633742	0.00155755	NA	NA	HITS-CLIP	NA
hsa-miR-148a-5p	IGFBP5	0.285602	0.209481	1.29452	0.177581	0.633742	0.00155755	NA	NA	NA	NA
hsa-miR-148a-5p	CHRDL1	0.274563	0.228404	1.49435	0.292121	0.633742	0.00155755	NA	NA	NA	NA
hsa-miR-148a-5p	SMAD4	0.218842	0.340553	1.08483	0.392856	0.633742	0.00155755	NA	NA	NA	NA
hsa-miR-148a-5p	BCL2	0.130241	0.57364	1.1389	0.259904	0.633742	0.00155755	NA	NA	NA	NA
hsa-miR-148a-5p	INPP5D	0.0661096	0.775864	0.933643	0.71454	0.633742	0.00155755	NA	NA	NA	NA
hsa-miR-148a-5p	GDF5	0.0324327	0.889007	1.23117	0.309402	0.633742	0.00155755	NA	NA	NA	NA
hsa-miR-148a-5p	ADAMTS5	0.0227425	0.922052	1.36417	0.016705	0.633742	0.00155755	NA	NA	HITS-CLIP	NA
hsa-miR-148a-5p	ACVR2B	0.0158114	0.945767	0.958292	0.798923	0.633742	0.00155755	NA	NA	NA	NA
hsa-miR-148a-5p	VEGFA	0.0127575	0.956231	1.17721	0.27403	0.633742	0.00155755	NA	NA	NA	NA
hsa-miR-148a-5p	SIRT1	0.00786133	0.973021	0.945232	0.703658	0.633742	0.00155755	NA	NA	PAR-CLIP	NA
hsa-miR-148a-5p	SOX9	-0.0318954	0.890835	0.862275	0.223147	0.633742	0.00155755	NA	NA	PAR-CLIP	NA
hsa-miR-148a-5p	GAS5	-0.049589	0.830967	1.0647	0.746685	0.633742	0.00155755	NA	NA	NA	NA
hsa-miR-148a-5p	CEBPB	-0.0745948	0.747943	0.939753	0.736829	0.633742	0.00155755	NA	NA	NA	NA
hsa-miR-148a-5p	IL1B	-0.0815437	0.7253	0.864069	0.884336	0.633742	0.00155755	NA	NA	NA	NA
hsa-miR-148a-5p	MMP13	-0.169163	0.463532	0.895583	0.834042	0.633742	0.00155755	NA	NA	NA	NA
hsa-miR-148a-5p	TGFB1	-0.305108	0.178658	0.887273	0.585925	0.633742	0.00155755	NA	NA	NA	NA
hsa-miR-148b-5p	ACVR2B	0.2775	0.223264	0.958292	0.798923	1.50126	0.0136086	NA	NA	HITS-CLIP	NA
hsa-miR-148b-5p	INPP5D	0.253479	0.267564	0.933643	0.71454	1.50126	0.0136086	NA	NA	NA	NA
hsa-miR-148b-5p	SMAD4	0.246333	0.281743	1.08483	0.392856	1.50126	0.0136086	NA	NA	NA	NA
hsa-miR-148b-5p	SOX9	0.126222	0.585622	0.862275	0.223147	1.50126	0.0136086	NA	NA	NA	NA
hsa-miR-148b-5p	GAS5	0.085152	0.713627	1.0647	0.746685	1.50126	0.0136086	NA	NA	NA	NA
hsa-miR-148b-5p	CHRDL1	0.0663477	0.775077	1.49435	0.292121	1.50126	0.0136086	NA	NA	NA	NA
hsa-miR-148b-5p	SIRT1	0.0524937	0.821216	0.945232	0.703658	1.50126	0.0136086	NA	NA	NA	NA
hsa-miR-148b-5p	BCL2	0.0395999	0.864677	1.1389	0.259904	1.50126	0.0136086	NA	NA	NA	NA
hsa-miR-148b-5p	IL1B	-0.0163165	0.944037	0.864069	0.884336	1.50126	0.0136086	NA	NA	NA	NA
hsa-miR-148b-5p	IGFBP5	-0.0198998	0.931772	1.29452	0.177581	1.50126	0.0136086	NA	NA	NA	NA
hsa-miR-148b-5p	CEBPB	-0.0347605	0.881093	0.939753	0.736829	1.50126	0.0136086	NA	NA	NA	NA
hsa-miR-148b-5p	TGFB1	-0.0918818	0.692022	0.887273	0.585925	1.50126	0.0136086	NA	NA	NA	NA
hsa-miR-148b-5p	MMP13	-0.145378	0.529503	0.895583	0.834042	1.50126	0.0136086	NA	NA	NA	NA
hsa-miR-148b-5p	COL2A1	-0.191227	0.406338	1.00858	0.986423	1.50126	0.0136086	NA	NA	NA	NA
hsa-miR-148b-5p	ADAMTS5	-0.213661	0.35239	1.36417	0.016705	1.50126	0.0136086	NA	NA	NA	NA
hsa-miR-148b-5p	SMAD2	-0.229882	0.316124	1.18533	0.0540127	1.50126	0.0136086	NA	NA	HITS-CLIP	NA
hsa-miR-148b-5p	VEGFA	-0.377327	0.0917493	1.17721	0.27403	1.50126	0.0136086	NA	NA	NA	NA
hsa-miR-148b-5p	GDF5	-0.402195	0.0706937	1.23117	0.309402	1.50126	0.0136086	NA	NA	NA	NA
hsa-miR-149-5p	IGFBP5	0.448055	0.0416546	1.29452	0.177581	0.577895	0.000521709	-0.185	NA	HITS-CLIP	NA
hsa-miR-149-5p	ACVR2B	0.418599	0.0589471	0.958292	0.798923	0.577895	0.000521709	NA	NA	NA	NA
hsa-miR-149-5p	SMAD4	0.417215	0.0598765	1.08483	0.392856	0.577895	0.000521709	NA	NA	NA	NA
hsa-miR-149-5p	CHRDL1	0.345189	0.125388	1.49435	0.292121	0.577895	0.000521709	NA	NA	NA	NA
hsa-miR-149-5p	SMAD2	0.323567	0.152487	1.18533	0.0540127	0.577895	0.000521709	-0.01	NA	HITS-CLIP	NA
hsa-miR-149-5p	BCL2	0.234283	0.306688	1.1389	0.259904	0.577895	0.000521709	NA	NA	NA	NA
hsa-miR-149-5p	INPP5D	0.220566	0.336667	0.933643	0.71454	0.577895	0.000521709	NA	NA	NA	NA
hsa-miR-149-5p	SIRT1	0.159482	0.489864	0.945232	0.703658	0.577895	0.000521709	NA	NA	NA	NA
hsa-miR-149-5p	COL2A1	0.154285	0.504296	1.00858	0.986423	0.577895	0.000521709	NA	NA	NA	NA
hsa-miR-149-5p	SOX9	0.136013	0.556623	0.862275	0.223147	0.577895	0.000521709	NA	NA	NA	NA
hsa-miR-149-5p	IL1B	0.0241218	0.917339	0.864069	0.884336	0.577895	0.000521709	NA	NA	NA	NA
hsa-miR-149-5p	VEGFA	-0.131118	0.571039	1.17721	0.27403	0.577895	0.000521709	NA	NA	NA	NA
hsa-miR-149-5p	GAS5	-0.171591	0.457045	1.0647	0.746685	0.577895	0.000521709	NA	NA	NA	NA
hsa-miR-149-5p	TGFB1	-0.17911	0.437254	0.887273	0.585925	0.577895	0.000521709	NA	NA	NA	NA
hsa-miR-149-5p	ADAMTS5	-0.21416	0.35124	1.36417	0.016705	0.577895	0.000521709	NA	NA	NA	NA
hsa-miR-149-5p	MMP13	-0.216101	0.346784	0.895583	0.834042	0.577895	0.000521709	NA	NA	NA	NA
hsa-miR-149-5p	CEBPB	-0.222608	0.332098	0.939753	0.736829	0.577895	0.000521709	NA	NA	NA	NA
hsa-miR-149-5p	GDF5	-0.225936	0.324731	1.23117	0.309402	0.577895	0.000521709	NA	NA	NA	NA
hsa-miR-151a-3p	GAS5	0.266941	0.242101	1.0647	0.746685	1.39588	0.00648611	NA	NA	NA	NA
hsa-miR-151a-3p	IL1B	0.14796	0.522135	0.864069	0.884336	1.39588	0.00648611	NA	NA	NA	NA
hsa-miR-151a-3p	MMP13	0.133496	0.564016	0.895583	0.834042	1.39588	0.00648611	NA	NA	NA	NA
hsa-miR-151a-3p	GDF5	0.0802218	0.729591	1.23117	0.309402	1.39588	0.00648611	NA	NA	NA	NA
hsa-miR-151a-3p	ADAMTS5	0.00149193	0.994879	1.36417	0.016705	1.39588	0.00648611	NA	NA	NA	NA
hsa-miR-151a-3p	VEGFA	-0.00616751	0.978833	1.17721	0.27403	1.39588	0.00648611	NA	NA	NA	NA
hsa-miR-151a-3p	TGFB1	-0.0919397	0.691837	0.887273	0.585925	1.39588	0.00648611	NA	NA	NA	NA
hsa-miR-151a-3p	CEBPB	-0.0924852	0.690096	0.939753	0.736829	1.39588	0.00648611	NA	NA	NA	NA
hsa-miR-151a-3p	BCL2	-0.130521	0.572808	1.1389	0.259904	1.39588	0.00648611	NA	NA	NA	NA
hsa-miR-151a-3p	INPP5D	-0.134101	0.562234	0.933643	0.71454	1.39588	0.00648611	NA	NA	NA	NA
hsa-miR-151a-3p	SIRT1	-0.167636	0.467638	0.945232	0.703658	1.39588	0.00648611	NA	NA	NA	NA
hsa-miR-151a-3p	SOX9	-0.193008	0.401897	0.862275	0.223147	1.39588	0.00648611	NA	NA	PAR-CLIP	NA
hsa-miR-151a-3p	CHRDL1	-0.194984	0.397001	1.49435	0.292121	1.39588	0.00648611	NA	NA	NA	NA
hsa-miR-151a-3p	SMAD2	-0.240225	0.294223	1.18533	0.0540127	1.39588	0.00648611	NA	NA	NA	NA
hsa-miR-151a-3p	COL2A1	-0.259948	0.255125	1.00858	0.986423	1.39588	0.00648611	NA	NA	NA	NA
hsa-miR-151a-3p	IGFBP5	-0.306567	0.176485	1.29452	0.177581	1.39588	0.00648611	NA	NA	HITS-CLIP	NA
hsa-miR-151a-3p	ACVR2B	-0.311611	0.169112	0.958292	0.798923	1.39588	0.00648611	NA	NA	NA	NA
hsa-miR-151a-3p	SMAD4	-0.424277	0.0552486	1.08483	0.392856	1.39588	0.00648611	NA	NA	HITS-CLIP	NA
hsa-miR-152-3p	GDF5	0.403319	0.0698361	1.23117	0.309402	1.27165	0.0173433	NA	NA	NA	NA
hsa-miR-152-3p	CEBPB	0.398099	0.0738842	0.939753	0.736829	1.27165	0.0173433	NA	NA	NA	NA
hsa-miR-152-3p	GAS5	0.379217	0.0900035	1.0647	0.746685	1.27165	0.0173433	NA	NA	NA	NA
hsa-miR-152-3p	COL2A1	0.151483	0.512162	1.00858	0.986423	1.27165	0.0173433	-0.385	NA	NA	NA
hsa-miR-152-3p	IL1B	0.131713	0.569279	0.864069	0.884336	1.27165	0.0173433	NA	NA	NA	NA
hsa-miR-152-3p	MMP13	0.119928	0.604596	0.895583	0.834042	1.27165	0.0173433	NA	NA	NA	NA
hsa-miR-152-3p	VEGFA	0.0396107	0.86464	1.17721	0.27403	1.27165	0.0173433	NA	NA	HITS-CLIP	NA
hsa-miR-152-3p	TGFB1	0.0342733	0.882749	0.887273	0.585925	1.27165	0.0173433	NA	NA	NA	NA
hsa-miR-152-3p	ADAMTS5	-0.067165	0.772376	1.36417	0.016705	1.27165	0.0173433	-0.113	NA	HITS-CLIP	NA
hsa-miR-152-3p	CHRDL1	-0.0693216	0.765262	1.49435	0.292121	1.27165	0.0173433	NA	NA	NA	NA
hsa-miR-152-3p	BCL2	-0.17712	0.442446	1.1389	0.259904	1.27165	0.0173433	NA	NA	NA	NA
hsa-miR-152-3p	INPP5D	-0.239584	0.295553	0.933643	0.71454	1.27165	0.0173433	NA	NA	NA	NA
hsa-miR-152-3p	SMAD2	-0.247066	0.280266	1.18533	0.0540127	1.27165	0.0173433	-0.112	NA	NA	NA
hsa-miR-152-3p	IGFBP5	-0.332892	0.140339	1.29452	0.177581	1.27165	0.0173433	NA	NA	NA	PAR-CLIP
hsa-miR-152-3p	SMAD4	-0.370269	0.0984904	1.08483	0.392856	1.27165	0.0173433	NA	NA	NA	NA
hsa-miR-152-3p	SOX9	-0.424693	0.0549847	0.862275	0.223147	1.27165	0.0173433	NA	NA	NA	NA
hsa-miR-152-3p	ACVR2B	-0.50299	0.0201165	0.958292	0.798923	1.27165	0.0173433	-0.077	NA	HITS-CLIP	NA
hsa-miR-152-3p	SIRT1	-0.545549	0.0105277	0.945232	0.703658	1.27165	0.0173433	NA	NA	NA	NA
hsa-miR-155-5p	GAS5	0.369995	0.0987592	1.0647	0.746685	1.81943	0.00549097	NA	NA	NA	NA
hsa-miR-155-5p	INPP5D	0.286309	0.208306	0.933643	0.71454	1.81943	0.00549097	-0.102	NA	NA	GFP reporter assay//Luciferase reporter assay//Northern blot//qRT-PCR//Western blot
hsa-miR-155-5p	IL1B	0.282885	0.214039	0.864069	0.884336	1.81943	0.00549097	NA	NA	ELISA	NA
hsa-miR-155-5p	CEBPB	0.271209	0.234368	0.939753	0.736829	1.81943	0.00549097	-0.558	NA	pSILAC	Microarray//qRT-PCR//Western blot
hsa-miR-155-5p	MMP13	0.203823	0.375512	0.895583	0.834042	1.81943	0.00549097	NA	NA	NA	NA
hsa-miR-155-5p	TGFB1	0.030929	0.894125	0.887273	0.585925	1.81943	0.00549097	NA	NA	NA	NA
hsa-miR-155-5p	ACVR2B	3.04965e-05	0.999895	0.958292	0.798923	1.81943	0.00549097	-0.03	NA	NA	NA
hsa-miR-155-5p	SOX9	-0.135926	0.556876	0.862275	0.223147	1.81943	0.00549097	NA	NA	PAR-CLIP	NA
hsa-miR-155-5p	SMAD4	-0.150286	0.515541	1.08483	0.392856	1.81943	0.00549097	NA	NA	Western Blot	Western blot
hsa-miR-155-5p	CHRDL1	-0.16435	0.476531	1.49435	0.292121	1.81943	0.00549097	NA	NA	NA	HITS-CLIP
hsa-miR-155-5p	ADAMTS5	-0.198343	0.388756	1.36417	0.016705	1.81943	0.00549097	NA	NA	NA	NA
hsa-miR-155-5p	SIRT1	-0.267552	0.240984	0.945232	0.703658	1.81943	0.00549097	-0.1	NA	NA	HITS-CLIP
hsa-miR-155-5p	GDF5	-0.313285	0.166712	1.23117	0.309402	1.81943	0.00549097	NA	NA	NA	NA
hsa-miR-155-5p	VEGFA	-0.325599	0.14978	1.17721	0.27403	1.81943	0.00549097	NA	NA	NA	NA
hsa-miR-155-5p	BCL2	-0.329628	0.14451	1.1389	0.259904	1.81943	0.00549097	NA	NA	HITS-CLIP	NA
hsa-miR-155-5p	IGFBP5	-0.358006	0.111055	1.29452	0.177581	1.81943	0.00549097	NA	NA	NA	NA
hsa-miR-155-5p	SMAD2	-0.426999	0.0535398	1.18533	0.0540127	1.81943	0.00549097	-0.286	NA	Western Blot	qRT-PCR//Western blot//Luciferase reporter assay
hsa-miR-155-5p	COL2A1	-0.427315	0.0533443	1.00858	0.986423	1.81943	0.00549097	NA	NA	NA	NA
hsa-miR-15a-5p	GAS5	0.368058	0.100675	1.0647	0.746685	2.15621	0.00105605	NA	NA	NA	NA
hsa-miR-15a-5p	INPP5D	0.293973	0.195849	0.933643	0.71454	2.15621	0.00105605	NA	NA	NA	NA
hsa-miR-15a-5p	IL1B	0.226262	0.324015	0.864069	0.884336	2.15621	0.00105605	NA	NA	NA	NA
hsa-miR-15a-5p	CHRDL1	0.143048	0.536191	1.49435	0.292121	2.15621	0.00105605	NA	NA	NA	NA
hsa-miR-15a-5p	CEBPB	0.136972	0.553817	0.939753	0.736829	2.15621	0.00105605	NA	NA	NA	NA
hsa-miR-15a-5p	ACVR2B	-0.0514349	0.824767	0.958292	0.798923	2.15621	0.00105605	-0.137	NA	HITS-CLIP	NA
hsa-miR-15a-5p	SMAD4	-0.0562417	0.808671	1.08483	0.392856	2.15621	0.00105605	NA	NA	NA	NA
hsa-miR-15a-5p	SOX9	-0.0833928	0.71931	0.862275	0.223147	2.15621	0.00105605	NA	NA	NA	NA
hsa-miR-15a-5p	BCL2	-0.106936	0.64454	1.1389	0.259904	2.15621	0.00105605	-0.27	NA	Western Blot	HITS-CLIP
hsa-miR-15a-5p	MMP13	-0.110675	0.632941	0.895583	0.834042	2.15621	0.00105605	NA	NA	NA	NA
hsa-miR-15a-5p	COL2A1	-0.193058	0.401772	1.00858	0.986423	2.15621	0.00105605	NA	NA	NA	NA
hsa-miR-15a-5p	SIRT1	-0.238214	0.298408	0.945232	0.703658	2.15621	0.00105605	NA	NA	NA	NA
hsa-miR-15a-5p	IGFBP5	-0.259432	0.256103	1.29452	0.177581	2.15621	0.00105605	NA	NA	HITS-CLIP	NA
hsa-miR-15a-5p	TGFB1	-0.298211	0.189179	0.887273	0.585925	2.15621	0.00105605	NA	NA	NA	NA
hsa-miR-15a-5p	SMAD2	-0.323417	0.152687	1.18533	0.0540127	2.15621	0.00105605	NA	NA	HITS-CLIP	NA
hsa-miR-15a-5p	ADAMTS5	-0.344617	0.126057	1.36417	0.016705	2.15621	0.00105605	-0.226	NA	HITS-CLIP	NA
hsa-miR-15a-5p	VEGFA	-0.533504	0.0127498	1.17721	0.27403	2.15621	0.00105605	-0.52	NA	HITS-CLIP	PAR-CLIP
hsa-miR-15a-5p	GDF5	-0.537856	0.0119067	1.23117	0.309402	2.15621	0.00105605	NA	NA	NA	NA
hsa-miR-15b-3p	GAS5	0.333216	0.13993	1.0647	0.746685	2.93635	3.56016e-05	NA	NA	NA	NA
hsa-miR-15b-3p	IL1B	0.207783	0.366103	0.864069	0.884336	2.93635	3.56016e-05	NA	NA	NA	NA
hsa-miR-15b-3p	INPP5D	0.158434	0.492756	0.933643	0.71454	2.93635	3.56016e-05	NA	NA	NA	NA
hsa-miR-15b-3p	CHRDL1	0.0694169	0.764948	1.49435	0.292121	2.93635	3.56016e-05	NA	NA	NA	NA
hsa-miR-15b-3p	CEBPB	0.0125461	0.956955	0.939753	0.736829	2.93635	3.56016e-05	NA	NA	NA	NA
hsa-miR-15b-3p	SOX9	0.00975641	0.966521	0.862275	0.223147	2.93635	3.56016e-05	NA	NA	NA	NA
hsa-miR-15b-3p	MMP13	-0.0465031	0.841353	0.895583	0.834042	2.93635	3.56016e-05	NA	NA	NA	NA
hsa-miR-15b-3p	BCL2	-0.099432	0.668055	1.1389	0.259904	2.93635	3.56016e-05	NA	NA	NA	NA
hsa-miR-15b-3p	SIRT1	-0.139031	0.547813	0.945232	0.703658	2.93635	3.56016e-05	NA	NA	NA	NA
hsa-miR-15b-3p	ACVR2B	-0.202386	0.378961	0.958292	0.798923	2.93635	3.56016e-05	NA	NA	NA	NA
hsa-miR-15b-3p	COL2A1	-0.237344	0.300228	1.00858	0.986423	2.93635	3.56016e-05	NA	NA	NA	NA
hsa-miR-15b-3p	SMAD4	-0.271331	0.23415	1.08483	0.392856	2.93635	3.56016e-05	NA	NA	NA	NA
hsa-miR-15b-3p	TGFB1	-0.315767	0.163197	0.887273	0.585925	2.93635	3.56016e-05	NA	NA	NA	NA
hsa-miR-15b-3p	ADAMTS5	-0.31589	0.163024	1.36417	0.016705	2.93635	3.56016e-05	NA	NA	NA	NA
hsa-miR-15b-3p	SMAD2	-0.322531	0.15388	1.18533	0.0540127	2.93635	3.56016e-05	NA	NA	NA	NA
hsa-miR-15b-3p	IGFBP5	-0.367978	0.100754	1.29452	0.177581	2.93635	3.56016e-05	NA	NA	NA	NA
hsa-miR-15b-3p	VEGFA	-0.400589	0.0719322	1.17721	0.27403	2.93635	3.56016e-05	NA	NA	NA	NA
hsa-miR-15b-3p	GDF5	-0.52512	0.0145103	1.23117	0.309402	2.93635	3.56016e-05	NA	NA	NA	NA
hsa-miR-16-2-3p	SIRT1	0.222587	0.332144	0.945232	0.703658	2.52113	0.000414667	NA	NA	NA	NA
hsa-miR-16-2-3p	INPP5D	0.160553	0.486914	0.933643	0.71454	2.52113	0.000414667	NA	NA	NA	NA
hsa-miR-16-2-3p	TGFB1	0.116785	0.614166	0.887273	0.585925	2.52113	0.000414667	NA	NA	NA	NA
hsa-miR-16-2-3p	ADAMTS5	0.112401	0.627615	1.36417	0.016705	2.52113	0.000414667	NA	NA	NA	NA
hsa-miR-16-2-3p	SOX9	0.0798104	0.730928	0.862275	0.223147	2.52113	0.000414667	NA	NA	NA	NA
hsa-miR-16-2-3p	IL1B	0.053524	0.817763	0.864069	0.884336	2.52113	0.000414667	NA	NA	NA	NA
hsa-miR-16-2-3p	CHRDL1	0.0323486	0.889293	1.49435	0.292121	2.52113	0.000414667	NA	NA	NA	NA
hsa-miR-16-2-3p	GAS5	-0.0107404	0.963146	1.0647	0.746685	2.52113	0.000414667	NA	NA	NA	NA
hsa-miR-16-2-3p	SMAD2	-0.0246648	0.915485	1.18533	0.0540127	2.52113	0.000414667	NA	NA	NA	NA
hsa-miR-16-2-3p	ACVR2B	-0.0303899	0.89596	0.958292	0.798923	2.52113	0.000414667	NA	NA	NA	NA
hsa-miR-16-2-3p	MMP13	-0.0422188	0.855815	0.895583	0.834042	2.52113	0.000414667	NA	NA	NA	NA
hsa-miR-16-2-3p	SMAD4	-0.0637092	0.783813	1.08483	0.392856	2.52113	0.000414667	NA	NA	NA	NA
hsa-miR-16-2-3p	BCL2	-0.0684169	0.768244	1.1389	0.259904	2.52113	0.000414667	NA	NA	NA	NA
hsa-miR-16-2-3p	IGFBP5	-0.113027	0.625688	1.29452	0.177581	2.52113	0.000414667	NA	NA	NA	HITS-CLIP
hsa-miR-16-2-3p	CEBPB	-0.22613	0.324306	0.939753	0.736829	2.52113	0.000414667	NA	NA	NA	NA
hsa-miR-16-2-3p	VEGFA	-0.269178	0.238028	1.17721	0.27403	2.52113	0.000414667	NA	NA	NA	NA
hsa-miR-16-2-3p	COL2A1	-0.41963	0.0582615	1.00858	0.986423	2.52113	0.000414667	NA	NA	NA	NA
hsa-miR-16-2-3p	GDF5	-0.497636	0.0217047	1.23117	0.309402	2.52113	0.000414667	NA	NA	NA	NA
hsa-miR-16-5p	GAS5	0.475001	0.0295564	1.0647	0.746685	2.96142	0.000994222	NA	NA	NA	NA
hsa-miR-16-5p	IL1B	0.280565	0.217983	0.864069	0.884336	2.96142	0.000994222	NA	NA	NA	NA
hsa-miR-16-5p	CEBPB	0.247101	0.280197	0.939753	0.736829	2.96142	0.000994222	NA	NA	NA	NA
hsa-miR-16-5p	INPP5D	0.0778195	0.737409	0.933643	0.71454	2.96142	0.000994222	NA	NA	NA	NA
hsa-miR-16-5p	MMP13	0.0306642	0.895026	0.895583	0.834042	2.96142	0.000994222	NA	NA	NA	NA
hsa-miR-16-5p	TGFB1	-0.0844549	0.715878	0.887273	0.585925	2.96142	0.000994222	NA	NA	NA	NA
hsa-miR-16-5p	CHRDL1	-0.0848217	0.714693	1.49435	0.292121	2.96142	0.000994222	NA	NA	NA	NA
hsa-miR-16-5p	ACVR2B	-0.191772	0.404976	0.958292	0.798923	2.96142	0.000994222	-0.29	NA	PAR-CLIP	NA
hsa-miR-16-5p	SMAD4	-0.198239	0.38901	1.08483	0.392856	2.96142	0.000994222	NA	NA	NA	NA
hsa-miR-16-5p	GDF5	-0.23828	0.29827	1.23117	0.309402	2.96142	0.000994222	NA	NA	NA	NA
hsa-miR-16-5p	BCL2	-0.239423	0.295888	1.1389	0.259904	2.96142	0.000994222	-0.27	NA	HITS-CLIP	Western blot
hsa-miR-16-5p	ADAMTS5	-0.247858	0.278677	1.36417	0.016705	2.96142	0.000994222	-0.237	NA	NA	NA
hsa-miR-16-5p	SOX9	-0.250502	0.273416	0.862275	0.223147	2.96142	0.000994222	NA	NA	NA	NA
hsa-miR-16-5p	COL2A1	-0.340893	0.130476	1.00858	0.986423	2.96142	0.000994222	NA	NA	NA	NA
hsa-miR-16-5p	SIRT1	-0.342413	0.128658	0.945232	0.703658	2.96142	0.000994222	NA	NA	NA	NA
hsa-miR-16-5p	VEGFA	-0.389153	0.0812264	1.17721	0.27403	2.96142	0.000994222	-0.552	NA	qPCR	PAR-CLIP
hsa-miR-16-5p	IGFBP5	-0.390787	0.0798456	1.29452	0.177581	2.96142	0.000994222	NA	NA	HITS-CLIP	NA
hsa-miR-16-5p	SMAD2	-0.578396	0.00601997	1.18533	0.0540127	2.96142	0.000994222	NA	NA	HITS-CLIP	NA
hsa-miR-17-5p	GAS5	0.33871	0.133116	1.0647	0.746685	1.78332	0.000207417	NA	NA	NA	NA
hsa-miR-17-5p	INPP5D	0.28446	0.211389	0.933643	0.71454	1.78332	0.000207417	NA	NA	NA	NA
hsa-miR-17-5p	CHRDL1	0.279613	0.219613	1.49435	0.292121	1.78332	0.000207417	NA	NA	NA	NA
hsa-miR-17-5p	IL1B	0.176567	0.443896	0.864069	0.884336	1.78332	0.000207417	NA	NA	NA	NA
hsa-miR-17-5p	SMAD4	0.121772	0.59901	1.08483	0.392856	1.78332	0.000207417	NA	NA	PAR-CLIP	PAR-CLIP
hsa-miR-17-5p	CEBPB	0.0730735	0.752928	0.939753	0.736829	1.78332	0.000207417	NA	NA	NA	NA
hsa-miR-17-5p	ACVR2B	0.0692888	0.76537	0.958292	0.798923	1.78332	0.000207417	NA	NA	NA	NA
hsa-miR-17-5p	BCL2	-0.00246395	0.991543	1.1389	0.259904	1.78332	0.000207417	NA	NA	Western Blot	Luciferase reporter assay
hsa-miR-17-5p	TGFB1	-0.0391294	0.866271	0.887273	0.585925	1.78332	0.000207417	NA	NA	NA	qRT-PCR
hsa-miR-17-5p	IGFBP5	-0.0775897	0.738158	1.29452	0.177581	1.78332	0.000207417	NA	NA	PAR-CLIP	CLASH
hsa-miR-17-5p	SOX9	-0.126655	0.584324	0.862275	0.223147	1.78332	0.000207417	NA	NA	NA	NA
hsa-miR-17-5p	MMP13	-0.143458	0.535013	0.895583	0.834042	1.78332	0.000207417	NA	NA	NA	NA
hsa-miR-17-5p	SIRT1	-0.176347	0.444472	0.945232	0.703658	1.78332	0.000207417	NA	NA	NA	NA
hsa-miR-17-5p	ADAMTS5	-0.225715	0.325218	1.36417	0.016705	1.78332	0.000207417	-0.01	NA	NA	NA
hsa-miR-17-5p	COL2A1	-0.260942	0.253247	1.00858	0.986423	1.78332	0.000207417	NA	NA	NA	NA
hsa-miR-17-5p	SMAD2	-0.329431	0.144765	1.18533	0.0540127	1.78332	0.000207417	NA	NA	HITS-CLIP	NA
hsa-miR-17-5p	VEGFA	-0.411563	0.0637878	1.17721	0.27403	1.78332	0.000207417	-0.133	NA	qPCR	ELISA//Luciferase reporter assay
hsa-miR-17-5p	GDF5	-0.480894	0.0273247	1.23117	0.309402	1.78332	0.000207417	NA	NA	NA	NA
hsa-miR-182-5p	GAS5	0.557933	0.00858315	1.0647	0.746685	3.30493	1.21891e-06	NA	NA	NA	NA
hsa-miR-182-5p	CEBPB	0.417462	0.0597092	0.939753	0.736829	3.30493	1.21891e-06	NA	NA	NA	NA
hsa-miR-182-5p	IL1B	0.295763	0.193013	0.864069	0.884336	3.30493	1.21891e-06	NA	NA	NA	NA
hsa-miR-182-5p	TGFB1	0.215142	0.348981	0.887273	0.585925	3.30493	1.21891e-06	NA	NA	NA	NA
hsa-miR-182-5p	CHRDL1	0.119693	0.605311	1.49435	0.292121	3.30493	1.21891e-06	NA	NA	NA	NA
hsa-miR-182-5p	INPP5D	0.0825079	0.722175	0.933643	0.71454	3.30493	1.21891e-06	NA	NA	NA	NA
hsa-miR-182-5p	MMP13	0.00258444	0.991129	0.895583	0.834042	3.30493	1.21891e-06	NA	NA	NA	NA
hsa-miR-182-5p	ADAMTS5	-0.0166971	0.942733	1.36417	0.016705	3.30493	1.21891e-06	NA	NA	NA	NA
hsa-miR-182-5p	SMAD4	-0.1078	0.64185	1.08483	0.392856	3.30493	1.21891e-06	NA	NA	Luciferase Reporter Assay	Luciferase reporter assay
hsa-miR-182-5p	ACVR2B	-0.119987	0.604418	0.958292	0.798923	3.30493	1.21891e-06	NA	NA	NA	NA
hsa-miR-182-5p	IGFBP5	-0.25911	0.256715	1.29452	0.177581	3.30493	1.21891e-06	NA	NA	NA	NA
hsa-miR-182-5p	SIRT1	-0.307661	0.174868	0.945232	0.703658	3.30493	1.21891e-06	NA	NA	HITS-CLIP	NA
hsa-miR-182-5p	BCL2	-0.321818	0.154844	1.1389	0.259904	3.30493	1.21891e-06	-0.173	NA	HITS-CLIP	qRT-PCR
hsa-miR-182-5p	GDF5	-0.345798	0.124679	1.23117	0.309402	3.30493	1.21891e-06	NA	NA	NA	NA
hsa-miR-182-5p	SOX9	-0.353924	0.115485	0.862275	0.223147	3.30493	1.21891e-06	NA	NA	NA	NA
hsa-miR-182-5p	COL2A1	-0.36964	0.0991083	1.00858	0.986423	3.30493	1.21891e-06	NA	NA	NA	NA
hsa-miR-182-5p	VEGFA	-0.384733	0.0850478	1.17721	0.27403	3.30493	1.21891e-06	NA	NA	NA	NA
hsa-miR-182-5p	SMAD2	-0.558914	0.00844263	1.18533	0.0540127	3.30493	1.21891e-06	NA	NA	NA	NA
hsa-miR-183-5p	GAS5	0.402422	0.0705198	1.0647	0.746685	2.60747	1.03366e-05	NA	NA	NA	NA
hsa-miR-183-5p	CEBPB	0.263541	0.24838	0.939753	0.736829	2.60747	1.03366e-05	NA	NA	NA	NA
hsa-miR-183-5p	TGFB1	0.254318	0.265931	0.887273	0.585925	2.60747	1.03366e-05	NA	NA	NA	NA
hsa-miR-183-5p	CHRDL1	0.201237	0.381729	1.49435	0.292121	2.60747	1.03366e-05	NA	NA	NA	NA
hsa-miR-183-5p	IL1B	0.183133	0.426853	0.864069	0.884336	2.60747	1.03366e-05	NA	NA	NA	NA
hsa-miR-183-5p	INPP5D	0.120582	0.602612	0.933643	0.71454	2.60747	1.03366e-05	NA	NA	NA	NA
hsa-miR-183-5p	ADAMTS5	0.056157	0.808954	1.36417	0.016705	2.60747	1.03366e-05	NA	NA	NA	NA
hsa-miR-183-5p	MMP13	-0.0328322	0.887648	0.895583	0.834042	2.60747	1.03366e-05	NA	NA	NA	NA
hsa-miR-183-5p	SMAD4	-0.0629594	0.7863	1.08483	0.392856	2.60747	1.03366e-05	NA	NA	PAR-CLIP	Immunohistochemistry//Luciferase reporter assay//qRT-PCR//Western blot
hsa-miR-183-5p	SIRT1	-0.108371	0.640077	0.945232	0.703658	2.60747	1.03366e-05	NA	NA	NA	NA
hsa-miR-183-5p	ACVR2B	-0.121433	0.600037	0.958292	0.798923	2.60747	1.03366e-05	NA	NA	HITS-CLIP	NA
hsa-miR-183-5p	SOX9	-0.174668	0.44889	0.862275	0.223147	2.60747	1.03366e-05	NA	NA	NA	NA
hsa-miR-183-5p	IGFBP5	-0.187107	0.416712	1.29452	0.177581	2.60747	1.03366e-05	NA	NA	NA	NA
hsa-miR-183-5p	BCL2	-0.191613	0.405373	1.1389	0.259904	2.60747	1.03366e-05	NA	NA	NA	NA
hsa-miR-183-5p	COL2A1	-0.315201	0.163994	1.00858	0.986423	2.60747	1.03366e-05	NA	NA	NA	NA
hsa-miR-183-5p	VEGFA	-0.328262	0.146282	1.17721	0.27403	2.60747	1.03366e-05	NA	NA	NA	NA
hsa-miR-183-5p	SMAD2	-0.376081	0.092914	1.18533	0.0540127	2.60747	1.03366e-05	NA	NA	NA	NA
hsa-miR-183-5p	GDF5	-0.455096	0.0381759	1.23117	0.309402	2.60747	1.03366e-05	NA	NA	NA	NA
hsa-miR-185-3p	CHRDL1	0.408176	0.0662224	1.49435	0.292121	1.47808	0.0303154	NA	NA	NA	NA
hsa-miR-185-3p	SMAD4	0.367701	0.10103	1.08483	0.392856	1.47808	0.0303154	NA	NA	HITS-CLIP	NA
hsa-miR-185-3p	INPP5D	0.345213	0.12536	0.933643	0.71454	1.47808	0.0303154	NA	NA	NA	NA
hsa-miR-185-3p	SIRT1	0.297871	0.189709	0.945232	0.703658	1.47808	0.0303154	NA	NA	NA	NA
hsa-miR-185-3p	IGFBP5	0.27611	0.225688	1.29452	0.177581	1.47808	0.0303154	NA	NA	NA	NA
hsa-miR-185-3p	SMAD2	0.274927	0.227763	1.18533	0.0540127	1.47808	0.0303154	NA	NA	HITS-CLIP	NA
hsa-miR-185-3p	ADAMTS5	0.256227	0.262235	1.36417	0.016705	1.47808	0.0303154	NA	NA	NA	NA
hsa-miR-185-3p	ACVR2B	0.208116	0.365319	0.958292	0.798923	1.47808	0.0303154	NA	NA	NA	NA
hsa-miR-185-3p	BCL2	0.0388564	0.867196	1.1389	0.259904	1.47808	0.0303154	NA	NA	NA	NA
hsa-miR-185-3p	SOX9	0.0356797	0.877971	0.862275	0.223147	1.47808	0.0303154	NA	NA	PAR-CLIP	NA
hsa-miR-185-3p	IL1B	-0.0115766	0.960279	0.864069	0.884336	1.47808	0.0303154	NA	NA	NA	NA
hsa-miR-185-3p	COL2A1	-0.05059	0.827604	1.00858	0.986423	1.47808	0.0303154	NA	NA	NA	NA
hsa-miR-185-3p	GAS5	-0.0989805	0.66948	1.0647	0.746685	1.47808	0.0303154	NA	NA	NA	NA
hsa-miR-185-3p	MMP13	-0.114731	0.620452	0.895583	0.834042	1.47808	0.0303154	NA	NA	NA	NA
hsa-miR-185-3p	TGFB1	-0.173248	0.452643	0.887273	0.585925	1.47808	0.0303154	NA	NA	NA	NA
hsa-miR-185-3p	CEBPB	-0.194513	0.398166	0.939753	0.736829	1.47808	0.0303154	NA	NA	NA	NA
hsa-miR-185-3p	VEGFA	-0.202481	0.378731	1.17721	0.27403	1.47808	0.0303154	NA	NA	HITS-CLIP	NA
hsa-miR-185-3p	GDF5	-0.576793	0.00619466	1.23117	0.309402	1.47808	0.0303154	NA	NA	NA	NA
hsa-miR-185-5p	CHRDL1	0.488762	0.0245555	1.49435	0.292121	1.38143	0.0088528	NA	NA	NA	PAR-CLIP
hsa-miR-185-5p	CEBPB	0.256405	0.261891	0.939753	0.736829	1.38143	0.0088528	NA	NA	NA	NA
hsa-miR-185-5p	IGFBP5	0.221209	0.335224	1.29452	0.177581	1.38143	0.0088528	NA	NA	HITS-CLIP	PAR-CLIP
hsa-miR-185-5p	SMAD4	0.204054	0.374959	1.08483	0.392856	1.38143	0.0088528	NA	NA	NA	NA
hsa-miR-185-5p	COL2A1	0.156925	0.496938	1.00858	0.986423	1.38143	0.0088528	NA	NA	NA	NA
hsa-miR-185-5p	TGFB1	0.153065	0.507715	0.887273	0.585925	1.38143	0.0088528	NA	NA	NA	NA
hsa-miR-185-5p	GAS5	0.147069	0.524673	1.0647	0.746685	1.38143	0.0088528	NA	NA	NA	NA
hsa-miR-185-5p	ADAMTS5	0.10668	0.645337	1.36417	0.016705	1.38143	0.0088528	NA	NA	NA	NA
hsa-miR-185-5p	IL1B	0.095802	0.679541	0.864069	0.884336	1.38143	0.0088528	NA	NA	NA	NA
hsa-miR-185-5p	ACVR2B	0.0854807	0.712567	0.958292	0.798923	1.38143	0.0088528	NA	NA	NA	NA
hsa-miR-185-5p	BCL2	0.0481128	0.835932	1.1389	0.259904	1.38143	0.0088528	NA	NA	NA	NA
hsa-miR-185-5p	VEGFA	0.0095669	0.967171	1.17721	0.27403	1.38143	0.0088528	NA	NA	HITS-CLIP	Luciferase reporter assay//Western blot
hsa-miR-185-5p	INPP5D	0.00892896	0.969359	0.933643	0.71454	1.38143	0.0088528	NA	NA	NA	NA
hsa-miR-185-5p	GDF5	-0.0276473	0.905307	1.23117	0.309402	1.38143	0.0088528	NA	NA	NA	NA
hsa-miR-185-5p	MMP13	-0.028131	0.903658	0.895583	0.834042	1.38143	0.0088528	NA	NA	NA	NA
hsa-miR-185-5p	SIRT1	-0.104036	0.653589	0.945232	0.703658	1.38143	0.0088528	NA	NA	NA	NA
hsa-miR-185-5p	SMAD2	-0.141037	0.541996	1.18533	0.0540127	1.38143	0.0088528	NA	NA	NA	NA
hsa-miR-185-5p	SOX9	-0.141771	0.539874	0.862275	0.223147	1.38143	0.0088528	NA	NA	NA	NA
hsa-miR-192-5p	GAS5	0.332593	0.140717	1.0647	0.746685	1.44682	0.00157188	NA	NA	NA	NA
hsa-miR-192-5p	INPP5D	0.293721	0.19625	0.933643	0.71454	1.44682	0.00157188	NA	NA	NA	NA
hsa-miR-192-5p	IL1B	0.229039	0.317952	0.864069	0.884336	1.44682	0.00157188	NA	NA	NA	NA
hsa-miR-192-5p	CEBPB	0.169256	0.463284	0.939753	0.736829	1.44682	0.00157188	NA	NA	NA	NA
hsa-miR-192-5p	ADAMTS5	0.152707	0.508718	1.36417	0.016705	1.44682	0.00157188	NA	NA	NA	NA
hsa-miR-192-5p	CHRDL1	0.112596	0.627013	1.49435	0.292121	1.44682	0.00157188	NA	NA	NA	NA
hsa-miR-192-5p	TGFB1	0.0810025	0.727056	0.887273	0.585925	1.44682	0.00157188	NA	NA	NA	NA
hsa-miR-192-5p	MMP13	-0.010061	0.965476	0.895583	0.834042	1.44682	0.00157188	NA	NA	NA	NA
hsa-miR-192-5p	SMAD4	-0.0498287	0.830162	1.08483	0.392856	1.44682	0.00157188	NA	NA	NA	NA
hsa-miR-192-5p	ACVR2B	-0.152227	0.510068	0.958292	0.798923	1.44682	0.00157188	-0.116	NA	Microarrays	Microarray
hsa-miR-192-5p	SIRT1	-0.156327	0.4986	0.945232	0.703658	1.44682	0.00157188	NA	NA	Microarrays	Microarray
hsa-miR-192-5p	IGFBP5	-0.21743	0.343755	1.29452	0.177581	1.44682	0.00157188	NA	NA	NA	NA
hsa-miR-192-5p	SMAD2	-0.264514	0.246571	1.18533	0.0540127	1.44682	0.00157188	NA	NA	NA	NA
hsa-miR-192-5p	SOX9	-0.281919	0.215675	0.862275	0.223147	1.44682	0.00157188	NA	NA	NA	NA
hsa-miR-192-5p	COL2A1	-0.372581	0.0962428	1.00858	0.986423	1.44682	0.00157188	NA	NA	NA	NA
hsa-miR-192-5p	BCL2	-0.377698	0.0914041	1.1389	0.259904	1.44682	0.00157188	NA	NA	Microarrays	Luciferase reporter assay//qRT-PCR//Reporter assay;Microarray;Other
hsa-miR-192-5p	VEGFA	-0.518096	0.0161321	1.17721	0.27403	1.44682	0.00157188	NA	NA	NA	NA
hsa-miR-192-5p	GDF5	-0.547943	0.0101262	1.23117	0.309402	1.44682	0.00157188	NA	NA	NA	NA
hsa-miR-193b-3p	COL2A1	0.314822	0.164529	1.00858	0.986423	0.738394	0.0225148	NA	NA	NA	NA
hsa-miR-193b-3p	IGFBP5	0.252853	0.268787	1.29452	0.177581	0.738394	0.0225148	-0.532	NA	HITS-CLIP	PAR-CLIP
hsa-miR-193b-3p	CHRDL1	0.248361	0.277672	1.49435	0.292121	0.738394	0.0225148	NA	NA	NA	NA
hsa-miR-193b-3p	SMAD2	0.192006	0.404393	1.18533	0.0540127	0.738394	0.0225148	NA	NA	NA	NA
hsa-miR-193b-3p	BCL2	0.158882	0.491518	1.1389	0.259904	0.738394	0.0225148	NA	NA	NA	NA
hsa-miR-193b-3p	SMAD4	0.155206	0.501724	1.08483	0.392856	0.738394	0.0225148	NA	NA	NA	NA
hsa-miR-193b-3p	ACVR2B	0.146489	0.526325	0.958292	0.798923	0.738394	0.0225148	NA	NA	NA	NA
hsa-miR-193b-3p	SOX9	0.0618619	0.789944	0.862275	0.223147	0.738394	0.0225148	NA	NA	NA	NA
hsa-miR-193b-3p	VEGFA	0.0526408	0.820722	1.17721	0.27403	0.738394	0.0225148	NA	NA	NA	NA
hsa-miR-193b-3p	SIRT1	0.0242398	0.916936	0.945232	0.703658	0.738394	0.0225148	NA	NA	NA	NA
hsa-miR-193b-3p	INPP5D	0.0241413	0.917273	0.933643	0.71454	0.738394	0.0225148	NA	NA	NA	NA
hsa-miR-193b-3p	IL1B	-0.0032035	0.989004	0.864069	0.884336	0.738394	0.0225148	NA	NA	NA	NA
hsa-miR-193b-3p	GAS5	-0.0361798	0.876274	1.0647	0.746685	0.738394	0.0225148	NA	NA	NA	NA
hsa-miR-193b-3p	GDF5	-0.0433533	0.851981	1.23117	0.309402	0.738394	0.0225148	NA	NA	NA	NA
hsa-miR-193b-3p	CEBPB	-0.0820566	0.723637	0.939753	0.736829	0.738394	0.0225148	NA	NA	NA	NA
hsa-miR-193b-3p	ADAMTS5	-0.0874115	0.706349	1.36417	0.016705	0.738394	0.0225148	NA	NA	NA	NA
hsa-miR-193b-3p	MMP13	-0.127455	0.581935	0.895583	0.834042	0.738394	0.0225148	NA	NA	NA	NA
hsa-miR-193b-3p	TGFB1	-0.424314	0.0552254	0.887273	0.585925	0.738394	0.0225148	NA	NA	NA	NA
hsa-miR-194-5p	GAS5	0.377121	0.0919404	1.0647	0.746685	2.40478	0.000946751	NA	NA	NA	NA
hsa-miR-194-5p	CHRDL1	0.244947	0.284544	1.49435	0.292121	2.40478	0.000946751	NA	NA	NA	NA
hsa-miR-194-5p	INPP5D	0.190309	0.408638	0.933643	0.71454	2.40478	0.000946751	NA	NA	NA	NA
hsa-miR-194-5p	CEBPB	0.0988093	0.67002	0.939753	0.736829	2.40478	0.000946751	NA	NA	NA	NA
hsa-miR-194-5p	SMAD4	-0.00640914	0.978003	1.08483	0.392856	2.40478	0.000946751	NA	NA	NA	NA
hsa-miR-194-5p	IL1B	-0.0257642	0.911731	0.864069	0.884336	2.40478	0.000946751	NA	NA	NA	NA
hsa-miR-194-5p	SIRT1	-0.0363192	0.8758	0.945232	0.703658	2.40478	0.000946751	NA	NA	NA	NA
hsa-miR-194-5p	ACVR2B	-0.0384231	0.868664	0.958292	0.798923	2.40478	0.000946751	-0.223	NA	HITS-CLIP	Luciferase reporter assay//Western blot
hsa-miR-194-5p	SOX9	-0.0437331	0.850698	0.862275	0.223147	2.40478	0.000946751	NA	NA	NA	NA
hsa-miR-194-5p	TGFB1	-0.0721799	0.75586	0.887273	0.585925	2.40478	0.000946751	NA	NA	NA	NA
hsa-miR-194-5p	BCL2	-0.0910641	0.694635	1.1389	0.259904	2.40478	0.000946751	NA	NA	NA	NA
hsa-miR-194-5p	MMP13	-0.114888	0.619971	0.895583	0.834042	2.40478	0.000946751	NA	NA	NA	NA
hsa-miR-194-5p	ADAMTS5	-0.121435	0.600029	1.36417	0.016705	2.40478	0.000946751	NA	NA	NA	NA
hsa-miR-194-5p	IGFBP5	-0.130228	0.57368	1.29452	0.177581	2.40478	0.000946751	NA	NA	HITS-CLIP	NA
hsa-miR-194-5p	COL2A1	-0.135941	0.556833	1.00858	0.986423	2.40478	0.000946751	NA	NA	NA	NA
hsa-miR-194-5p	VEGFA	-0.29078	0.200977	1.17721	0.27403	2.40478	0.000946751	NA	NA	NA	NA
hsa-miR-194-5p	GDF5	-0.369359	0.0993846	1.23117	0.309402	2.40478	0.000946751	NA	NA	NA	NA
hsa-miR-194-5p	SMAD2	-0.417948	0.0593829	1.18533	0.0540127	2.40478	0.000946751	NA	NA	NA	NA
hsa-miR-196a-5p	GAS5	0.142827	0.536827	1.0647	0.746685	1.97524	0.0130519	NA	NA	NA	NA
hsa-miR-196a-5p	IL1B	0.135831	0.557154	0.864069	0.884336	1.97524	0.0130519	NA	NA	NA	NA
hsa-miR-196a-5p	MMP13	0.127648	0.581359	0.895583	0.834042	1.97524	0.0130519	NA	NA	NA	NA
hsa-miR-196a-5p	CEBPB	0.119534	0.605794	0.939753	0.736829	1.97524	0.0130519	NA	NA	NA	NA
hsa-miR-196a-5p	INPP5D	0.0673712	0.771695	0.933643	0.71454	1.97524	0.0130519	NA	NA	NA	NA
hsa-miR-196a-5p	TGFB1	0.0670111	0.772884	0.887273	0.585925	1.97524	0.0130519	NA	NA	NA	NA
hsa-miR-196a-5p	GDF5	0.028817	0.901319	1.23117	0.309402	1.97524	0.0130519	NA	NA	NA	NA
hsa-miR-196a-5p	ACVR2B	0.00849828	0.970836	0.958292	0.798923	1.97524	0.0130519	NA	NA	PAR-CLIP	PAR-CLIP
hsa-miR-196a-5p	SMAD4	-0.0715366	0.757973	1.08483	0.392856	1.97524	0.0130519	NA	NA	PAR-CLIP	NA
hsa-miR-196a-5p	VEGFA	-0.082706	0.721533	1.17721	0.27403	1.97524	0.0130519	NA	NA	NA	NA
hsa-miR-196a-5p	ADAMTS5	-0.104797	0.651211	1.36417	0.016705	1.97524	0.0130519	NA	NA	NA	NA
hsa-miR-196a-5p	CHRDL1	-0.109356	0.637023	1.49435	0.292121	1.97524	0.0130519	NA	NA	NA	NA
hsa-miR-196a-5p	SIRT1	-0.149093	0.518918	0.945232	0.703658	1.97524	0.0130519	NA	NA	NA	NA
hsa-miR-196a-5p	SOX9	-0.157856	0.494355	0.862275	0.223147	1.97524	0.0130519	NA	NA	NA	NA
hsa-miR-196a-5p	BCL2	-0.173058	0.453147	1.1389	0.259904	1.97524	0.0130519	NA	NA	NA	NA
hsa-miR-196a-5p	IGFBP5	-0.181887	0.430059	1.29452	0.177581	1.97524	0.0130519	NA	NA	NA	NA
hsa-miR-196a-5p	COL2A1	-0.267578	0.240937	1.00858	0.986423	1.97524	0.0130519	NA	NA	NA	NA
hsa-miR-196a-5p	SMAD2	-0.305425	0.178184	1.18533	0.0540127	1.97524	0.0130519	NA	NA	NA	NA
hsa-miR-197-3p	CHRDL1	0.387119	0.0829687	1.49435	0.292121	0.652599	0.0267753	NA	NA	NA	NA
hsa-miR-197-3p	INPP5D	0.329972	0.144066	0.933643	0.71454	0.652599	0.0267753	NA	NA	NA	NA
hsa-miR-197-3p	ACVR2B	0.316687	0.161907	0.958292	0.798923	0.652599	0.0267753	NA	NA	HITS-CLIP	NA
hsa-miR-197-3p	SMAD4	0.267804	0.240524	1.08483	0.392856	0.652599	0.0267753	NA	NA	NA	NA
hsa-miR-197-3p	IL1B	0.24815	0.278094	0.864069	0.884336	0.652599	0.0267753	NA	NA	NA	NA
hsa-miR-197-3p	IGFBP5	0.238836	0.29711	1.29452	0.177581	0.652599	0.0267753	NA	NA	HITS-CLIP	HITS-CLIP
hsa-miR-197-3p	CEBPB	0.1347	0.560472	0.939753	0.736829	0.652599	0.0267753	NA	NA	NA	NA
hsa-miR-197-3p	COL2A1	0.102193	0.659367	1.00858	0.986423	0.652599	0.0267753	NA	NA	NA	NA
hsa-miR-197-3p	GAS5	0.0851523	0.713626	1.0647	0.746685	0.652599	0.0267753	NA	NA	NA	NA
hsa-miR-197-3p	SMAD2	0.0241227	0.917336	1.18533	0.0540127	0.652599	0.0267753	NA	NA	NA	NA
hsa-miR-197-3p	MMP13	0.0150412	0.948405	0.895583	0.834042	0.652599	0.0267753	NA	NA	NA	NA
hsa-miR-197-3p	BCL2	-0.0363222	0.87579	1.1389	0.259904	0.652599	0.0267753	NA	NA	NA	NA
hsa-miR-197-3p	ADAMTS5	-0.11548	0.618157	1.36417	0.016705	0.652599	0.0267753	NA	NA	HITS-CLIP	NA
hsa-miR-197-3p	GDF5	-0.123595	0.59351	1.23117	0.309402	0.652599	0.0267753	NA	NA	NA	NA
hsa-miR-197-3p	VEGFA	-0.17497	0.448095	1.17721	0.27403	0.652599	0.0267753	NA	NA	NA	NA
hsa-miR-197-3p	TGFB1	-0.188724	0.412624	0.887273	0.585925	0.652599	0.0267753	NA	NA	NA	NA
hsa-miR-197-3p	SOX9	-0.199229	0.386598	0.862275	0.223147	0.652599	0.0267753	NA	NA	NA	NA
hsa-miR-197-3p	SIRT1	-0.252759	0.268972	0.945232	0.703658	0.652599	0.0267753	NA	NA	NA	NA
hsa-miR-19b-3p	GAS5	0.358277	0.110765	1.0647	0.746685	1.70483	0.00470517	NA	NA	NA	NA
hsa-miR-19b-3p	CHRDL1	0.322908	0.153372	1.49435	0.292121	1.70483	0.00470517	NA	NA	NA	NA
hsa-miR-19b-3p	COL2A1	0.234428	0.306381	1.00858	0.986423	1.70483	0.00470517	NA	NA	NA	NA
hsa-miR-19b-3p	BCL2	0.165968	0.472142	1.1389	0.259904	1.70483	0.00470517	NA	NA	NA	NA
hsa-miR-19b-3p	CEBPB	0.110234	0.634305	0.939753	0.736829	1.70483	0.00470517	NA	NA	NA	NA
hsa-miR-19b-3p	SOX9	0.0682407	0.768825	0.862275	0.223147	1.70483	0.00470517	NA	NA	NA	NA
hsa-miR-19b-3p	VEGFA	-0.0166267	0.942974	1.17721	0.27403	1.70483	0.00470517	NA	NA	NA	NA
hsa-miR-19b-3p	GDF5	-0.0192672	0.933935	1.23117	0.309402	1.70483	0.00470517	NA	NA	NA	NA
hsa-miR-19b-3p	SMAD4	-0.0443997	0.848447	1.08483	0.392856	1.70483	0.00470517	NA	NA	PAR-CLIP	Luciferase reporter assay
hsa-miR-19b-3p	ACVR2B	-0.0703555	0.761857	0.958292	0.798923	1.70483	0.00470517	NA	NA	NA	NA
hsa-miR-19b-3p	INPP5D	-0.0902396	0.697274	0.933643	0.71454	1.70483	0.00470517	NA	NA	NA	NA
hsa-miR-19b-3p	SIRT1	-0.0918934	0.691985	0.945232	0.703658	1.70483	0.00470517	NA	NA	NA	NA
hsa-miR-19b-3p	IGFBP5	-0.0939507	0.685425	1.29452	0.177581	1.70483	0.00470517	NA	NA	NA	NA
hsa-miR-19b-3p	IL1B	-0.122463	0.596924	0.864069	0.884336	1.70483	0.00470517	NA	NA	NA	NA
hsa-miR-19b-3p	MMP13	-0.127044	0.583161	0.895583	0.834042	1.70483	0.00470517	NA	NA	NA	NA
hsa-miR-19b-3p	ADAMTS5	-0.29678	0.191414	1.36417	0.016705	1.70483	0.00470517	NA	NA	NA	NA
hsa-miR-19b-3p	TGFB1	-0.376309	0.0926998	0.887273	0.585925	1.70483	0.00470517	NA	NA	NA	qRT-PCR
hsa-miR-19b-3p	SMAD2	-0.44761	0.0418826	1.18533	0.0540127	1.70483	0.00470517	NA	NA	NA	NA
hsa-miR-206	ACVR2B	0.466178	0.0331644	0.958292	0.798923	4.9111	3.56279e-06	-0.196	NA	NA	NA
hsa-miR-206	MMP13	0.461447	0.0352362	0.895583	0.834042	4.9111	3.56279e-06	NA	NA	NA	NA
hsa-miR-206	ADAMTS5	0.399162	0.0730458	1.36417	0.016705	4.9111	3.56279e-06	NA	0.679	NA	NA
hsa-miR-206	INPP5D	0.338838	0.132961	0.933643	0.71454	4.9111	3.56279e-06	NA	0.535	NA	NA
hsa-miR-206	VEGFA	0.288396	0.204863	1.17721	0.27403	4.9111	3.56279e-06	-0.199	0.467	NA	NA
hsa-miR-206	GDF5	0.286731	0.207608	1.23117	0.309402	4.9111	3.56279e-06	NA	NA	NA	NA
hsa-miR-206	IGFBP5	0.278889	0.22086	1.29452	0.177581	4.9111	3.56279e-06	-0.16	0.534	NA	NA
hsa-miR-206	IL1B	0.169817	0.461779	0.864069	0.884336	4.9111	3.56279e-06	NA	NA	NA	NA
hsa-miR-206	CHRDL1	0.0946535	0.683189	1.49435	0.292121	4.9111	3.56279e-06	NA	0.491	NA	NA
hsa-miR-206	SMAD4	0.084026	0.717263	1.08483	0.392856	4.9111	3.56279e-06	NA	0.548	NA	NA
hsa-miR-206	SIRT1	0.0580867	0.802512	0.945232	0.703658	4.9111	3.56279e-06	NA	0.675	NA	NA
hsa-miR-206	SOX9	0.0403212	0.862234	0.862275	0.223147	4.9111	3.56279e-06	-0.281	0.721	NA	NA
hsa-miR-206	CEBPB	0.0169042	0.942024	0.939753	0.736829	4.9111	3.56279e-06	NA	NA	NA	NA
hsa-miR-206	TGFB1	-0.00428043	0.985308	0.887273	0.585925	4.9111	3.56279e-06	NA	NA	NA	NA
hsa-miR-206	COL2A1	-0.0425639	0.854648	1.00858	0.986423	4.9111	3.56279e-06	NA	NA	NA	NA
hsa-miR-206	SMAD2	-0.0621752	0.788904	1.18533	0.0540127	4.9111	3.56279e-06	-0.064	0.785	NA	NA
hsa-miR-206	BCL2	-0.291908	0.199154	1.1389	0.259904	4.9111	3.56279e-06	NA	0.486	NA	Flow//qRT-PCR
hsa-miR-206	GAS5	-0.378346	0.0908042	1.0647	0.746685	4.9111	3.56279e-06	NA	NA	NA	NA
hsa-miR-20a-5p	GAS5	0.349484	0.120445	1.0647	0.746685	2.97247	0.000263137	NA	NA	NA	NA
hsa-miR-20a-5p	IL1B	0.103234	0.6561	0.864069	0.884336	2.97247	0.000263137	NA	NA	NA	NA
hsa-miR-20a-5p	INPP5D	0.0951326	0.681667	0.933643	0.71454	2.97247	0.000263137	NA	NA	NA	NA
hsa-miR-20a-5p	CEBPB	0.0807059	0.728019	0.939753	0.736829	2.97247	0.000263137	NA	0.453	NA	NA
hsa-miR-20a-5p	TGFB1	0.0396359	0.864555	0.887273	0.585925	2.97247	0.000263137	NA	NA	NA	NA
hsa-miR-20a-5p	CHRDL1	0.0387457	0.867571	1.49435	0.292121	2.97247	0.000263137	NA	NA	NA	NA
hsa-miR-20a-5p	BCL2	0.0357546	0.877717	1.1389	0.259904	2.97247	0.000263137	NA	0.78	Western Blot	Luciferase reporter assay
hsa-miR-20a-5p	ACVR2B	0.0211079	0.927639	0.958292	0.798923	2.97247	0.000263137	NA	NA	NA	NA
hsa-miR-20a-5p	SMAD4	0.0153418	0.947375	1.08483	0.392856	2.97247	0.000263137	NA	0.809	PAR-CLIP	PAR-CLIP
hsa-miR-20a-5p	SOX9	-0.00916082	0.968563	0.862275	0.223147	2.97247	0.000263137	NA	NA	NA	NA
hsa-miR-20a-5p	SIRT1	-0.117351	0.612437	0.945232	0.703658	2.97247	0.000263137	NA	0.638	NA	NA
hsa-miR-20a-5p	MMP13	-0.132152	0.567981	0.895583	0.834042	2.97247	0.000263137	NA	0.453	NA	NA
hsa-miR-20a-5p	IGFBP5	-0.193331	0.401094	1.29452	0.177581	2.97247	0.000263137	NA	NA	HITS-CLIP	NA
hsa-miR-20a-5p	COL2A1	-0.256833	0.261069	1.00858	0.986423	2.97247	0.000263137	NA	NA	NA	NA
hsa-miR-20a-5p	ADAMTS5	-0.270139	0.236292	1.36417	0.016705	2.97247	0.000263137	-0.01	0.905	HITS-CLIP	NA
hsa-miR-20a-5p	VEGFA	-0.29009	0.202096	1.17721	0.27403	2.97247	0.000263137	-0.147	NA	qPCR	ELISA//Luciferase reporter assay
hsa-miR-20a-5p	SMAD2	-0.397607	0.0742745	1.18533	0.0540127	2.97247	0.000263137	NA	0.561	NA	NA
hsa-miR-20a-5p	GDF5	-0.449281	0.0410318	1.23117	0.309402	2.97247	0.000263137	NA	NA	NA	NA
hsa-miR-20b-5p	CHRDL1	0.349096	0.120885	1.49435	0.292121	2.2674	0.00617465	NA	0.469	NA	NA
hsa-miR-20b-5p	INPP5D	0.206303	0.369603	0.933643	0.71454	2.2674	0.00617465	NA	NA	NA	NA
hsa-miR-20b-5p	GAS5	0.176009	0.445359	1.0647	0.746685	2.2674	0.00617465	NA	NA	NA	NA
hsa-miR-20b-5p	SOX9	0.0970828	0.67548	0.862275	0.223147	2.2674	0.00617465	NA	NA	NA	NA
hsa-miR-20b-5p	SMAD4	0.0930881	0.688173	1.08483	0.392856	2.2674	0.00617465	NA	NA	NA	PAR-CLIP
hsa-miR-20b-5p	ACVR2B	0.0877732	0.705186	0.958292	0.798923	2.2674	0.00617465	NA	NA	NA	NA
hsa-miR-20b-5p	SIRT1	0.08067	0.728135	0.945232	0.703658	2.2674	0.00617465	NA	NA	NA	NA
hsa-miR-20b-5p	BCL2	0.054546	0.814341	1.1389	0.259904	2.2674	0.00617465	NA	NA	NA	NA
hsa-miR-20b-5p	IGFBP5	-0.0299265	0.897539	1.29452	0.177581	2.2674	0.00617465	NA	NA	NA	NA
hsa-miR-20b-5p	CEBPB	-0.0342604	0.882793	0.939753	0.736829	2.2674	0.00617465	NA	NA	NA	NA
hsa-miR-20b-5p	TGFB1	-0.0497059	0.830574	0.887273	0.585925	2.2674	0.00617465	NA	NA	NA	NA
hsa-miR-20b-5p	IL1B	-0.0630161	0.786112	0.864069	0.884336	2.2674	0.00617465	NA	NA	NA	NA
hsa-miR-20b-5p	ADAMTS5	-0.0985743	0.670763	1.36417	0.016705	2.2674	0.00617465	-0.01	NA	NA	NA
hsa-miR-20b-5p	MMP13	-0.124497	0.590797	0.895583	0.834042	2.2674	0.00617465	NA	NA	NA	NA
hsa-miR-20b-5p	COL2A1	-0.153053	0.507746	1.00858	0.986423	2.2674	0.00617465	NA	NA	NA	NA
hsa-miR-20b-5p	SMAD2	-0.202446	0.378816	1.18533	0.0540127	2.2674	0.00617465	NA	NA	HITS-CLIP	NA
hsa-miR-20b-5p	VEGFA	-0.241778	0.291019	1.17721	0.27403	2.2674	0.00617465	-0.133	NA	Luciferase Reporter Assay	ELISA//Luciferase reporter assay
hsa-miR-20b-5p	GDF5	-0.44086	0.0454591	1.23117	0.309402	2.2674	0.00617465	NA	NA	NA	NA
hsa-miR-210-3p	GDF5	0.308169	0.17412	1.23117	0.309402	0.682853	0.0357473	NA	NA	NA	NA
hsa-miR-210-3p	COL2A1	0.301686	0.183828	1.00858	0.986423	0.682853	0.0357473	NA	NA	NA	NA
hsa-miR-210-3p	IGFBP5	0.299727	0.186833	1.29452	0.177581	0.682853	0.0357473	NA	NA	NA	NA
hsa-miR-210-3p	VEGFA	0.235636	0.303822	1.17721	0.27403	0.682853	0.0357473	NA	NA	NA	NA
hsa-miR-210-3p	SMAD2	0.22833	0.319493	1.18533	0.0540127	0.682853	0.0357473	NA	NA	NA	NA
hsa-miR-210-3p	CHRDL1	0.225335	0.326055	1.49435	0.292121	0.682853	0.0357473	NA	NA	NA	NA
hsa-miR-210-3p	SMAD4	0.162357	0.481967	1.08483	0.392856	0.682853	0.0357473	NA	NA	NA	NA
hsa-miR-210-3p	BCL2	0.143891	0.533767	1.1389	0.259904	0.682853	0.0357473	NA	NA	NA	NA
hsa-miR-210-3p	ADAMTS5	0.126978	0.58336	1.36417	0.016705	0.682853	0.0357473	NA	NA	HITS-CLIP	NA
hsa-miR-210-3p	ACVR2B	0.116498	0.615043	0.958292	0.798923	0.682853	0.0357473	NA	NA	NA	NA
hsa-miR-210-3p	MMP13	0.0378153	0.870725	0.895583	0.834042	0.682853	0.0357473	NA	NA	NA	NA
hsa-miR-210-3p	SOX9	0.0336473	0.884877	0.862275	0.223147	0.682853	0.0357473	NA	NA	NA	NA
hsa-miR-210-3p	SIRT1	0.0215661	0.926073	0.945232	0.703658	0.682853	0.0357473	NA	NA	NA	NA
hsa-miR-210-3p	INPP5D	-0.0229041	0.9215	0.933643	0.71454	0.682853	0.0357473	NA	NA	NA	NA
hsa-miR-210-3p	CEBPB	-0.0395885	0.864716	0.939753	0.736829	0.682853	0.0357473	NA	NA	NA	NA
hsa-miR-210-3p	TGFB1	-0.0739307	0.750118	0.887273	0.585925	0.682853	0.0357473	NA	NA	NA	NA
hsa-miR-210-3p	IL1B	-0.0997157	0.66716	0.864069	0.884336	0.682853	0.0357473	NA	NA	NA	NA
hsa-miR-210-3p	GAS5	-0.173476	0.45204	1.0647	0.746685	0.682853	0.0357473	NA	NA	NA	NA
hsa-miR-215-5p	INPP5D	0.347568	0.122632	0.933643	0.71454	2.15224	0.00132062	NA	NA	NA	NA
hsa-miR-215-5p	CHRDL1	0.316707	0.161879	1.49435	0.292121	2.15224	0.00132062	NA	NA	NA	NA
hsa-miR-215-5p	SOX9	0.133485	0.564048	0.862275	0.223147	2.15224	0.00132062	NA	NA	NA	NA
hsa-miR-215-5p	ACVR2B	0.125465	0.58789	0.958292	0.798923	2.15224	0.00132062	-0.12	NA	NA	Luciferase reporter assay//Western blot
hsa-miR-215-5p	GAS5	0.108036	0.641119	1.0647	0.746685	2.15224	0.00132062	NA	NA	NA	NA
hsa-miR-215-5p	SMAD4	0.0915211	0.693174	1.08483	0.392856	2.15224	0.00132062	NA	NA	NA	NA
hsa-miR-215-5p	BCL2	0.080845	0.727567	1.1389	0.259904	2.15224	0.00132062	NA	NA	NA	Microarray
hsa-miR-215-5p	COL2A1	0.0764038	0.742028	1.00858	0.986423	2.15224	0.00132062	NA	NA	NA	NA
hsa-miR-215-5p	IL1B	0.0739263	0.750132	0.864069	0.884336	2.15224	0.00132062	NA	NA	NA	NA
hsa-miR-215-5p	IGFBP5	0.0690192	0.766258	1.29452	0.177581	2.15224	0.00132062	NA	NA	NA	NA
hsa-miR-215-5p	SIRT1	0.0530077	0.819493	0.945232	0.703658	2.15224	0.00132062	NA	NA	NA	Microarray
hsa-miR-215-5p	SMAD2	-0.039661	0.86447	1.18533	0.0540127	2.15224	0.00132062	NA	NA	NA	NA
hsa-miR-215-5p	CEBPB	-0.149424	0.517981	0.939753	0.736829	2.15224	0.00132062	NA	NA	NA	NA
hsa-miR-215-5p	MMP13	-0.168961	0.464074	0.895583	0.834042	2.15224	0.00132062	NA	NA	NA	NA
hsa-miR-215-5p	VEGFA	-0.196579	0.393075	1.17721	0.27403	2.15224	0.00132062	NA	NA	NA	NA
hsa-miR-215-5p	ADAMTS5	-0.24266	0.289209	1.36417	0.016705	2.15224	0.00132062	NA	NA	NA	NA
hsa-miR-215-5p	TGFB1	-0.42813	0.052842	0.887273	0.585925	2.15224	0.00132062	NA	NA	NA	NA
hsa-miR-215-5p	GDF5	-0.521897	0.0152372	1.23117	0.309402	2.15224	0.00132062	NA	NA	NA	NA
hsa-miR-21-5p	MMP13	0.608891	0.00339563	0.895583	0.834042	2.83517	3.38031e-06	NA	NA	NA	NA
hsa-miR-21-5p	IL1B	0.55503	0.00901012	0.864069	0.884336	2.83517	3.38031e-06	NA	NA	HITS-CLIP	Luciferase reporter assay//Microarray//qRT-PCR
hsa-miR-21-5p	CEBPB	0.447384	0.0419984	0.939753	0.736829	2.83517	3.38031e-06	NA	NA	NA	NA
hsa-miR-21-5p	INPP5D	0.419385	0.0584242	0.933643	0.71454	2.83517	3.38031e-06	NA	NA	NA	NA
hsa-miR-21-5p	GAS5	0.274446	0.228611	1.0647	0.746685	2.83517	3.38031e-06	NA	NA	NA	qRT-PCR//Western blot
hsa-miR-21-5p	ADAMTS5	0.225581	0.325513	1.36417	0.016705	2.83517	3.38031e-06	NA	NA	NA	NA
hsa-miR-21-5p	TGFB1	-0.0448424	0.846953	0.887273	0.585925	2.83517	3.38031e-06	NA	NA	NA	Microarray
hsa-miR-21-5p	GDF5	-0.118531	0.608842	1.23117	0.309402	2.83517	3.38031e-06	NA	NA	NA	Luciferase reporter assay//qRT-PCR//Western blot
hsa-miR-21-5p	CHRDL1	-0.142401	0.538056	1.49435	0.292121	2.83517	3.38031e-06	NA	NA	NA	NA
hsa-miR-21-5p	ACVR2B	-0.167956	0.466776	0.958292	0.798923	2.83517	3.38031e-06	NA	NA	NA	NA
hsa-miR-21-5p	SMAD4	-0.25703	0.260689	1.08483	0.392856	2.83517	3.38031e-06	NA	NA	NA	NA
hsa-miR-21-5p	VEGFA	-0.313425	0.166512	1.17721	0.27403	2.83517	3.38031e-06	NA	NA	qPCR	qRT-PCR
hsa-miR-21-5p	COL2A1	-0.409092	0.0655576	1.00858	0.986423	2.83517	3.38031e-06	NA	NA	NA	NA
hsa-miR-21-5p	SOX9	-0.449553	0.0408946	0.862275	0.223147	2.83517	3.38031e-06	NA	NA	PAR-CLIP	NA
hsa-miR-21-5p	SMAD2	-0.473621	0.0300996	1.18533	0.0540127	2.83517	3.38031e-06	NA	NA	NA	NA
hsa-miR-21-5p	IGFBP5	-0.507271	0.0189152	1.29452	0.177581	2.83517	3.38031e-06	NA	NA	HITS-CLIP	NA
hsa-miR-21-5p	SIRT1	-0.531738	0.0131054	0.945232	0.703658	2.83517	3.38031e-06	NA	NA	NA	NA
hsa-miR-21-5p	BCL2	-0.606747	0.00354167	1.1389	0.259904	2.83517	3.38031e-06	-0.111	NA	NA	Western blot
hsa-miR-221-3p	MMP13	0.362962	0.105844	0.895583	0.834042	1.30368	0.036046	NA	NA	NA	NA
hsa-miR-221-3p	IL1B	0.292011	0.198989	0.864069	0.884336	1.30368	0.036046	NA	NA	NA	NA
hsa-miR-221-3p	INPP5D	0.274681	0.228197	0.933643	0.71454	1.30368	0.036046	NA	NA	NA	NA
hsa-miR-221-3p	CHRDL1	0.253647	0.267236	1.49435	0.292121	1.30368	0.036046	NA	NA	NA	NA
hsa-miR-221-3p	CEBPB	0.203845	0.37546	0.939753	0.736829	1.30368	0.036046	NA	NA	NA	NA
hsa-miR-221-3p	COL2A1	0.186997	0.41699	1.00858	0.986423	1.30368	0.036046	NA	NA	NA	NA
hsa-miR-221-3p	GDF5	0.175448	0.446836	1.23117	0.309402	1.30368	0.036046	NA	NA	NA	NA
hsa-miR-221-3p	ADAMTS5	0.170735	0.459326	1.36417	0.016705	1.30368	0.036046	NA	NA	NA	NA
hsa-miR-221-3p	ACVR2B	0.144957	0.530707	0.958292	0.798923	1.30368	0.036046	NA	NA	NA	Microarray
hsa-miR-221-3p	SMAD4	0.0927743	0.689174	1.08483	0.392856	1.30368	0.036046	NA	NA	NA	NA
hsa-miR-221-3p	IGFBP5	0.0721624	0.755918	1.29452	0.177581	1.30368	0.036046	NA	NA	NA	NA
hsa-miR-221-3p	SMAD2	0.0486071	0.834269	1.18533	0.0540127	1.30368	0.036046	NA	NA	NA	NA
hsa-miR-221-3p	VEGFA	-0.00338612	0.988378	1.17721	0.27403	1.30368	0.036046	NA	NA	NA	NA
hsa-miR-221-3p	BCL2	-0.132668	0.566457	1.1389	0.259904	1.30368	0.036046	NA	NA	NA	NA
hsa-miR-221-3p	SOX9	-0.142124	0.538854	0.862275	0.223147	1.30368	0.036046	NA	NA	NA	NA
hsa-miR-221-3p	GAS5	-0.170106	0.461007	1.0647	0.746685	1.30368	0.036046	NA	NA	NA	NA
hsa-miR-221-3p	TGFB1	-0.245394	0.28364	0.887273	0.585925	1.30368	0.036046	NA	NA	NA	NA
hsa-miR-221-3p	SIRT1	-0.259632	0.255725	0.945232	0.703658	1.30368	0.036046	NA	NA	NA	Luciferase reporter assay//QRTPCR//Western blot
hsa-miR-221-5p	INPP5D	0.293947	0.195891	0.933643	0.71454	1.70029	0.0102256	NA	NA	NA	NA
hsa-miR-221-5p	ACVR2B	0.136084	0.556415	0.958292	0.798923	1.70029	0.0102256	NA	NA	NA	NA
hsa-miR-221-5p	IL1B	0.118829	0.607935	0.864069	0.884336	1.70029	0.0102256	NA	NA	NA	NA
hsa-miR-221-5p	GAS5	0.0518392	0.823411	1.0647	0.746685	1.70029	0.0102256	NA	NA	NA	NA
hsa-miR-221-5p	SMAD4	0.0390912	0.8664	1.08483	0.392856	1.70029	0.0102256	NA	NA	HITS-CLIP	NA
hsa-miR-221-5p	MMP13	0.00273497	0.990613	0.895583	0.834042	1.70029	0.0102256	NA	NA	NA	NA
hsa-miR-221-5p	SOX9	-0.00290337	0.990035	0.862275	0.223147	1.70029	0.0102256	NA	NA	NA	NA
hsa-miR-221-5p	CHRDL1	-0.0228281	0.921759	1.49435	0.292121	1.70029	0.0102256	NA	NA	NA	NA
hsa-miR-221-5p	BCL2	-0.0659487	0.776396	1.1389	0.259904	1.70029	0.0102256	NA	NA	NA	NA
hsa-miR-221-5p	CEBPB	-0.0925268	0.689963	0.939753	0.736829	1.70029	0.0102256	NA	NA	NA	NA
hsa-miR-221-5p	SIRT1	-0.110312	0.634063	0.945232	0.703658	1.70029	0.0102256	NA	NA	NA	NA
hsa-miR-221-5p	TGFB1	-0.162669	0.481113	0.887273	0.585925	1.70029	0.0102256	NA	NA	NA	NA
hsa-miR-221-5p	ADAMTS5	-0.192307	0.403641	1.36417	0.016705	1.70029	0.0102256	NA	NA	NA	NA
hsa-miR-221-5p	COL2A1	-0.199238	0.386576	1.00858	0.986423	1.70029	0.0102256	NA	NA	NA	NA
hsa-miR-221-5p	SMAD2	-0.233117	0.309172	1.18533	0.0540127	1.70029	0.0102256	NA	NA	NA	NA
hsa-miR-221-5p	IGFBP5	-0.236251	0.302525	1.29452	0.177581	1.70029	0.0102256	NA	NA	HITS-CLIP	NA
hsa-miR-221-5p	GDF5	-0.395047	0.0763307	1.23117	0.309402	1.70029	0.0102256	NA	NA	NA	NA
hsa-miR-221-5p	VEGFA	-0.479903	0.0276903	1.17721	0.27403	1.70029	0.0102256	NA	NA	NA	NA
hsa-miR-222-3p	ADAMTS5	0.361799	0.107051	1.36417	0.016705	1.49534	0.00132062	NA	0.565	NA	NA
hsa-miR-222-3p	MMP13	0.349952	0.119915	0.895583	0.834042	1.49534	0.00132062	NA	NA	NA	NA
hsa-miR-222-3p	SMAD2	0.295785	0.192978	1.18533	0.0540127	1.49534	0.00132062	NA	NA	NA	NA
hsa-miR-222-3p	IL1B	0.22461	0.327655	0.864069	0.884336	1.49534	0.00132062	NA	NA	NA	NA
hsa-miR-222-3p	ACVR2B	0.207062	0.367806	0.958292	0.798923	1.49534	0.00132062	NA	NA	HITS-CLIP	NA
hsa-miR-222-3p	INPP5D	0.206204	0.369839	0.933643	0.71454	1.49534	0.00132062	NA	NA	NA	NA
hsa-miR-222-3p	SMAD4	0.149685	0.517241	1.08483	0.392856	1.49534	0.00132062	NA	0.51	NA	NA
hsa-miR-222-3p	IGFBP5	0.0671824	0.772319	1.29452	0.177581	1.49534	0.00132062	NA	NA	NA	NA
hsa-miR-222-3p	CHRDL1	0.0605893	0.794175	1.49435	0.292121	1.49534	0.00132062	NA	0.481	NA	NA
hsa-miR-222-3p	COL2A1	0.0401423	0.86284	1.00858	0.986423	1.49534	0.00132062	NA	NA	NA	NA
hsa-miR-222-3p	SIRT1	0.029915	0.897578	0.945232	0.703658	1.49534	0.00132062	NA	NA	NA	NA
hsa-miR-222-3p	VEGFA	0.00611717	0.979005	1.17721	0.27403	1.49534	0.00132062	NA	NA	NA	NA
hsa-miR-222-3p	SOX9	0.00248475	0.991471	0.862275	0.223147	1.49534	0.00132062	NA	NA	NA	NA
hsa-miR-222-3p	GDF5	-0.0325644	0.888559	1.23117	0.309402	1.49534	0.00132062	NA	NA	NA	NA
hsa-miR-222-3p	CEBPB	-0.0404663	0.861743	0.939753	0.736829	1.49534	0.00132062	NA	NA	NA	NA
hsa-miR-222-3p	TGFB1	-0.0591151	0.799083	0.887273	0.585925	1.49534	0.00132062	NA	NA	NA	NA
hsa-miR-222-3p	BCL2	-0.0795124	0.731897	1.1389	0.259904	1.49534	0.00132062	NA	NA	NA	NA
hsa-miR-222-3p	GAS5	-0.439806	0.0460379	1.0647	0.746685	1.49534	0.00132062	NA	NA	NA	NA
hsa-miR-223-5p	SOX9	0.261847	0.251545	0.862275	0.223147	2.28137	0.0107995	NA	NA	NA	NA
hsa-miR-223-5p	SIRT1	0.241351	0.291899	0.945232	0.703658	2.28137	0.0107995	NA	NA	NA	NA
hsa-miR-223-5p	ACVR2B	0.237936	0.298989	0.958292	0.798923	2.28137	0.0107995	NA	NA	NA	NA
hsa-miR-223-5p	SMAD4	0.223376	0.330389	1.08483	0.392856	2.28137	0.0107995	NA	NA	NA	NA
hsa-miR-223-5p	BCL2	0.175142	0.447641	1.1389	0.259904	2.28137	0.0107995	NA	NA	NA	NA
hsa-miR-223-5p	INPP5D	0.14285	0.536763	0.933643	0.71454	2.28137	0.0107995	NA	NA	NA	NA
hsa-miR-223-5p	IGFBP5	0.0506116	0.827532	1.29452	0.177581	2.28137	0.0107995	NA	NA	NA	NA
hsa-miR-223-5p	IL1B	-0.00546659	0.981238	0.864069	0.884336	2.28137	0.0107995	NA	NA	NA	NA
hsa-miR-223-5p	CHRDL1	-0.00935597	0.967894	1.49435	0.292121	2.28137	0.0107995	NA	NA	NA	NA
hsa-miR-223-5p	GAS5	-0.0206607	0.929169	1.0647	0.746685	2.28137	0.0107995	NA	NA	NA	NA
hsa-miR-223-5p	TGFB1	-0.0540065	0.816147	0.887273	0.585925	2.28137	0.0107995	NA	NA	NA	NA
hsa-miR-223-5p	ADAMTS5	-0.12434	0.59127	1.36417	0.016705	2.28137	0.0107995	NA	0.664	NA	NA
hsa-miR-223-5p	SMAD2	-0.128117	0.579958	1.18533	0.0540127	2.28137	0.0107995	NA	0.71	NA	NA
hsa-miR-223-5p	COL2A1	-0.150757	0.514211	1.00858	0.986423	2.28137	0.0107995	NA	NA	NA	NA
hsa-miR-223-5p	MMP13	-0.15397	0.505177	0.895583	0.834042	2.28137	0.0107995	NA	NA	NA	NA
hsa-miR-223-5p	VEGFA	-0.241318	0.291967	1.17721	0.27403	2.28137	0.0107995	NA	NA	NA	NA
hsa-miR-223-5p	CEBPB	-0.249537	0.275329	0.939753	0.736829	2.28137	0.0107995	NA	NA	NA	NA
hsa-miR-223-5p	GDF5	-0.491686	0.023585	1.23117	0.309402	2.28137	0.0107995	NA	NA	NA	NA
hsa-miR-23a-3p	GAS5	0.395498	0.0759654	1.0647	0.746685	1.48288	0.00380532	NA	NA	NA	NA
hsa-miR-23a-3p	COL2A1	0.203762	0.375659	1.00858	0.986423	1.48288	0.00380532	NA	NA	NA	NA
hsa-miR-23a-3p	CEBPB	0.192305	0.403647	0.939753	0.736829	1.48288	0.00380532	NA	NA	NA	NA
hsa-miR-23a-3p	BCL2	0.0857321	0.711756	1.1389	0.259904	1.48288	0.00380532	-0.185	0.726	NA	NA
hsa-miR-23a-3p	GDF5	0.0238901	0.918131	1.23117	0.309402	1.48288	0.00380532	NA	NA	NA	NA
hsa-miR-23a-3p	IL1B	0.0175071	0.93996	0.864069	0.884336	1.48288	0.00380532	NA	NA	NA	NA
hsa-miR-23a-3p	SOX9	-0.0289366	0.900911	0.862275	0.223147	1.48288	0.00380532	NA	0.495	NA	NA
hsa-miR-23a-3p	CHRDL1	-0.07787	0.737245	1.49435	0.292121	1.48288	0.00380532	NA	NA	NA	NA
hsa-miR-23a-3p	MMP13	-0.0918486	0.692128	0.895583	0.834042	1.48288	0.00380532	NA	NA	NA	NA
hsa-miR-23a-3p	VEGFA	-0.133949	0.562681	1.17721	0.27403	1.48288	0.00380532	NA	0.668	NA	NA
hsa-miR-23a-3p	INPP5D	-0.14814	0.521623	0.933643	0.71454	1.48288	0.00380532	NA	NA	NA	NA
hsa-miR-23a-3p	ACVR2B	-0.247152	0.280093	0.958292	0.798923	1.48288	0.00380532	-0.095	NA	HITS-CLIP	NA
hsa-miR-23a-3p	SMAD4	-0.318136	0.15989	1.08483	0.392856	1.48288	0.00380532	NA	0.809	HITS-CLIP	NA
hsa-miR-23a-3p	SMAD2	-0.395626	0.0758617	1.18533	0.0540127	1.48288	0.00380532	NA	0.451	NA	NA
hsa-miR-23a-3p	SIRT1	-0.399657	0.0726582	0.945232	0.703658	1.48288	0.00380532	NA	0.497	NA	NA
hsa-miR-23a-3p	IGFBP5	-0.406321	0.0675859	1.29452	0.177581	1.48288	0.00380532	NA	NA	NA	NA
hsa-miR-23a-3p	ADAMTS5	-0.557398	0.00866052	1.36417	0.016705	1.48288	0.00380532	-0.108	0.74	NA	NA
hsa-miR-23a-3p	TGFB1	-0.565525	0.00754424	0.887273	0.585925	1.48288	0.00380532	NA	NA	NA	NA
hsa-miR-23b-5p	SMAD2	0.637216	0.00189111	1.18533	0.0540127	0.689568	0.00146123	NA	NA	NA	NA
hsa-miR-23b-5p	IGFBP5	0.517007	0.0163963	1.29452	0.177581	0.689568	0.00146123	NA	NA	NA	NA
hsa-miR-23b-5p	SIRT1	0.516113	0.0166156	0.945232	0.703658	0.689568	0.00146123	NA	NA	NA	NA
hsa-miR-23b-5p	SMAD4	0.442893	0.0443576	1.08483	0.392856	0.689568	0.00146123	NA	NA	NA	NA
hsa-miR-23b-5p	CHRDL1	0.294428	0.195125	1.49435	0.292121	0.689568	0.00146123	NA	NA	NA	NA
hsa-miR-23b-5p	BCL2	0.288285	0.205046	1.1389	0.259904	0.689568	0.00146123	NA	NA	NA	NA
hsa-miR-23b-5p	ACVR2B	0.2769	0.224308	0.958292	0.798923	0.689568	0.00146123	NA	NA	NA	NA
hsa-miR-23b-5p	SOX9	0.256286	0.26212	0.862275	0.223147	0.689568	0.00146123	NA	NA	NA	NA
hsa-miR-23b-5p	ADAMTS5	0.165304	0.473941	1.36417	0.016705	0.689568	0.00146123	NA	NA	NA	NA
hsa-miR-23b-5p	COL2A1	0.144096	0.533179	1.00858	0.986423	0.689568	0.00146123	NA	0.487	NA	NA
hsa-miR-23b-5p	INPP5D	0.125711	0.587153	0.933643	0.71454	0.689568	0.00146123	NA	NA	NA	NA
hsa-miR-23b-5p	VEGFA	0.0563018	0.80847	1.17721	0.27403	0.689568	0.00146123	NA	NA	NA	NA
hsa-miR-23b-5p	TGFB1	0.0402004	0.862643	0.887273	0.585925	0.689568	0.00146123	NA	NA	NA	NA
hsa-miR-23b-5p	GDF5	-0.28018	0.218641	1.23117	0.309402	0.689568	0.00146123	NA	NA	NA	NA
hsa-miR-23b-5p	IL1B	-0.281049	0.217156	0.864069	0.884336	0.689568	0.00146123	NA	NA	NA	NA
hsa-miR-23b-5p	MMP13	-0.289195	0.203556	0.895583	0.834042	0.689568	0.00146123	NA	NA	NA	NA
hsa-miR-23b-5p	GAS5	-0.3374	0.134719	1.0647	0.746685	0.689568	0.00146123	NA	NA	NA	NA
hsa-miR-23b-5p	CEBPB	-0.411449	0.0638683	0.939753	0.736829	0.689568	0.00146123	NA	NA	NA	NA
hsa-miR-24-2-5p	SOX9	0.368907	0.0998317	0.862275	0.223147	1.32	0.00179221	NA	NA	NA	NA
hsa-miR-24-2-5p	SIRT1	0.32643	0.148682	0.945232	0.703658	1.32	0.00179221	NA	NA	NA	NA
hsa-miR-24-2-5p	COL2A1	0.311828	0.168799	1.00858	0.986423	1.32	0.00179221	NA	NA	NA	NA
hsa-miR-24-2-5p	CHRDL1	0.3002	0.186104	1.49435	0.292121	1.32	0.00179221	NA	NA	NA	NA
hsa-miR-24-2-5p	SMAD4	0.300065	0.186311	1.08483	0.392856	1.32	0.00179221	NA	NA	NA	NA
hsa-miR-24-2-5p	ADAMTS5	0.274003	0.229393	1.36417	0.016705	1.32	0.00179221	NA	NA	HITS-CLIP	NA
hsa-miR-24-2-5p	INPP5D	0.253356	0.267805	0.933643	0.71454	1.32	0.00179221	NA	NA	NA	NA
hsa-miR-24-2-5p	ACVR2B	0.243923	0.286628	0.958292	0.798923	1.32	0.00179221	NA	NA	HITS-CLIP	NA
hsa-miR-24-2-5p	SMAD2	0.242004	0.290555	1.18533	0.0540127	1.32	0.00179221	NA	NA	NA	NA
hsa-miR-24-2-5p	VEGFA	0.237183	0.300565	1.17721	0.27403	1.32	0.00179221	NA	NA	NA	NA
hsa-miR-24-2-5p	IGFBP5	0.229453	0.317053	1.29452	0.177581	1.32	0.00179221	NA	NA	NA	NA
hsa-miR-24-2-5p	BCL2	0.180559	0.433493	1.1389	0.259904	1.32	0.00179221	NA	NA	NA	Luciferase reporter assay
hsa-miR-24-2-5p	MMP13	0.16285	0.480619	0.895583	0.834042	1.32	0.00179221	NA	NA	NA	NA
hsa-miR-24-2-5p	TGFB1	0.0471077	0.839317	0.887273	0.585925	1.32	0.00179221	NA	NA	NA	NA
hsa-miR-24-2-5p	GDF5	-0.0616372	0.790691	1.23117	0.309402	1.32	0.00179221	NA	NA	NA	NA
hsa-miR-24-2-5p	CEBPB	-0.0761019	0.743014	0.939753	0.736829	1.32	0.00179221	NA	NA	NA	NA
hsa-miR-24-2-5p	IL1B	-0.241845	0.290881	0.864069	0.884336	1.32	0.00179221	NA	NA	NA	NA
hsa-miR-24-2-5p	GAS5	-0.382751	0.0868046	1.0647	0.746685	1.32	0.00179221	NA	NA	NA	NA
hsa-miR-25-3p	TGFB1	0.265282	0.245152	0.887273	0.585925	1.51199	0.0134649	NA	NA	NA	NA
hsa-miR-25-3p	GAS5	0.200066	0.384563	1.0647	0.746685	1.51199	0.0134649	NA	NA	NA	NA
hsa-miR-25-3p	IL1B	0.0609876	0.792851	0.864069	0.884336	1.51199	0.0134649	NA	0.539	NA	NA
hsa-miR-25-3p	SOX9	0.0211356	0.927545	0.862275	0.223147	1.51199	0.0134649	NA	NA	NA	NA
hsa-miR-25-3p	SIRT1	-0.00442366	0.984817	0.945232	0.703658	1.51199	0.0134649	NA	NA	NA	NA
hsa-miR-25-3p	CEBPB	-0.0210877	0.927709	0.939753	0.736829	1.51199	0.0134649	NA	NA	HITS-CLIP	NA
hsa-miR-25-3p	INPP5D	-0.036585	0.874898	0.933643	0.71454	1.51199	0.0134649	NA	0.619	NA	NA
hsa-miR-25-3p	BCL2	-0.0506619	0.827363	1.1389	0.259904	1.51199	0.0134649	NA	0.633	NA	NA
hsa-miR-25-3p	CHRDL1	-0.0591184	0.799072	1.49435	0.292121	1.51199	0.0134649	NA	0.622	NA	NA
hsa-miR-25-3p	MMP13	-0.143117	0.535994	0.895583	0.834042	1.51199	0.0134649	NA	0.457	NA	NA
hsa-miR-25-3p	ADAMTS5	-0.197853	0.389952	1.36417	0.016705	1.51199	0.0134649	NA	0.781	NA	NA
hsa-miR-25-3p	SMAD2	-0.212863	0.354234	1.18533	0.0540127	1.51199	0.0134649	NA	0.649	HITS-CLIP	NA
hsa-miR-25-3p	ACVR2B	-0.269237	0.23792	0.958292	0.798923	1.51199	0.0134649	NA	NA	NA	NA
hsa-miR-25-3p	COL2A1	-0.287891	0.205693	1.00858	0.986423	1.51199	0.0134649	NA	NA	NA	NA
hsa-miR-25-3p	SMAD4	-0.309909	0.171575	1.08483	0.392856	1.51199	0.0134649	NA	0.537	NA	NA
hsa-miR-25-3p	VEGFA	-0.314007	0.165683	1.17721	0.27403	1.51199	0.0134649	NA	0.533	NA	NA
hsa-miR-25-3p	IGFBP5	-0.314212	0.165392	1.29452	0.177581	1.51199	0.0134649	NA	0.489	NA	NA
hsa-miR-25-3p	GDF5	-0.365499	0.103247	1.23117	0.309402	1.51199	0.0134649	NA	NA	NA	NA
hsa-miR-26b-5p	GAS5	0.565374	0.00756388	1.0647	0.746685	1.81215	0.0130519	NA	NA	NA	NA
hsa-miR-26b-5p	CEBPB	0.397578	0.0742976	0.939753	0.736829	1.81215	0.0130519	NA	NA	NA	NA
hsa-miR-26b-5p	IL1B	0.313657	0.166181	0.864069	0.884336	1.81215	0.0130519	NA	NA	NA	NA
hsa-miR-26b-5p	MMP13	0.0761996	0.742695	0.895583	0.834042	1.81215	0.0130519	NA	NA	NA	NA
hsa-miR-26b-5p	TGFB1	0.027502	0.905803	0.887273	0.585925	1.81215	0.0130519	NA	NA	NA	NA
hsa-miR-26b-5p	INPP5D	0.00823675	0.971733	0.933643	0.71454	1.81215	0.0130519	NA	NA	Microarrays	Microarray
hsa-miR-26b-5p	CHRDL1	-0.0640825	0.782575	1.49435	0.292121	1.81215	0.0130519	NA	NA	NA	NA
hsa-miR-26b-5p	GDF5	-0.1208	0.601951	1.23117	0.309402	1.81215	0.0130519	NA	NA	NA	NA
hsa-miR-26b-5p	BCL2	-0.23565	0.303792	1.1389	0.259904	1.81215	0.0130519	NA	NA	NA	NA
hsa-miR-26b-5p	COL2A1	-0.24927	0.27586	1.00858	0.986423	1.81215	0.0130519	NA	NA	NA	NA
hsa-miR-26b-5p	ACVR2B	-0.269117	0.238137	0.958292	0.798923	1.81215	0.0130519	-0.014	NA	NA	NA
hsa-miR-26b-5p	SMAD4	-0.272385	0.232266	1.08483	0.392856	1.81215	0.0130519	NA	0.718	Western Blot	NA
hsa-miR-26b-5p	VEGFA	-0.331639	0.141931	1.17721	0.27403	1.81215	0.0130519	NA	NA	NA	NA
hsa-miR-26b-5p	ADAMTS5	-0.356205	0.112994	1.36417	0.016705	1.81215	0.0130519	NA	0.735	HITS-CLIP	NA
hsa-miR-26b-5p	SOX9	-0.392223	0.078648	0.862275	0.223147	1.81215	0.0130519	NA	NA	NA	NA
hsa-miR-26b-5p	IGFBP5	-0.474042	0.0299332	1.29452	0.177581	1.81215	0.0130519	NA	NA	NA	NA
hsa-miR-26b-5p	SMAD2	-0.535489	0.0123595	1.18533	0.0540127	1.81215	0.0130519	NA	0.691	NA	NA
hsa-miR-26b-5p	SIRT1	-0.563744	0.00777815	0.945232	0.703658	1.81215	0.0130519	NA	NA	NA	NA
hsa-miR-27a-3p	MMP13	0.460709	0.0355688	0.895583	0.834042	1.80607	0.000496013	-0.131	0.723	NA	qRT-PCR
hsa-miR-27a-3p	CEBPB	0.332771	0.140492	0.939753	0.736829	1.80607	0.000496013	NA	NA	NA	NA
hsa-miR-27a-3p	IL1B	0.293693	0.196294	0.864069	0.884336	1.80607	0.000496013	NA	NA	NA	NA
hsa-miR-27a-3p	INPP5D	0.179315	0.43672	0.933643	0.71454	1.80607	0.000496013	NA	0.464	NA	NA
hsa-miR-27a-3p	ADAMTS5	0.173559	0.45182	1.36417	0.016705	1.80607	0.000496013	-0.02	0.794	NA	HITS-CLIP
hsa-miR-27a-3p	GDF5	0.0622281	0.788728	1.23117	0.309402	1.80607	0.000496013	NA	NA	NA	NA
hsa-miR-27a-3p	SMAD2	-0.0357495	0.877735	1.18533	0.0540127	1.80607	0.000496013	-0.095	0.471	NA	HITS-CLIP
hsa-miR-27a-3p	VEGFA	-0.052596	0.820873	1.17721	0.27403	1.80607	0.000496013	NA	NA	NA	NA
hsa-miR-27a-3p	ACVR2B	-0.0648592	0.780002	0.958292	0.798923	1.80607	0.000496013	-0.01	NA	HITS-CLIP	NA
hsa-miR-27a-3p	COL2A1	-0.0654197	0.778147	1.00858	0.986423	1.80607	0.000496013	NA	NA	NA	NA
hsa-miR-27a-3p	SMAD4	-0.0817588	0.724603	1.08483	0.392856	1.80607	0.000496013	NA	0.805	NA	HITS-CLIP
hsa-miR-27a-3p	GAS5	-0.12566	0.587306	1.0647	0.746685	1.80607	0.000496013	NA	NA	NA	NA
hsa-miR-27a-3p	CHRDL1	-0.128591	0.578546	1.49435	0.292121	1.80607	0.000496013	NA	0.626	NA	NA
hsa-miR-27a-3p	SOX9	-0.159188	0.490674	0.862275	0.223147	1.80607	0.000496013	NA	0.467	NA	NA
hsa-miR-27a-3p	TGFB1	-0.168019	0.466604	0.887273	0.585925	1.80607	0.000496013	NA	NA	HITS-CLIP	NA
hsa-miR-27a-3p	BCL2	-0.270284	0.23603	1.1389	0.259904	1.80607	0.000496013	NA	NA	NA	NA
hsa-miR-27a-3p	SIRT1	-0.301768	0.183702	0.945232	0.703658	1.80607	0.000496013	NA	0.621	HITS-CLIP	NA
hsa-miR-27a-3p	IGFBP5	-0.305127	0.17863	1.29452	0.177581	1.80607	0.000496013	NA	0.53	HITS-CLIP	NA
hsa-miR-27a-5p	INPP5D	0.602931	0.00381461	0.933643	0.71454	1.43637	0.00549097	NA	0.452	NA	NA
hsa-miR-27a-5p	IL1B	0.441203	0.0452716	0.864069	0.884336	1.43637	0.00549097	NA	0.461	NA	NA
hsa-miR-27a-5p	MMP13	0.376761	0.0922771	0.895583	0.834042	1.43637	0.00549097	NA	NA	NA	NA
hsa-miR-27a-5p	CEBPB	0.271636	0.233603	0.939753	0.736829	1.43637	0.00549097	NA	NA	NA	NA
hsa-miR-27a-5p	ADAMTS5	0.219736	0.338534	1.36417	0.016705	1.43637	0.00549097	NA	0.457	NA	NA
hsa-miR-27a-5p	SMAD4	0.15439	0.504001	1.08483	0.392856	1.43637	0.00549097	NA	0.775	PAR-CLIP	NA
hsa-miR-27a-5p	CHRDL1	0.150569	0.514741	1.49435	0.292121	1.43637	0.00549097	NA	NA	NA	NA
hsa-miR-27a-5p	GAS5	0.142659	0.537312	1.0647	0.746685	1.43637	0.00549097	NA	NA	NA	NA
hsa-miR-27a-5p	ACVR2B	0.100078	0.666018	0.958292	0.798923	1.43637	0.00549097	NA	NA	NA	NA
hsa-miR-27a-5p	SMAD2	0.0931732	0.687902	1.18533	0.0540127	1.43637	0.00549097	NA	0.572	NA	NA
hsa-miR-27a-5p	IGFBP5	-0.0144028	0.950592	1.29452	0.177581	1.43637	0.00549097	NA	0.469	NA	NA
hsa-miR-27a-5p	COL2A1	-0.154374	0.504046	1.00858	0.986423	1.43637	0.00549097	NA	NA	NA	NA
hsa-miR-27a-5p	TGFB1	-0.185329	0.421234	0.887273	0.585925	1.43637	0.00549097	NA	NA	NA	NA
hsa-miR-27a-5p	SIRT1	-0.305596	0.17793	0.945232	0.703658	1.43637	0.00549097	NA	NA	NA	NA
hsa-miR-27a-5p	GDF5	-0.346868	0.123439	1.23117	0.309402	1.43637	0.00549097	NA	NA	NA	NA
hsa-miR-27a-5p	SOX9	-0.359011	0.109984	0.862275	0.223147	1.43637	0.00549097	NA	NA	NA	NA
hsa-miR-27a-5p	VEGFA	-0.378537	0.090628	1.17721	0.27403	1.43637	0.00549097	NA	NA	NA	NA
hsa-miR-27a-5p	BCL2	-0.456523	0.0374991	1.1389	0.259904	1.43637	0.00549097	NA	0.691	NA	NA
hsa-miR-29b-3p	GAS5	0.316729	0.161848	1.0647	0.746685	2.36561	0.000468	NA	NA	NA	NA
hsa-miR-29b-3p	CHRDL1	0.205943	0.370457	1.49435	0.292121	2.36561	0.000468	NA	NA	NA	NA
hsa-miR-29b-3p	BCL2	0.122429	0.597025	1.1389	0.259904	2.36561	0.000468	NA	NA	Western Blot	Luciferase reporter assay//qRT-PCR//Western blot
hsa-miR-29b-3p	ACVR2B	0.118906	0.607702	0.958292	0.798923	2.36561	0.000468	NA	NA	HITS-CLIP	NA
hsa-miR-29b-3p	CEBPB	0.0758203	0.743935	0.939753	0.736829	2.36561	0.000468	NA	NA	NA	NA
hsa-miR-29b-3p	SOX9	0.0616218	0.790742	0.862275	0.223147	2.36561	0.000468	NA	NA	NA	NA
hsa-miR-29b-3p	INPP5D	0.032991	0.887108	0.933643	0.71454	2.36561	0.000468	NA	NA	NA	NA
hsa-miR-29b-3p	GDF5	0.031194	0.893223	1.23117	0.309402	2.36561	0.000468	NA	NA	NA	NA
hsa-miR-29b-3p	IL1B	0.020008	0.931401	0.864069	0.884336	2.36561	0.000468	NA	NA	NA	NA
hsa-miR-29b-3p	COL2A1	-0.0295616	0.898782	1.00858	0.986423	2.36561	0.000468	-0.762	1	NA	Microarray
hsa-miR-29b-3p	VEGFA	-0.0335943	0.885057	1.17721	0.27403	2.36561	0.000468	-0.606	0.763	PAR-CLIP	PAR-CLIP
hsa-miR-29b-3p	MMP13	-0.0345771	0.881717	0.895583	0.834042	2.36561	0.000468	NA	NA	NA	NA
hsa-miR-29b-3p	SMAD4	-0.0771771	0.739504	1.08483	0.392856	2.36561	0.000468	NA	NA	NA	NA
hsa-miR-29b-3p	IGFBP5	-0.129685	0.575291	1.29452	0.177581	2.36561	0.000468	NA	NA	NA	NA
hsa-miR-29b-3p	SIRT1	-0.188497	0.413197	0.945232	0.703658	2.36561	0.000468	-0.365	0.913	NA	NA
hsa-miR-29b-3p	TGFB1	-0.221775	0.333957	0.887273	0.585925	2.36561	0.000468	NA	NA	NA	ELISA//GFP reporter assay//qRT-PCR
hsa-miR-29b-3p	ADAMTS5	-0.436943	0.0476399	1.36417	0.016705	2.36561	0.000468	-0.264	0.53	NA	NA
hsa-miR-29b-3p	SMAD2	-0.595856	0.00436701	1.18533	0.0540127	2.36561	0.000468	NA	NA	PAR-CLIP	NA
hsa-miR-29c-3p	INPP5D	0.388438	0.081835	0.933643	0.71454	1.57509	0.0223927	NA	NA	NA	NA
hsa-miR-29c-3p	IL1B	0.312736	0.167496	0.864069	0.884336	1.57509	0.0223927	NA	NA	NA	NA
hsa-miR-29c-3p	GAS5	0.287966	0.20557	1.0647	0.746685	1.57509	0.0223927	NA	NA	NA	NA
hsa-miR-29c-3p	ACVR2B	0.231675	0.312259	0.958292	0.798923	1.57509	0.0223927	NA	NA	HITS-CLIP	NA
hsa-miR-29c-3p	SMAD4	0.156354	0.498526	1.08483	0.392856	1.57509	0.0223927	NA	NA	NA	NA
hsa-miR-29c-3p	CEBPB	0.134889	0.559917	0.939753	0.736829	1.57509	0.0223927	NA	NA	NA	NA
hsa-miR-29c-3p	CHRDL1	0.0535669	0.817619	1.49435	0.292121	1.57509	0.0223927	NA	NA	NA	NA
hsa-miR-29c-3p	MMP13	-0.0345537	0.881796	0.895583	0.834042	1.57509	0.0223927	NA	NA	NA	NA
hsa-miR-29c-3p	IGFBP5	-0.0854499	0.712666	1.29452	0.177581	1.57509	0.0223927	NA	NA	NA	NA
hsa-miR-29c-3p	SOX9	-0.162613	0.481267	0.862275	0.223147	1.57509	0.0223927	NA	NA	NA	NA
hsa-miR-29c-3p	BCL2	-0.194291	0.398714	1.1389	0.259904	1.57509	0.0223927	NA	NA	NA	Luciferase reporter assay//qRT-PCR//Western blot
hsa-miR-29c-3p	SIRT1	-0.268284	0.239651	0.945232	0.703658	1.57509	0.0223927	-0.365	0.881	NA	Luciferase reporter assay//qRT-PCR//Western blot
hsa-miR-29c-3p	COL2A1	-0.324192	0.15165	1.00858	0.986423	1.57509	0.0223927	-0.762	1	NA	Luciferase reporter assay
hsa-miR-29c-3p	TGFB1	-0.327292	0.147549	0.887273	0.585925	1.57509	0.0223927	NA	NA	NA	NA
hsa-miR-29c-3p	GDF5	-0.337791	0.13424	1.23117	0.309402	1.57509	0.0223927	NA	NA	NA	NA
hsa-miR-29c-3p	SMAD2	-0.348536	0.121523	1.18533	0.0540127	1.57509	0.0223927	NA	NA	PAR-CLIP	NA
hsa-miR-29c-3p	ADAMTS5	-0.360032	0.108902	1.36417	0.016705	1.57509	0.0223927	-0.264	0.52	NA	NA
hsa-miR-29c-3p	VEGFA	-0.510977	0.017922	1.17721	0.27403	1.57509	0.0223927	-0.606	0.734	PAR-CLIP	Sequencing//PAR-CLIP
hsa-miR-30a-5p	GAS5	0.495895	0.0222418	1.0647	0.746685	1.97275	0.000839168	NA	NA	NA	NA
hsa-miR-30a-5p	CEBPB	0.319672	0.157771	0.939753	0.736829	1.97275	0.000839168	NA	NA	NA	NA
hsa-miR-30a-5p	IL1B	0.284359	0.211558	0.864069	0.884336	1.97275	0.000839168	NA	NA	NA	NA
hsa-miR-30a-5p	MMP13	0.272841	0.231454	0.895583	0.834042	1.97275	0.000839168	NA	0.506	NA	NA
hsa-miR-30a-5p	CHRDL1	0.127092	0.583019	1.49435	0.292121	1.97275	0.000839168	NA	0.561	NA	NA
hsa-miR-30a-5p	INPP5D	0.100932	0.663329	0.933643	0.71454	1.97275	0.000839168	NA	NA	NA	NA
hsa-miR-30a-5p	GDF5	0.0964392	0.67752	1.23117	0.309402	1.97275	0.000839168	NA	NA	NA	NA
hsa-miR-30a-5p	VEGFA	-0.0842273	0.716613	1.17721	0.27403	1.97275	0.000839168	NA	0.637	HITS-CLIP	NA
hsa-miR-30a-5p	COL2A1	-0.0927885	0.689128	1.00858	0.986423	1.97275	0.000839168	NA	NA	NA	NA
hsa-miR-30a-5p	ADAMTS5	-0.181627	0.430731	1.36417	0.016705	1.97275	0.000839168	-0.12	0.835	NA	NA
hsa-miR-30a-5p	ACVR2B	-0.203942	0.375227	0.958292	0.798923	1.97275	0.000839168	NA	NA	NA	NA
hsa-miR-30a-5p	TGFB1	-0.261767	0.251695	0.887273	0.585925	1.97275	0.000839168	NA	NA	NA	NA
hsa-miR-30a-5p	BCL2	-0.344087	0.126679	1.1389	0.259904	1.97275	0.000839168	-0.187	0.769	NA	NA
hsa-miR-30a-5p	SOX9	-0.350053	0.119801	0.862275	0.223147	1.97275	0.000839168	-0.356	0.975	NA	NA
hsa-miR-30a-5p	IGFBP5	-0.386826	0.0832222	1.29452	0.177581	1.97275	0.000839168	NA	0.46	NA	NA
hsa-miR-30a-5p	SMAD4	-0.413037	0.0627497	1.08483	0.392856	1.97275	0.000839168	NA	0.687	NA	NA
hsa-miR-30a-5p	SIRT1	-0.497531	0.0217366	0.945232	0.703658	1.97275	0.000839168	-0.213	0.869	NA	NA
hsa-miR-30a-5p	SMAD2	-0.621613	0.00262852	1.18533	0.0540127	1.97275	0.000839168	-0.15	0.824	HITS-CLIP	NA
hsa-miR-30b-5p	GAS5	0.514684	0.0169712	1.0647	0.746685	1.53501	0.0309287	NA	NA	NA	NA
hsa-miR-30b-5p	CEBPB	0.299381	0.187366	0.939753	0.736829	1.53501	0.0309287	NA	NA	NA	NA
hsa-miR-30b-5p	IL1B	0.238149	0.298544	0.864069	0.884336	1.53501	0.0309287	NA	NA	NA	NA
hsa-miR-30b-5p	INPP5D	0.139762	0.54569	0.933643	0.71454	1.53501	0.0309287	NA	0.459	NA	NA
hsa-miR-30b-5p	CHRDL1	0.128564	0.578625	1.49435	0.292121	1.53501	0.0309287	NA	0.454	NA	NA
hsa-miR-30b-5p	MMP13	0.0974667	0.674265	0.895583	0.834042	1.53501	0.0309287	NA	0.509	NA	NA
hsa-miR-30b-5p	ACVR2B	-0.0376584	0.871257	0.958292	0.798923	1.53501	0.0309287	NA	NA	NA	NA
hsa-miR-30b-5p	COL2A1	-0.0527101	0.82049	1.00858	0.986423	1.53501	0.0309287	NA	NA	NA	NA
hsa-miR-30b-5p	GDF5	-0.0546969	0.813836	1.23117	0.309402	1.53501	0.0309287	NA	NA	NA	NA
hsa-miR-30b-5p	SOX9	-0.109348	0.637048	0.862275	0.223147	1.53501	0.0309287	-0.372	0.602	NA	NA
hsa-miR-30b-5p	BCL2	-0.116633	0.614629	1.1389	0.259904	1.53501	0.0309287	-0.199	0.593	NA	Luciferase reporter assay
hsa-miR-30b-5p	VEGFA	-0.166798	0.469897	1.17721	0.27403	1.53501	0.0309287	NA	NA	NA	NA
hsa-miR-30b-5p	SMAD4	-0.222651	0.332003	1.08483	0.392856	1.53501	0.0309287	NA	0.715	NA	NA
hsa-miR-30b-5p	IGFBP5	-0.303509	0.181061	1.29452	0.177581	1.53501	0.0309287	NA	NA	NA	NA
hsa-miR-30b-5p	TGFB1	-0.409566	0.0652152	0.887273	0.585925	1.53501	0.0309287	NA	NA	NA	NA
hsa-miR-30b-5p	SIRT1	-0.433694	0.0495098	0.945232	0.703658	1.53501	0.0309287	-0.191	0.857	NA	NA
hsa-miR-30b-5p	ADAMTS5	-0.436033	0.0481579	1.36417	0.016705	1.53501	0.0309287	-0.156	0.742	NA	NA
hsa-miR-30b-5p	SMAD2	-0.659351	0.00114866	1.18533	0.0540127	1.53501	0.0309287	-0.097	0.688	NA	NA
hsa-miR-30d-5p	SIRT1	0.327069	0.147842	0.945232	0.703658	1.443	0.0179071	-0.213	0.86	NA	NA
hsa-miR-30d-5p	SOX9	0.320951	0.156023	0.862275	0.223147	1.443	0.0179071	-0.356	0.973	NA	NA
hsa-miR-30d-5p	BCL2	0.306762	0.176196	1.1389	0.259904	1.443	0.0179071	-0.175	0.761	NA	NA
hsa-miR-30d-5p	TGFB1	0.179562	0.436077	0.887273	0.585925	1.443	0.0179071	NA	NA	NA	NA
hsa-miR-30d-5p	GAS5	0.0981733	0.67203	1.0647	0.746685	1.443	0.0179071	NA	NA	NA	NA
hsa-miR-30d-5p	ACVR2B	0.048205	0.835622	0.958292	0.798923	1.443	0.0179071	NA	NA	NA	NA
hsa-miR-30d-5p	VEGFA	-0.0198943	0.93179	1.17721	0.27403	1.443	0.0179071	NA	NA	HITS-CLIP	NA
hsa-miR-30d-5p	SMAD4	-0.0261614	0.910376	1.08483	0.392856	1.443	0.0179071	NA	NA	NA	NA
hsa-miR-30d-5p	IGFBP5	-0.0576084	0.804107	1.29452	0.177581	1.443	0.0179071	NA	NA	NA	NA
hsa-miR-30d-5p	SMAD2	-0.178547	0.43872	1.18533	0.0540127	1.443	0.0179071	-0.086	0.821	HITS-CLIP	NA
hsa-miR-30d-5p	CHRDL1	-0.205837	0.37071	1.49435	0.292121	1.443	0.0179071	NA	NA	NA	NA
hsa-miR-30d-5p	IL1B	-0.224795	0.327246	0.864069	0.884336	1.443	0.0179071	NA	NA	NA	NA
hsa-miR-30d-5p	ADAMTS5	-0.242261	0.290027	1.36417	0.016705	1.443	0.0179071	-0.12	0.606	NA	NA
hsa-miR-30d-5p	COL2A1	-0.253811	0.266916	1.00858	0.986423	1.443	0.0179071	NA	NA	NA	NA
hsa-miR-30d-5p	INPP5D	-0.280161	0.218673	0.933643	0.71454	1.443	0.0179071	NA	NA	NA	NA
hsa-miR-30d-5p	MMP13	-0.282453	0.214769	0.895583	0.834042	1.443	0.0179071	NA	NA	NA	NA
hsa-miR-30d-5p	GDF5	-0.297315	0.190576	1.23117	0.309402	1.443	0.0179071	NA	NA	NA	NA
hsa-miR-30d-5p	CEBPB	-0.349633	0.120276	0.939753	0.736829	1.443	0.0179071	NA	NA	NA	NA
hsa-miR-30e-5p	GAS5	0.294499	0.195012	1.0647	0.746685	1.93159	0.00222776	NA	NA	NA	NA
hsa-miR-30e-5p	INPP5D	0.210675	0.359318	0.933643	0.71454	1.93159	0.00222776	NA	NA	NA	NA
hsa-miR-30e-5p	IL1B	0.136351	0.555631	0.864069	0.884336	1.93159	0.00222776	NA	NA	NA	NA
hsa-miR-30e-5p	SMAD4	0.0410707	0.859698	1.08483	0.392856	1.93159	0.00222776	NA	NA	NA	NA
hsa-miR-30e-5p	CHRDL1	0.0320342	0.890363	1.49435	0.292121	1.93159	0.00222776	NA	0.451	NA	NA
hsa-miR-30e-5p	ACVR2B	-0.0125543	0.956927	0.958292	0.798923	1.93159	0.00222776	NA	NA	NA	NA
hsa-miR-30e-5p	MMP13	-0.0125844	0.956824	0.895583	0.834042	1.93159	0.00222776	NA	NA	NA	NA
hsa-miR-30e-5p	CEBPB	-0.0149555	0.948698	0.939753	0.736829	1.93159	0.00222776	NA	NA	NA	NA
hsa-miR-30e-5p	SIRT1	-0.0741199	0.749498	0.945232	0.703658	1.93159	0.00222776	-0.246	0.898	NA	NA
hsa-miR-30e-5p	ADAMTS5	-0.0872955	0.706722	1.36417	0.016705	1.93159	0.00222776	-0.132	0.61	NA	NA
hsa-miR-30e-5p	SOX9	-0.0904556	0.696582	0.862275	0.223147	1.93159	0.00222776	-0.356	0.973	NA	NA
hsa-miR-30e-5p	BCL2	-0.112886	0.626119	1.1389	0.259904	1.93159	0.00222776	-0.187	0.757	NA	NA
hsa-miR-30e-5p	TGFB1	-0.118596	0.608643	0.887273	0.585925	1.93159	0.00222776	NA	NA	NA	NA
hsa-miR-30e-5p	IGFBP5	-0.175057	0.447865	1.29452	0.177581	1.93159	0.00222776	NA	NA	NA	NA
hsa-miR-30e-5p	SMAD2	-0.332396	0.140967	1.18533	0.0540127	1.93159	0.00222776	-0.15	0.819	HITS-CLIP	NA
hsa-miR-30e-5p	COL2A1	-0.33607	0.136361	1.00858	0.986423	1.93159	0.00222776	NA	NA	NA	NA
hsa-miR-30e-5p	VEGFA	-0.391671	0.0791064	1.17721	0.27403	1.93159	0.00222776	NA	NA	HITS-CLIP	NA
hsa-miR-30e-5p	GDF5	-0.458732	0.0364705	1.23117	0.309402	1.93159	0.00222776	NA	NA	NA	NA
hsa-miR-31-5p	INPP5D	0.536287	0.0122053	0.933643	0.71454	1.64896	0.0098564	NA	NA	NA	NA
hsa-miR-31-5p	ACVR2B	0.506295	0.0191838	0.958292	0.798923	1.64896	0.0098564	NA	NA	NA	NA
hsa-miR-31-5p	CHRDL1	0.501886	0.0204362	1.49435	0.292121	1.64896	0.0098564	NA	NA	NA	NA
hsa-miR-31-5p	SMAD4	0.399061	0.0731247	1.08483	0.392856	1.64896	0.0098564	NA	NA	NA	NA
hsa-miR-31-5p	MMP13	0.389749	0.0807205	0.895583	0.834042	1.64896	0.0098564	NA	NA	NA	NA
hsa-miR-31-5p	IGFBP5	0.287054	0.207073	1.29452	0.177581	1.64896	0.0098564	NA	NA	NA	NA
hsa-miR-31-5p	IL1B	0.260348	0.254369	0.864069	0.884336	1.64896	0.0098564	NA	NA	NA	NA
hsa-miR-31-5p	ADAMTS5	0.209735	0.361514	1.36417	0.016705	1.64896	0.0098564	NA	NA	NA	NA
hsa-miR-31-5p	CEBPB	0.157502	0.495339	0.939753	0.736829	1.64896	0.0098564	NA	NA	NA	NA
hsa-miR-31-5p	COL2A1	0.128641	0.578397	1.00858	0.986423	1.64896	0.0098564	NA	NA	NA	NA
hsa-miR-31-5p	VEGFA	0.0497913	0.830287	1.17721	0.27403	1.64896	0.0098564	NA	NA	NA	NA
hsa-miR-31-5p	GDF5	0.0436405	0.851011	1.23117	0.309402	1.64896	0.0098564	NA	NA	NA	NA
hsa-miR-31-5p	SMAD2	-0.0773255	0.73902	1.18533	0.0540127	1.64896	0.0098564	NA	NA	NA	NA
hsa-miR-31-5p	SOX9	-0.109984	0.635077	0.862275	0.223147	1.64896	0.0098564	NA	NA	NA	NA
hsa-miR-31-5p	SIRT1	-0.115705	0.617467	0.945232	0.703658	1.64896	0.0098564	NA	NA	NA	NA
hsa-miR-31-5p	BCL2	-0.143734	0.534216	1.1389	0.259904	1.64896	0.0098564	NA	NA	NA	NA
hsa-miR-31-5p	GAS5	-0.171358	0.457665	1.0647	0.746685	1.64896	0.0098564	NA	NA	NA	NA
hsa-miR-31-5p	TGFB1	-0.279645	0.219558	0.887273	0.585925	1.64896	0.0098564	NA	NA	NA	NA
hsa-miR-320a	IGFBP5	0.486986	0.02516	1.29452	0.177581	0.657888	0.0329459	NA	0.614	NA	NA
hsa-miR-320a	SIRT1	0.472223	0.0306574	0.945232	0.703658	0.657888	0.0329459	NA	NA	NA	NA
hsa-miR-320a	VEGFA	0.443088	0.0442534	1.17721	0.27403	0.657888	0.0329459	NA	NA	NA	NA
hsa-miR-320a	SOX9	0.434671	0.0489414	0.862275	0.223147	0.657888	0.0329459	NA	0.755	NA	NA
hsa-miR-320a	BCL2	0.400995	0.0716176	1.1389	0.259904	0.657888	0.0329459	NA	0.616	NA	NA
hsa-miR-320a	COL2A1	0.374449	0.0944556	1.00858	0.986423	0.657888	0.0329459	NA	NA	NA	NA
hsa-miR-320a	SMAD2	0.326421	0.148693	1.18533	0.0540127	0.657888	0.0329459	NA	0.552	PAR-CLIP	NA
hsa-miR-320a	SMAD4	0.29898	0.187986	1.08483	0.392856	0.657888	0.0329459	NA	0.75	NA	NA
hsa-miR-320a	ACVR2B	0.287175	0.206873	0.958292	0.798923	0.657888	0.0329459	-0.041	NA	HITS-CLIP	NA
hsa-miR-320a	GDF5	0.261308	0.252558	1.23117	0.309402	0.657888	0.0329459	NA	0.468	NA	NA
hsa-miR-320a	CHRDL1	0.236005	0.303043	1.49435	0.292121	0.657888	0.0329459	NA	NA	NA	NA
hsa-miR-320a	ADAMTS5	0.165507	0.47339	1.36417	0.016705	0.657888	0.0329459	NA	0.775	NA	NA
hsa-miR-320a	TGFB1	0.0375895	0.871491	0.887273	0.585925	0.657888	0.0329459	NA	NA	NA	NA
hsa-miR-320a	INPP5D	-0.0981217	0.672193	0.933643	0.71454	0.657888	0.0329459	NA	NA	NA	NA
hsa-miR-320a	MMP13	-0.123131	0.594907	0.895583	0.834042	0.657888	0.0329459	NA	NA	NA	NA
hsa-miR-320a	CEBPB	-0.303441	0.181164	0.939753	0.736829	0.657888	0.0329459	NA	NA	NA	NA
hsa-miR-320a	GAS5	-0.385138	0.0846926	1.0647	0.746685	0.657888	0.0329459	NA	NA	NA	NA
hsa-miR-320a	IL1B	-0.432824	0.0500199	0.864069	0.884336	0.657888	0.0329459	NA	NA	NA	NA
hsa-miR-320b	IGFBP5	0.460604	0.0356162	1.29452	0.177581	0.656021	0.0307796	NA	0.614	HITS-CLIP	NA
hsa-miR-320b	VEGFA	0.446422	0.0424953	1.17721	0.27403	0.656021	0.0307796	NA	NA	NA	NA
hsa-miR-320b	SMAD2	0.42151	0.057028	1.18533	0.0540127	0.656021	0.0307796	NA	0.552	NA	NA
hsa-miR-320b	SIRT1	0.370926	0.0978474	0.945232	0.703658	0.656021	0.0307796	NA	NA	HITS-CLIP	NA
hsa-miR-320b	COL2A1	0.338096	0.133866	1.00858	0.986423	0.656021	0.0307796	NA	NA	NA	NA
hsa-miR-320b	ADAMTS5	0.297828	0.189776	1.36417	0.016705	0.656021	0.0307796	NA	0.775	NA	NA
hsa-miR-320b	GDF5	0.290552	0.201346	1.23117	0.309402	0.656021	0.0307796	NA	0.468	NA	NA
hsa-miR-320b	SOX9	0.267369	0.241318	0.862275	0.223147	0.656021	0.0307796	NA	0.755	NA	NA
hsa-miR-320b	SMAD4	0.265448	0.244845	1.08483	0.392856	0.656021	0.0307796	NA	0.75	NA	NA
hsa-miR-320b	BCL2	0.26233	0.25064	1.1389	0.259904	0.656021	0.0307796	NA	0.615	NA	NA
hsa-miR-320b	ACVR2B	0.198385	0.388654	0.958292	0.798923	0.656021	0.0307796	-0.041	NA	HITS-CLIP	NA
hsa-miR-320b	CHRDL1	0.158291	0.493153	1.49435	0.292121	0.656021	0.0307796	NA	NA	NA	NA
hsa-miR-320b	TGFB1	0.0742252	0.749153	0.887273	0.585925	0.656021	0.0307796	NA	NA	NA	NA
hsa-miR-320b	MMP13	-0.029921	0.897557	0.895583	0.834042	0.656021	0.0307796	NA	NA	NA	NA
hsa-miR-320b	INPP5D	-0.107529	0.642693	0.933643	0.71454	0.656021	0.0307796	NA	NA	NA	NA
hsa-miR-320b	CEBPB	-0.208242	0.36502	0.939753	0.736829	0.656021	0.0307796	NA	NA	NA	NA
hsa-miR-320b	IL1B	-0.293034	0.197348	0.864069	0.884336	0.656021	0.0307796	NA	NA	NA	NA
hsa-miR-320b	GAS5	-0.392783	0.0781842	1.0647	0.746685	0.656021	0.0307796	NA	NA	NA	NA
hsa-miR-320c	IGFBP5	0.516689	0.0164739	1.29452	0.177581	0.614426	0.0129952	NA	0.611	HITS-CLIP	NA
hsa-miR-320c	SMAD2	0.437434	0.0473623	1.18533	0.0540127	0.614426	0.0129952	NA	0.556	NA	NA
hsa-miR-320c	SIRT1	0.384134	0.085576	0.945232	0.703658	0.614426	0.0129952	NA	NA	HITS-CLIP	NA
hsa-miR-320c	VEGFA	0.356472	0.112705	1.17721	0.27403	0.614426	0.0129952	NA	NA	NA	NA
hsa-miR-320c	SMAD4	0.344539	0.126148	1.08483	0.392856	0.614426	0.0129952	NA	0.753	NA	NA
hsa-miR-320c	ACVR2B	0.287844	0.20577	0.958292	0.798923	0.614426	0.0129952	-0.041	NA	HITS-CLIP	NA
hsa-miR-320c	ADAMTS5	0.286497	0.207995	1.36417	0.016705	0.614426	0.0129952	NA	0.775	NA	NA
hsa-miR-320c	COL2A1	0.278413	0.221683	1.00858	0.986423	0.614426	0.0129952	NA	NA	NA	NA
hsa-miR-320c	SOX9	0.245924	0.282567	0.862275	0.223147	0.614426	0.0129952	NA	0.754	NA	NA
hsa-miR-320c	BCL2	0.231218	0.313242	1.1389	0.259904	0.614426	0.0129952	NA	0.617	NA	NA
hsa-miR-320c	CHRDL1	0.217163	0.344363	1.49435	0.292121	0.614426	0.0129952	NA	NA	NA	NA
hsa-miR-320c	GDF5	0.183723	0.425339	1.23117	0.309402	0.614426	0.0129952	NA	0.469	NA	NA
hsa-miR-320c	TGFB1	0.039108	0.866343	0.887273	0.585925	0.614426	0.0129952	NA	NA	NA	NA
hsa-miR-320c	INPP5D	0.00412974	0.985826	0.933643	0.71454	0.614426	0.0129952	NA	NA	NA	NA
hsa-miR-320c	MMP13	-0.0434397	0.851689	0.895583	0.834042	0.614426	0.0129952	NA	NA	NA	NA
hsa-miR-320c	CEBPB	-0.228534	0.319049	0.939753	0.736829	0.614426	0.0129952	NA	NA	NA	NA
hsa-miR-320c	IL1B	-0.246106	0.2822	0.864069	0.884336	0.614426	0.0129952	NA	NA	NA	NA
hsa-miR-320c	GAS5	-0.377787	0.0913215	1.0647	0.746685	0.614426	0.0129952	NA	NA	NA	NA
hsa-miR-320d	IGFBP5	0.520411	0.0155822	1.29452	0.177581	0.624649	0.0212664	NA	0.586	NA	NA
hsa-miR-320d	SIRT1	0.480136	0.0276043	0.945232	0.703658	0.624649	0.0212664	NA	NA	HITS-CLIP	NA
hsa-miR-320d	ACVR2B	0.419946	0.0580531	0.958292	0.798923	0.624649	0.0212664	-0.041	NA	HITS-CLIP	NA
hsa-miR-320d	SMAD4	0.408746	0.0658083	1.08483	0.392856	0.624649	0.0212664	NA	0.756	NA	NA
hsa-miR-320d	SMAD2	0.370556	0.0982092	1.18533	0.0540127	0.624649	0.0212664	NA	0.554	NA	NA
hsa-miR-320d	SOX9	0.36332	0.105475	0.862275	0.223147	0.624649	0.0212664	NA	0.755	NA	NA
hsa-miR-320d	CHRDL1	0.257149	0.260462	1.49435	0.292121	0.624649	0.0212664	NA	NA	NA	NA
hsa-miR-320d	BCL2	0.249739	0.274927	1.1389	0.259904	0.624649	0.0212664	NA	0.617	NA	NA
hsa-miR-320d	VEGFA	0.225584	0.325507	1.17721	0.27403	0.624649	0.0212664	NA	NA	NA	NA
hsa-miR-320d	ADAMTS5	0.197389	0.391087	1.36417	0.016705	0.624649	0.0212664	NA	0.778	NA	NA
hsa-miR-320d	COL2A1	0.173106	0.453021	1.00858	0.986423	0.624649	0.0212664	NA	NA	NA	NA
hsa-miR-320d	INPP5D	0.142353	0.538194	0.933643	0.71454	0.624649	0.0212664	NA	NA	NA	NA
hsa-miR-320d	TGFB1	0.00472817	0.983772	0.887273	0.585925	0.624649	0.0212664	NA	NA	NA	NA
hsa-miR-320d	GDF5	-0.0144907	0.950291	1.23117	0.309402	0.624649	0.0212664	NA	0.471	NA	NA
hsa-miR-320d	MMP13	-0.101332	0.662071	0.895583	0.834042	0.624649	0.0212664	NA	NA	NA	NA
hsa-miR-320d	IL1B	-0.291072	0.200505	0.864069	0.884336	0.624649	0.0212664	NA	NA	NA	NA
hsa-miR-320d	CEBPB	-0.298447	0.188813	0.939753	0.736829	0.624649	0.0212664	NA	NA	NA	NA
hsa-miR-320d	GAS5	-0.342452	0.128612	1.0647	0.746685	0.624649	0.0212664	NA	NA	NA	NA
hsa-miR-320e	SIRT1	0.544683	0.010676	0.945232	0.703658	0.628748	0.0332802	NA	NA	NA	NA
hsa-miR-320e	IGFBP5	0.533755	0.0126999	1.29452	0.177581	0.628748	0.0332802	NA	0.465	NA	NA
hsa-miR-320e	SOX9	0.451694	0.0398273	0.862275	0.223147	0.628748	0.0332802	NA	0.547	NA	NA
hsa-miR-320e	ACVR2B	0.423626	0.0556637	0.958292	0.798923	0.628748	0.0332802	NA	NA	HITS-CLIP	NA
hsa-miR-320e	SMAD4	0.372271	0.0965417	1.08483	0.392856	0.628748	0.0332802	NA	0.561	NA	NA
hsa-miR-320e	SMAD2	0.359586	0.109374	1.18533	0.0540127	0.628748	0.0332802	NA	0.558	NA	NA
hsa-miR-320e	BCL2	0.349099	0.120882	1.1389	0.259904	0.628748	0.0332802	NA	0.576	NA	NA
hsa-miR-320e	VEGFA	0.32621	0.148971	1.17721	0.27403	0.628748	0.0332802	NA	NA	NA	NA
hsa-miR-320e	CHRDL1	0.277539	0.223196	1.49435	0.292121	0.628748	0.0332802	NA	NA	NA	NA
hsa-miR-320e	COL2A1	0.245031	0.284374	1.00858	0.986423	0.628748	0.0332802	NA	NA	NA	NA
hsa-miR-320e	ADAMTS5	0.157968	0.494047	1.36417	0.016705	0.628748	0.0332802	NA	0.613	NA	NA
hsa-miR-320e	GDF5	0.0527964	0.820201	1.23117	0.309402	0.628748	0.0332802	NA	0.542	NA	NA
hsa-miR-320e	INPP5D	0.0459724	0.843142	0.933643	0.71454	0.628748	0.0332802	NA	0.74	NA	NA
hsa-miR-320e	TGFB1	0.0166895	0.942759	0.887273	0.585925	0.628748	0.0332802	NA	NA	NA	NA
hsa-miR-320e	MMP13	-0.14405	0.533309	0.895583	0.834042	0.628748	0.0332802	NA	NA	NA	NA
hsa-miR-320e	CEBPB	-0.345095	0.125497	0.939753	0.736829	0.628748	0.0332802	NA	NA	NA	NA
hsa-miR-320e	GAS5	-0.377079	0.0919796	1.0647	0.746685	0.628748	0.0332802	NA	NA	NA	NA
hsa-miR-320e	IL1B	-0.379319	0.0899092	0.864069	0.884336	0.628748	0.0332802	NA	NA	NA	NA
hsa-miR-32-5p	INPP5D	0.31017	0.171196	0.933643	0.71454	2.54982	0.041366	NA	NA	NA	NA
hsa-miR-32-5p	CHRDL1	0.219228	0.339682	1.49435	0.292121	2.54982	0.041366	NA	NA	NA	NA
hsa-miR-32-5p	SOX9	0.183218	0.426636	0.862275	0.223147	2.54982	0.041366	NA	NA	NA	NA
hsa-miR-32-5p	SIRT1	0.106039	0.647333	0.945232	0.703658	2.54982	0.041366	NA	0.724	PAR-CLIP	NA
hsa-miR-32-5p	SMAD4	0.0881113	0.7041	1.08483	0.392856	2.54982	0.041366	NA	0.551	NA	NA
hsa-miR-32-5p	ACVR2B	0.0831912	0.719963	0.958292	0.798923	2.54982	0.041366	NA	NA	NA	NA
hsa-miR-32-5p	GAS5	0.0778408	0.73734	1.0647	0.746685	2.54982	0.041366	NA	NA	NA	NA
hsa-miR-32-5p	BCL2	0.057491	0.804499	1.1389	0.259904	2.54982	0.041366	NA	0.452	NA	NA
hsa-miR-32-5p	MMP13	0.0130458	0.955242	0.895583	0.834042	2.54982	0.041366	NA	0.634	NA	NA
hsa-miR-32-5p	IL1B	-0.0370717	0.873247	0.864069	0.884336	2.54982	0.041366	NA	NA	NA	NA
hsa-miR-32-5p	SMAD2	-0.0707778	0.760468	1.18533	0.0540127	2.54982	0.041366	NA	0.479	NA	NA
hsa-miR-32-5p	CEBPB	-0.0964506	0.677483	0.939753	0.736829	2.54982	0.041366	NA	0.478	NA	NA
hsa-miR-32-5p	IGFBP5	-0.0991701	0.668881	1.29452	0.177581	2.54982	0.041366	NA	0.479	NA	NA
hsa-miR-32-5p	ADAMTS5	-0.112507	0.627289	1.36417	0.016705	2.54982	0.041366	NA	0.731	NA	NA
hsa-miR-32-5p	COL2A1	-0.121998	0.598329	1.00858	0.986423	2.54982	0.041366	NA	0.635	NA	NA
hsa-miR-32-5p	VEGFA	-0.254635	0.265315	1.17721	0.27403	2.54982	0.041366	NA	NA	NA	NA
hsa-miR-32-5p	TGFB1	-0.258006	0.25882	0.887273	0.585925	2.54982	0.041366	NA	NA	NA	NA
hsa-miR-32-5p	GDF5	-0.469275	0.0318606	1.23117	0.309402	2.54982	0.041366	NA	NA	NA	NA
hsa-miR-328-3p	IGFBP5	0.428056	0.0528876	1.29452	0.177581	0.533692	1.21891e-06	NA	NA	NA	NA
hsa-miR-328-3p	SMAD4	0.387135	0.0829551	1.08483	0.392856	0.533692	1.21891e-06	NA	NA	NA	NA
hsa-miR-328-3p	SMAD2	0.366884	0.101848	1.18533	0.0540127	0.533692	1.21891e-06	NA	NA	NA	NA
hsa-miR-328-3p	BCL2	0.325206	0.1503	1.1389	0.259904	0.533692	1.21891e-06	NA	NA	NA	NA
hsa-miR-328-3p	ACVR2B	0.310615	0.170549	0.958292	0.798923	0.533692	1.21891e-06	NA	NA	NA	NA
hsa-miR-328-3p	COL2A1	0.282569	0.214573	1.00858	0.986423	0.533692	1.21891e-06	NA	NA	NA	NA
hsa-miR-328-3p	CHRDL1	0.279081	0.220529	1.49435	0.292121	0.533692	1.21891e-06	NA	NA	NA	NA
hsa-miR-328-3p	SIRT1	0.195197	0.396476	0.945232	0.703658	0.533692	1.21891e-06	NA	NA	NA	NA
hsa-miR-328-3p	SOX9	0.16919	0.46346	0.862275	0.223147	0.533692	1.21891e-06	NA	NA	NA	NA
hsa-miR-328-3p	TGFB1	0.0573301	0.805036	0.887273	0.585925	0.533692	1.21891e-06	NA	NA	NA	NA
hsa-miR-328-3p	VEGFA	0.0444569	0.848254	1.17721	0.27403	0.533692	1.21891e-06	NA	NA	NA	NA
hsa-miR-328-3p	INPP5D	0.00279229	0.990416	0.933643	0.71454	0.533692	1.21891e-06	NA	NA	NA	NA
hsa-miR-328-3p	GDF5	-0.0645038	0.781179	1.23117	0.309402	0.533692	1.21891e-06	NA	NA	NA	NA
hsa-miR-328-3p	ADAMTS5	-0.090074	0.697804	1.36417	0.016705	0.533692	1.21891e-06	NA	NA	NA	NA
hsa-miR-328-3p	GAS5	-0.172843	0.453716	1.0647	0.746685	0.533692	1.21891e-06	NA	NA	NA	NA
hsa-miR-328-3p	CEBPB	-0.173603	0.451704	0.939753	0.736829	0.533692	1.21891e-06	NA	NA	NA	NA
hsa-miR-328-3p	IL1B	-0.180342	0.434055	0.864069	0.884336	0.533692	1.21891e-06	NA	NA	NA	NA
hsa-miR-328-3p	MMP13	-0.251159	0.272117	0.895583	0.834042	0.533692	1.21891e-06	NA	NA	NA	NA
hsa-miR-329-3p	ACVR2B	0.560193	0.00826229	0.958292	0.798923	0.434282	0.00621604	NA	NA	NA	NA
hsa-miR-329-3p	CHRDL1	0.349751	0.120143	1.49435	0.292121	0.434282	0.00621604	-0.02	0.522	NA	NA
hsa-miR-329-3p	SMAD4	0.341128	0.130194	1.08483	0.392856	0.434282	0.00621604	NA	0.665	NA	NA
hsa-miR-329-3p	IGFBP5	0.31951	0.157994	1.29452	0.177581	0.434282	0.00621604	NA	NA	NA	NA
hsa-miR-329-3p	INPP5D	0.28826	0.205087	0.933643	0.71454	0.434282	0.00621604	NA	NA	NA	NA
hsa-miR-329-3p	SIRT1	0.119334	0.606399	0.945232	0.703658	0.434282	0.00621604	NA	0.726	NA	NA
hsa-miR-329-3p	SOX9	0.114564	0.620965	0.862275	0.223147	0.434282	0.00621604	NA	NA	NA	HITS-CLIP
hsa-miR-329-3p	IL1B	0.108608	0.639342	0.864069	0.884336	0.434282	0.00621604	NA	NA	NA	NA
hsa-miR-329-3p	MMP13	0.0490878	0.832652	0.895583	0.834042	0.434282	0.00621604	NA	NA	NA	NA
hsa-miR-329-3p	BCL2	0.0313843	0.892575	1.1389	0.259904	0.434282	0.00621604	NA	NA	NA	NA
hsa-miR-329-3p	SMAD2	-0.0409658	0.860053	1.18533	0.0540127	0.434282	0.00621604	-0.16	0.488	NA	HITS-CLIP
hsa-miR-329-3p	COL2A1	-0.0632982	0.785176	1.00858	0.986423	0.434282	0.00621604	NA	NA	NA	NA
hsa-miR-329-3p	CEBPB	-0.0720956	0.756137	0.939753	0.736829	0.434282	0.00621604	NA	NA	NA	NA
hsa-miR-329-3p	GAS5	-0.090942	0.695026	1.0647	0.746685	0.434282	0.00621604	NA	NA	NA	NA
hsa-miR-329-3p	ADAMTS5	-0.0949196	0.682343	1.36417	0.016705	0.434282	0.00621604	NA	0.519	NA	NA
hsa-miR-329-3p	GDF5	-0.139267	0.54713	1.23117	0.309402	0.434282	0.00621604	NA	NA	NA	NA
hsa-miR-329-3p	VEGFA	-0.147018	0.524818	1.17721	0.27403	0.434282	0.00621604	NA	NA	NA	PAR-CLIP//HITS-CLIP
hsa-miR-329-3p	TGFB1	-0.332469	0.140875	0.887273	0.585925	0.434282	0.00621604	NA	NA	NA	NA
hsa-miR-331-3p	CHRDL1	0.358104	0.11095	1.49435	0.292121	0.663806	0.026844	NA	NA	NA	NA
hsa-miR-331-3p	INPP5D	0.357478	0.11162	0.933643	0.71454	0.663806	0.026844	NA	NA	NA	NA
hsa-miR-331-3p	SMAD4	0.293668	0.196335	1.08483	0.392856	0.663806	0.026844	NA	NA	NA	NA
hsa-miR-331-3p	ACVR2B	0.228415	0.319308	0.958292	0.798923	0.663806	0.026844	NA	NA	NA	NA
hsa-miR-331-3p	GAS5	0.214972	0.349372	1.0647	0.746685	0.663806	0.026844	NA	NA	NA	NA
hsa-miR-331-3p	CEBPB	0.138331	0.549851	0.939753	0.736829	0.663806	0.026844	NA	NA	NA	NA
hsa-miR-331-3p	COL2A1	0.134051	0.562382	1.00858	0.986423	0.663806	0.026844	NA	NA	NA	NA
hsa-miR-331-3p	IGFBP5	0.130087	0.574096	1.29452	0.177581	0.663806	0.026844	NA	NA	NA	CLASH
hsa-miR-331-3p	BCL2	0.0396729	0.864429	1.1389	0.259904	0.663806	0.026844	NA	NA	NA	NA
hsa-miR-331-3p	IL1B	0.00861776	0.970426	0.864069	0.884336	0.663806	0.026844	NA	NA	NA	NA
hsa-miR-331-3p	SOX9	-0.00170073	0.994162	0.862275	0.223147	0.663806	0.026844	NA	NA	NA	NA
hsa-miR-331-3p	TGFB1	-0.13706	0.553558	0.887273	0.585925	0.663806	0.026844	NA	NA	NA	NA
hsa-miR-331-3p	MMP13	-0.138195	0.550249	0.895583	0.834042	0.663806	0.026844	NA	NA	NA	NA
hsa-miR-331-3p	SIRT1	-0.138211	0.550201	0.945232	0.703658	0.663806	0.026844	NA	NA	NA	CLASH
hsa-miR-331-3p	GDF5	-0.203091	0.377267	1.23117	0.309402	0.663806	0.026844	NA	NA	NA	NA
hsa-miR-331-3p	SMAD2	-0.209982	0.360938	1.18533	0.0540127	0.663806	0.026844	NA	NA	NA	NA
hsa-miR-331-3p	ADAMTS5	-0.246435	0.281536	1.36417	0.016705	0.663806	0.026844	NA	NA	HITS-CLIP	NA
hsa-miR-331-3p	VEGFA	-0.295854	0.19287	1.17721	0.27403	0.663806	0.026844	NA	NA	NA	NA
hsa-miR-335-3p	INPP5D	0.257523	0.259744	0.933643	0.71454	1.8092	0.0448813	NA	NA	NA	NA
hsa-miR-335-3p	SIRT1	0.255719	0.263214	0.945232	0.703658	1.8092	0.0448813	NA	0.615	NA	NA
hsa-miR-335-3p	SOX9	0.24283	0.288859	0.862275	0.223147	1.8092	0.0448813	NA	NA	NA	NA
hsa-miR-335-3p	ACVR2B	0.207163	0.367568	0.958292	0.798923	1.8092	0.0448813	NA	NA	NA	NA
hsa-miR-335-3p	CHRDL1	0.145033	0.53049	1.49435	0.292121	1.8092	0.0448813	NA	0.637	NA	NA
hsa-miR-335-3p	BCL2	0.098307	0.671607	1.1389	0.259904	1.8092	0.0448813	NA	0.881	NA	NA
hsa-miR-335-3p	SMAD2	0.0860966	0.710581	1.18533	0.0540127	1.8092	0.0448813	NA	0.617	NA	NA
hsa-miR-335-3p	SMAD4	0.0439901	0.84983	1.08483	0.392856	1.8092	0.0448813	NA	0.747	NA	NA
hsa-miR-335-3p	IL1B	0.0308878	0.894265	0.864069	0.884336	1.8092	0.0448813	NA	0.457	NA	NA
hsa-miR-335-3p	IGFBP5	0.0118509	0.959339	1.29452	0.177581	1.8092	0.0448813	NA	0.772	NA	NA
hsa-miR-335-3p	TGFB1	-0.112087	0.62858	0.887273	0.585925	1.8092	0.0448813	NA	NA	NA	NA
hsa-miR-335-3p	GAS5	-0.125853	0.586728	1.0647	0.746685	1.8092	0.0448813	NA	NA	NA	NA
hsa-miR-335-3p	ADAMTS5	-0.138635	0.548967	1.36417	0.016705	1.8092	0.0448813	NA	0.934	NA	NA
hsa-miR-335-3p	MMP13	-0.1415	0.540657	0.895583	0.834042	1.8092	0.0448813	NA	0.566	NA	NA
hsa-miR-335-3p	COL2A1	-0.190281	0.408707	1.00858	0.986423	1.8092	0.0448813	NA	0.789	NA	NA
hsa-miR-335-3p	VEGFA	-0.320858	0.156149	1.17721	0.27403	1.8092	0.0448813	NA	NA	NA	NA
hsa-miR-335-3p	CEBPB	-0.424341	0.0552078	0.939753	0.736829	1.8092	0.0448813	NA	NA	HITS-CLIP	NA
hsa-miR-335-3p	GDF5	-0.617331	0.00286857	1.23117	0.309402	1.8092	0.0448813	NA	NA	NA	NA
hsa-miR-335-5p	INPP5D	0.3841	0.0856059	0.933643	0.71454	2.08529	0.041366	NA	NA	NA	NA
hsa-miR-335-5p	CHRDL1	0.313226	0.166795	1.49435	0.292121	2.08529	0.041366	NA	NA	NA	NA
hsa-miR-335-5p	ACVR2B	0.183869	0.424965	0.958292	0.798923	2.08529	0.041366	NA	NA	Microarrays	Microarray
hsa-miR-335-5p	SMAD4	0.157596	0.495076	1.08483	0.392856	2.08529	0.041366	NA	NA	NA	NA
hsa-miR-335-5p	SOX9	0.119319	0.606446	0.862275	0.223147	2.08529	0.041366	NA	NA	Microarrays	Microarray
hsa-miR-335-5p	GAS5	0.0719362	0.756661	1.0647	0.746685	2.08529	0.041366	NA	NA	NA	NA
hsa-miR-335-5p	SIRT1	0.0698659	0.763469	0.945232	0.703658	2.08529	0.041366	NA	NA	NA	NA
hsa-miR-335-5p	IL1B	0.0684974	0.767978	0.864069	0.884336	2.08529	0.041366	NA	NA	NA	NA
hsa-miR-335-5p	BCL2	0.0208937	0.928372	1.1389	0.259904	2.08529	0.041366	NA	NA	NA	NA
hsa-miR-335-5p	MMP13	-0.00477084	0.983625	0.895583	0.834042	2.08529	0.041366	NA	NA	NA	NA
hsa-miR-335-5p	IGFBP5	-0.0220644	0.924369	1.29452	0.177581	2.08529	0.041366	NA	NA	NA	NA
hsa-miR-335-5p	COL2A1	-0.109398	0.636892	1.00858	0.986423	2.08529	0.041366	NA	NA	NA	NA
hsa-miR-335-5p	CEBPB	-0.13866	0.548895	0.939753	0.736829	2.08529	0.041366	NA	NA	NA	NA
hsa-miR-335-5p	ADAMTS5	-0.140754	0.542816	1.36417	0.016705	2.08529	0.041366	NA	NA	NA	NA
hsa-miR-335-5p	SMAD2	-0.196546	0.393156	1.18533	0.0540127	2.08529	0.041366	NA	NA	NA	NA
hsa-miR-335-5p	TGFB1	-0.271664	0.233553	0.887273	0.585925	2.08529	0.041366	NA	NA	NA	NA
hsa-miR-335-5p	VEGFA	-0.365455	0.103292	1.17721	0.27403	2.08529	0.041366	NA	NA	Microarrays	Microarray
hsa-miR-335-5p	GDF5	-0.469722	0.0316758	1.23117	0.309402	2.08529	0.041366	NA	NA	Microarrays	Microarray
hsa-miR-339-3p	CHRDL1	0.387744	0.08243	1.49435	0.292121	0.754666	0.0369942	NA	NA	NA	NA
hsa-miR-339-3p	IGFBP5	0.383553	0.0860907	1.29452	0.177581	0.754666	0.0369942	NA	NA	NA	NA
hsa-miR-339-3p	SMAD4	0.364503	0.104261	1.08483	0.392856	0.754666	0.0369942	NA	NA	NA	NA
hsa-miR-339-3p	ACVR2B	0.306108	0.177167	0.958292	0.798923	0.754666	0.0369942	NA	NA	NA	NA
hsa-miR-339-3p	SMAD2	0.254077	0.266399	1.18533	0.0540127	0.754666	0.0369942	NA	NA	NA	NA
hsa-miR-339-3p	SIRT1	0.226963	0.322478	0.945232	0.703658	0.754666	0.0369942	NA	NA	NA	NA
hsa-miR-339-3p	BCL2	0.189873	0.409731	1.1389	0.259904	0.754666	0.0369942	NA	NA	NA	NA
hsa-miR-339-3p	INPP5D	0.16295	0.480346	0.933643	0.71454	0.754666	0.0369942	NA	NA	NA	NA
hsa-miR-339-3p	COL2A1	0.160385	0.487375	1.00858	0.986423	0.754666	0.0369942	NA	NA	NA	NA
hsa-miR-339-3p	SOX9	0.142822	0.536841	0.862275	0.223147	0.754666	0.0369942	NA	NA	NA	NA
hsa-miR-339-3p	ADAMTS5	0.0383928	0.868767	1.36417	0.016705	0.754666	0.0369942	NA	NA	NA	NA
hsa-miR-339-3p	VEGFA	-0.0617743	0.790235	1.17721	0.27403	0.754666	0.0369942	NA	NA	NA	NA
hsa-miR-339-3p	GAS5	-0.0742569	0.749049	1.0647	0.746685	0.754666	0.0369942	NA	NA	NA	NA
hsa-miR-339-3p	TGFB1	-0.101287	0.662214	0.887273	0.585925	0.754666	0.0369942	NA	NA	NA	NA
hsa-miR-339-3p	IL1B	-0.129794	0.574967	0.864069	0.884336	0.754666	0.0369942	NA	NA	NA	NA
hsa-miR-339-3p	MMP13	-0.164048	0.477352	0.895583	0.834042	0.754666	0.0369942	NA	NA	NA	NA
hsa-miR-339-3p	CEBPB	-0.177021	0.442707	0.939753	0.736829	0.754666	0.0369942	NA	NA	NA	NA
hsa-miR-339-3p	GDF5	-0.24153	0.291529	1.23117	0.309402	0.754666	0.0369942	NA	NA	NA	NA
hsa-miR-339-5p	CHRDL1	0.341111	0.130214	1.49435	0.292121	0.73	0.0371404	NA	NA	NA	NA
hsa-miR-339-5p	ACVR2B	0.304543	0.179505	0.958292	0.798923	0.73	0.0371404	NA	NA	NA	NA
hsa-miR-339-5p	INPP5D	0.279164	0.220386	0.933643	0.71454	0.73	0.0371404	NA	NA	NA	NA
hsa-miR-339-5p	SMAD4	0.268113	0.239962	1.08483	0.392856	0.73	0.0371404	NA	NA	NA	NA
hsa-miR-339-5p	IGFBP5	0.227533	0.32123	1.29452	0.177581	0.73	0.0371404	NA	0.554	NA	NA
hsa-miR-339-5p	BCL2	0.175445	0.446843	1.1389	0.259904	0.73	0.0371404	NA	0.484	NA	NA
hsa-miR-339-5p	SOX9	0.16709	0.46911	0.862275	0.223147	0.73	0.0371404	NA	NA	NA	NA
hsa-miR-339-5p	SIRT1	0.0906602	0.695927	0.945232	0.703658	0.73	0.0371404	NA	NA	NA	NA
hsa-miR-339-5p	SMAD2	0.0845319	0.715629	1.18533	0.0540127	0.73	0.0371404	NA	NA	NA	NA
hsa-miR-339-5p	IL1B	0.0597681	0.796908	0.864069	0.884336	0.73	0.0371404	NA	NA	NA	NA
hsa-miR-339-5p	COL2A1	0.0432783	0.852234	1.00858	0.986423	0.73	0.0371404	NA	NA	NA	NA
hsa-miR-339-5p	GAS5	0.00332489	0.988588	1.0647	0.746685	0.73	0.0371404	NA	NA	NA	NA
hsa-miR-339-5p	MMP13	-0.130446	0.573031	0.895583	0.834042	0.73	0.0371404	NA	NA	NA	NA
hsa-miR-339-5p	CEBPB	-0.138348	0.549804	0.939753	0.736829	0.73	0.0371404	NA	NA	HITS-CLIP	NA
hsa-miR-339-5p	VEGFA	-0.228874	0.318309	1.17721	0.27403	0.73	0.0371404	NA	0.668	HITS-CLIP	NA
hsa-miR-339-5p	ADAMTS5	-0.232529	0.310429	1.36417	0.016705	0.73	0.0371404	NA	0.453	NA	NA
hsa-miR-339-5p	TGFB1	-0.280831	0.217527	0.887273	0.585925	0.73	0.0371404	NA	NA	NA	NA
hsa-miR-339-5p	GDF5	-0.340099	0.131432	1.23117	0.309402	0.73	0.0371404	NA	NA	NA	NA
hsa-miR-340-5p	GAS5	0.188229	0.413873	1.0647	0.746685	2.63408	4.55132e-05	NA	NA	NA	NA
hsa-miR-340-5p	INPP5D	0.16852	0.465259	0.933643	0.71454	2.63408	4.55132e-05	NA	NA	NA	NA
hsa-miR-340-5p	IL1B	0.120558	0.602685	0.864069	0.884336	2.63408	4.55132e-05	NA	0.67	NA	NA
hsa-miR-340-5p	ACVR2B	0.0665972	0.774252	0.958292	0.798923	2.63408	4.55132e-05	-0.01	NA	NA	NA
hsa-miR-340-5p	SOX9	0.0659434	0.776414	0.862275	0.223147	2.63408	4.55132e-05	NA	0.515	NA	NA
hsa-miR-340-5p	SIRT1	0.00161665	0.994451	0.945232	0.703658	2.63408	4.55132e-05	NA	0.718	NA	NA
hsa-miR-340-5p	BCL2	-0.00122406	0.995798	1.1389	0.259904	2.63408	4.55132e-05	NA	0.728	NA	NA
hsa-miR-340-5p	SMAD4	-0.0102	0.964999	1.08483	0.392856	2.63408	4.55132e-05	NA	0.879	PAR-CLIP	NA
hsa-miR-340-5p	MMP13	-0.022527	0.922788	0.895583	0.834042	2.63408	4.55132e-05	NA	0.863	NA	NA
hsa-miR-340-5p	TGFB1	-0.0950535	0.681918	0.887273	0.585925	2.63408	4.55132e-05	NA	NA	NA	NA
hsa-miR-340-5p	CHRDL1	-0.104682	0.65157	1.49435	0.292121	2.63408	4.55132e-05	NA	NA	NA	NA
hsa-miR-340-5p	CEBPB	-0.116235	0.615846	0.939753	0.736829	2.63408	4.55132e-05	NA	NA	NA	NA
hsa-miR-340-5p	IGFBP5	-0.199055	0.387021	1.29452	0.177581	2.63408	4.55132e-05	NA	0.527	NA	NA
hsa-miR-340-5p	ADAMTS5	-0.223644	0.329794	1.36417	0.016705	2.63408	4.55132e-05	-0.02	0.884	HITS-CLIP	NA
hsa-miR-340-5p	VEGFA	-0.248427	0.277539	1.17721	0.27403	2.63408	4.55132e-05	NA	0.502	NA	NA
hsa-miR-340-5p	SMAD2	-0.304694	0.179278	1.18533	0.0540127	2.63408	4.55132e-05	-0.02	0.978	NA	NA
hsa-miR-340-5p	COL2A1	-0.306116	0.177154	1.00858	0.986423	2.63408	4.55132e-05	NA	NA	NA	NA
hsa-miR-340-5p	GDF5	-0.451986	0.0396833	1.23117	0.309402	2.63408	4.55132e-05	NA	NA	NA	NA
hsa-miR-3615	BCL2	0.565118	0.00759724	1.1389	0.259904	0.750719	0.02993	NA	NA	NA	NA
hsa-miR-3615	SOX9	0.511059	0.0179006	0.862275	0.223147	0.750719	0.02993	NA	NA	NA	NA
hsa-miR-3615	CHRDL1	0.384876	0.0849222	1.49435	0.292121	0.750719	0.02993	NA	NA	NA	NA
hsa-miR-3615	COL2A1	0.372183	0.0966273	1.00858	0.986423	0.750719	0.02993	NA	NA	NA	NA
hsa-miR-3615	SIRT1	0.33878	0.133031	0.945232	0.703658	0.750719	0.02993	NA	NA	NA	NA
hsa-miR-3615	IGFBP5	0.268948	0.238444	1.29452	0.177581	0.750719	0.02993	NA	NA	NA	NA
hsa-miR-3615	ACVR2B	0.240733	0.293173	0.958292	0.798923	0.750719	0.02993	NA	NA	NA	NA
hsa-miR-3615	SMAD4	0.239788	0.29513	1.08483	0.392856	0.750719	0.02993	NA	NA	NA	NA
hsa-miR-3615	TGFB1	0.228935	0.318177	0.887273	0.585925	0.750719	0.02993	NA	NA	NA	NA
hsa-miR-3615	VEGFA	0.169525	0.462562	1.17721	0.27403	0.750719	0.02993	NA	NA	NA	NA
hsa-miR-3615	GDF5	0.0282918	0.903109	1.23117	0.309402	0.750719	0.02993	NA	NA	NA	NA
hsa-miR-3615	SMAD2	0.0278235	0.904706	1.18533	0.0540127	0.750719	0.02993	NA	NA	NA	NA
hsa-miR-3615	INPP5D	-0.0408046	0.860598	0.933643	0.71454	0.750719	0.02993	NA	NA	NA	NA
hsa-miR-3615	ADAMTS5	-0.171239	0.457981	1.36417	0.016705	0.750719	0.02993	NA	NA	NA	NA
hsa-miR-3615	MMP13	-0.237315	0.300288	0.895583	0.834042	0.750719	0.02993	NA	NA	NA	NA
hsa-miR-3615	GAS5	-0.26492	0.24582	1.0647	0.746685	0.750719	0.02993	NA	NA	NA	NA
hsa-miR-3615	CEBPB	-0.300681	0.185365	0.939753	0.736829	0.750719	0.02993	NA	NA	NA	NA
hsa-miR-3615	IL1B	-0.431966	0.050527	0.864069	0.884336	0.750719	0.02993	NA	NA	NA	NA
hsa-miR-361-5p	GAS5	0.307771	0.174706	1.0647	0.746685	1.88277	0.00796736	NA	NA	NA	NA
hsa-miR-361-5p	CHRDL1	0.216912	0.344935	1.49435	0.292121	1.88277	0.00796736	NA	NA	NA	NA
hsa-miR-361-5p	SOX9	0.126618	0.584435	0.862275	0.223147	1.88277	0.00796736	NA	NA	NA	NA
hsa-miR-361-5p	BCL2	0.120362	0.603281	1.1389	0.259904	1.88277	0.00796736	NA	NA	NA	NA
hsa-miR-361-5p	ACVR2B	0.0750386	0.746491	0.958292	0.798923	1.88277	0.00796736	NA	NA	NA	NA
hsa-miR-361-5p	INPP5D	0.0736868	0.750917	0.933643	0.71454	1.88277	0.00796736	NA	NA	NA	NA
hsa-miR-361-5p	SIRT1	0.017623	0.939563	0.945232	0.703658	1.88277	0.00796736	NA	NA	NA	NA
hsa-miR-361-5p	COL2A1	-0.0128088	0.956055	1.00858	0.986423	1.88277	0.00796736	NA	NA	NA	NA
hsa-miR-361-5p	SMAD4	-0.0424905	0.854896	1.08483	0.392856	1.88277	0.00796736	NA	NA	NA	NA
hsa-miR-361-5p	CEBPB	-0.057126	0.805717	0.939753	0.736829	1.88277	0.00796736	NA	NA	NA	NA
hsa-miR-361-5p	VEGFA	-0.071288	0.75879	1.17721	0.27403	1.88277	0.00796736	-0.329	NA	HITS-CLIP	qRT-PCR//Western blot
hsa-miR-361-5p	IL1B	-0.0830947	0.720275	0.864069	0.884336	1.88277	0.00796736	NA	NA	NA	NA
hsa-miR-361-5p	IGFBP5	-0.088035	0.704345	1.29452	0.177581	1.88277	0.00796736	NA	NA	NA	NA
hsa-miR-361-5p	MMP13	-0.129503	0.575831	0.895583	0.834042	1.88277	0.00796736	NA	NA	NA	NA
hsa-miR-361-5p	GDF5	-0.260165	0.254715	1.23117	0.309402	1.88277	0.00796736	NA	NA	NA	NA
hsa-miR-361-5p	SMAD2	-0.33171	0.14184	1.18533	0.0540127	1.88277	0.00796736	NA	NA	NA	HITS-CLIP
hsa-miR-361-5p	TGFB1	-0.342046	0.129096	0.887273	0.585925	1.88277	0.00796736	-0.182	NA	NA	NA
hsa-miR-361-5p	ADAMTS5	-0.372821	0.0960124	1.36417	0.016705	1.88277	0.00796736	NA	NA	NA	NA
hsa-miR-363-3p	CHRDL1	0.216871	0.345028	1.49435	0.292121	1.89704	0.00155755	NA	0.483	NA	NA
hsa-miR-363-3p	GAS5	0.197889	0.389865	1.0647	0.746685	1.89704	0.00155755	NA	NA	NA	NA
hsa-miR-363-3p	TGFB1	0.114105	0.622373	0.887273	0.585925	1.89704	0.00155755	NA	NA	NA	NA
hsa-miR-363-3p	IL1B	0.070716	0.760671	0.864069	0.884336	1.89704	0.00155755	NA	0.454	NA	NA
hsa-miR-363-3p	CEBPB	0.0689396	0.76652	0.939753	0.736829	1.89704	0.00155755	NA	0.46	NA	NA
hsa-miR-363-3p	SIRT1	0.0560413	0.80934	0.945232	0.703658	1.89704	0.00155755	NA	0.898	NA	NA
hsa-miR-363-3p	ADAMTS5	0.0410227	0.85986	1.36417	0.016705	1.89704	0.00155755	NA	0.931	NA	NA
hsa-miR-363-3p	INPP5D	0.026732	0.908429	0.933643	0.71454	1.89704	0.00155755	NA	NA	NA	NA
hsa-miR-363-3p	SOX9	0.0123385	0.957667	0.862275	0.223147	1.89704	0.00155755	NA	0.455	NA	NA
hsa-miR-363-3p	BCL2	-0.0547106	0.81379	1.1389	0.259904	1.89704	0.00155755	NA	0.559	NA	NA
hsa-miR-363-3p	SMAD4	-0.0914601	0.693369	1.08483	0.392856	1.89704	0.00155755	NA	0.992	NA	NA
hsa-miR-363-3p	IGFBP5	-0.091787	0.692325	1.29452	0.177581	1.89704	0.00155755	NA	0.988	NA	NA
hsa-miR-363-3p	ACVR2B	-0.0957665	0.679653	0.958292	0.798923	1.89704	0.00155755	NA	0.488	NA	NA
hsa-miR-363-3p	MMP13	-0.113674	0.623696	0.895583	0.834042	1.89704	0.00155755	NA	NA	NA	NA
hsa-miR-363-3p	COL2A1	-0.204564	0.373741	1.00858	0.986423	1.89704	0.00155755	NA	NA	NA	NA
hsa-miR-363-3p	VEGFA	-0.238067	0.298714	1.17721	0.27403	1.89704	0.00155755	NA	0.582	NA	NA
hsa-miR-363-3p	SMAD2	-0.249521	0.27536	1.18533	0.0540127	1.89704	0.00155755	NA	0.544	NA	NA
hsa-miR-363-3p	GDF5	-0.367633	0.101099	1.23117	0.309402	1.89704	0.00155755	NA	NA	NA	NA
hsa-miR-370-3p	IGFBP5	0.384246	0.085477	1.29452	0.177581	0.593841	0.00457186	NA	NA	NA	NA
hsa-miR-370-3p	ADAMTS5	0.333158	0.140003	1.36417	0.016705	0.593841	0.00457186	NA	NA	NA	NA
hsa-miR-370-3p	ACVR2B	0.32262	0.15376	0.958292	0.798923	0.593841	0.00457186	-0.02	NA	NA	NA
hsa-miR-370-3p	SMAD4	0.284364	0.21155	1.08483	0.392856	0.593841	0.00457186	NA	NA	NA	NA
hsa-miR-370-3p	SMAD2	0.27683	0.22443	1.18533	0.0540127	0.593841	0.00457186	NA	NA	HITS-CLIP	NA
hsa-miR-370-3p	INPP5D	0.232869	0.309702	0.933643	0.71454	0.593841	0.00457186	NA	NA	NA	NA
hsa-miR-370-3p	SIRT1	0.158159	0.493517	0.945232	0.703658	0.593841	0.00457186	NA	NA	NA	NA
hsa-miR-370-3p	MMP13	0.147407	0.523708	0.895583	0.834042	0.593841	0.00457186	NA	NA	NA	NA
hsa-miR-370-3p	COL2A1	0.112519	0.627249	1.00858	0.986423	0.593841	0.00457186	NA	NA	NA	NA
hsa-miR-370-3p	IL1B	0.0803994	0.729014	0.864069	0.884336	0.593841	0.00457186	NA	NA	NA	NA
hsa-miR-370-3p	CHRDL1	0.0664214	0.774833	1.49435	0.292121	0.593841	0.00457186	NA	NA	NA	NA
hsa-miR-370-3p	VEGFA	0.0551659	0.812267	1.17721	0.27403	0.593841	0.00457186	NA	NA	NA	NA
hsa-miR-370-3p	GDF5	0.0361039	0.876531	1.23117	0.309402	0.593841	0.00457186	NA	NA	NA	NA
hsa-miR-370-3p	SOX9	0.0296106	0.898615	0.862275	0.223147	0.593841	0.00457186	NA	NA	NA	NA
hsa-miR-370-3p	CEBPB	-0.0881088	0.704108	0.939753	0.736829	0.593841	0.00457186	NA	NA	NA	NA
hsa-miR-370-3p	TGFB1	-0.0892162	0.700553	0.887273	0.585925	0.593841	0.00457186	NA	NA	NA	NA
hsa-miR-370-3p	BCL2	-0.132926	0.565694	1.1389	0.259904	0.593841	0.00457186	NA	NA	NA	NA
hsa-miR-370-3p	GAS5	-0.300899	0.18503	1.0647	0.746685	0.593841	0.00457186	NA	NA	NA	NA
hsa-miR-374a-3p	INPP5D	0.262639	0.250062	0.933643	0.71454	2.52475	0.00179221	NA	NA	NA	NA
hsa-miR-374a-3p	GAS5	0.226025	0.324535	1.0647	0.746685	2.52475	0.00179221	NA	NA	NA	NA
hsa-miR-374a-3p	SOX9	0.126349	0.585243	0.862275	0.223147	2.52475	0.00179221	NA	NA	NA	NA
hsa-miR-374a-3p	ACVR2B	0.112701	0.626689	0.958292	0.798923	2.52475	0.00179221	NA	NA	NA	NA
hsa-miR-374a-3p	CHRDL1	0.0511949	0.825573	1.49435	0.292121	2.52475	0.00179221	NA	NA	NA	NA
hsa-miR-374a-3p	SIRT1	0.0380068	0.870075	0.945232	0.703658	2.52475	0.00179221	NA	0.453	NA	NA
hsa-miR-374a-3p	BCL2	0.0358034	0.877551	1.1389	0.259904	2.52475	0.00179221	NA	NA	NA	NA
hsa-miR-374a-3p	IL1B	0.0263742	0.90965	0.864069	0.884336	2.52475	0.00179221	NA	NA	NA	NA
hsa-miR-374a-3p	SMAD4	-0.00627424	0.978466	1.08483	0.392856	2.52475	0.00179221	NA	0.546	NA	NA
hsa-miR-374a-3p	MMP13	-0.0789861	0.733609	0.895583	0.834042	2.52475	0.00179221	NA	NA	NA	NA
hsa-miR-374a-3p	CEBPB	-0.110917	0.632191	0.939753	0.736829	2.52475	0.00179221	NA	0.451	NA	NA
hsa-miR-374a-3p	IGFBP5	-0.129754	0.575086	1.29452	0.177581	2.52475	0.00179221	NA	NA	NA	NA
hsa-miR-374a-3p	TGFB1	-0.150274	0.515575	0.887273	0.585925	2.52475	0.00179221	NA	NA	NA	NA
hsa-miR-374a-3p	SMAD2	-0.193979	0.399487	1.18533	0.0540127	2.52475	0.00179221	NA	0.632	NA	HITS-CLIP
hsa-miR-374a-3p	VEGFA	-0.216768	0.345263	1.17721	0.27403	2.52475	0.00179221	NA	0.742	HITS-CLIP	NA
hsa-miR-374a-3p	COL2A1	-0.237888	0.299089	1.00858	0.986423	2.52475	0.00179221	NA	NA	NA	NA
hsa-miR-374a-3p	ADAMTS5	-0.314484	0.165006	1.36417	0.016705	2.52475	0.00179221	NA	0.51	NA	NA
hsa-miR-374a-3p	GDF5	-0.462328	0.0348431	1.23117	0.309402	2.52475	0.00179221	NA	NA	NA	NA
hsa-miR-374a-5p	ACVR2B	0.263203	0.249009	0.958292	0.798923	2.2909	0.0243755	-0.114	NA	HITS-CLIP	PAR-CLIP
hsa-miR-374a-5p	INPP5D	0.24273	0.289065	0.933643	0.71454	2.2909	0.0243755	NA	NA	NA	NA
hsa-miR-374a-5p	SOX9	0.201687	0.380644	0.862275	0.223147	2.2909	0.0243755	NA	NA	NA	NA
hsa-miR-374a-5p	SMAD4	0.177045	0.442644	1.08483	0.392856	2.2909	0.0243755	NA	NA	NA	NA
hsa-miR-374a-5p	GAS5	0.149886	0.516672	1.0647	0.746685	2.2909	0.0243755	NA	NA	NA	NA
hsa-miR-374a-5p	BCL2	0.0969207	0.675994	1.1389	0.259904	2.2909	0.0243755	NA	0.718	NA	NA
hsa-miR-374a-5p	SIRT1	0.0943419	0.68418	0.945232	0.703658	2.2909	0.0243755	NA	NA	NA	NA
hsa-miR-374a-5p	CHRDL1	0.0580191	0.802737	1.49435	0.292121	2.2909	0.0243755	NA	0.617	NA	NA
hsa-miR-374a-5p	IGFBP5	-0.0174356	0.940204	1.29452	0.177581	2.2909	0.0243755	NA	0.543	HITS-CLIP	NA
hsa-miR-374a-5p	IL1B	-0.0282733	0.903173	0.864069	0.884336	2.2909	0.0243755	NA	NA	NA	NA
hsa-miR-374a-5p	CEBPB	-0.0604442	0.794658	0.939753	0.736829	2.2909	0.0243755	-0.219	0.968	NA	Luciferase reporter assay
hsa-miR-374a-5p	MMP13	-0.136013	0.556623	0.895583	0.834042	2.2909	0.0243755	NA	0.659	NA	NA
hsa-miR-374a-5p	COL2A1	-0.146941	0.525038	1.00858	0.986423	2.2909	0.0243755	NA	NA	NA	NA
hsa-miR-374a-5p	TGFB1	-0.19883	0.387569	0.887273	0.585925	2.2909	0.0243755	NA	NA	NA	NA
hsa-miR-374a-5p	SMAD2	-0.204226	0.374547	1.18533	0.0540127	2.2909	0.0243755	NA	0.879	NA	NA
hsa-miR-374a-5p	VEGFA	-0.248667	0.27706	1.17721	0.27403	2.2909	0.0243755	NA	0.508	NA	PAR-CLIP
hsa-miR-374a-5p	ADAMTS5	-0.304267	0.17992	1.36417	0.016705	2.2909	0.0243755	-0.03	0.632	NA	NA
hsa-miR-374a-5p	GDF5	-0.433713	0.0494985	1.23117	0.309402	2.2909	0.0243755	NA	NA	NA	NA
hsa-miR-374b-5p	GAS5	0.409386	0.0653449	1.0647	0.746685	2.57738	0.0027599	NA	NA	NA	NA
hsa-miR-374b-5p	IL1B	0.153896	0.505385	0.864069	0.884336	2.57738	0.0027599	NA	NA	NA	NA
hsa-miR-374b-5p	INPP5D	0.139398	0.546749	0.933643	0.71454	2.57738	0.0027599	NA	NA	NA	NA
hsa-miR-374b-5p	CEBPB	0.030948	0.89406	0.939753	0.736829	2.57738	0.0027599	-0.229	0.961	NA	NA
hsa-miR-374b-5p	MMP13	0.0127585	0.956227	0.895583	0.834042	2.57738	0.0027599	NA	0.558	NA	NA
hsa-miR-374b-5p	SOX9	-0.0125841	0.956825	0.862275	0.223147	2.57738	0.0027599	NA	NA	NA	NA
hsa-miR-374b-5p	CHRDL1	-0.049218	0.832215	1.49435	0.292121	2.57738	0.0027599	NA	0.689	NA	NA
hsa-miR-374b-5p	BCL2	-0.0721033	0.756112	1.1389	0.259904	2.57738	0.0027599	NA	0.652	PAR-CLIP	NA
hsa-miR-374b-5p	ACVR2B	-0.109211	0.637472	0.958292	0.798923	2.57738	0.0027599	-0.142	NA	PAR-CLIP	PAR-CLIP
hsa-miR-374b-5p	SIRT1	-0.166097	0.471792	0.945232	0.703658	2.57738	0.0027599	NA	0.601	NA	NA
hsa-miR-374b-5p	TGFB1	-0.221244	0.335145	0.887273	0.585925	2.57738	0.0027599	NA	NA	NA	NA
hsa-miR-374b-5p	SMAD4	-0.228372	0.319402	1.08483	0.392856	2.57738	0.0027599	NA	0.56	NA	NA
hsa-miR-374b-5p	VEGFA	-0.25424	0.266082	1.17721	0.27403	2.57738	0.0027599	NA	0.695	NA	PAR-CLIP
hsa-miR-374b-5p	COL2A1	-0.275058	0.227533	1.00858	0.986423	2.57738	0.0027599	NA	NA	NA	NA
hsa-miR-374b-5p	IGFBP5	-0.35492	0.114392	1.29452	0.177581	2.57738	0.0027599	NA	NA	NA	NA
hsa-miR-374b-5p	GDF5	-0.374372	0.0945286	1.23117	0.309402	2.57738	0.0027599	NA	NA	NA	NA
hsa-miR-374b-5p	SMAD2	-0.389549	0.0808896	1.18533	0.0540127	2.57738	0.0027599	NA	0.811	NA	NA
hsa-miR-374b-5p	ADAMTS5	-0.405166	0.0684454	1.36417	0.016705	2.57738	0.0027599	-0.03	0.78	NA	NA
hsa-miR-382-5p	ACVR2B	0.496648	0.0220082	0.958292	0.798923	0.694507	0.00388011	NA	NA	NA	NA
hsa-miR-382-5p	IGFBP5	0.484956	0.0258656	1.29452	0.177581	0.694507	0.00388011	-0.085	NA	NA	NA
hsa-miR-382-5p	SMAD4	0.363911	0.104867	1.08483	0.392856	0.694507	0.00388011	NA	NA	NA	NA
hsa-miR-382-5p	INPP5D	0.306152	0.177102	0.933643	0.71454	0.694507	0.00388011	NA	NA	NA	NA
hsa-miR-382-5p	SMAD2	0.251024	0.272382	1.18533	0.0540127	0.694507	0.00388011	NA	NA	NA	NA
hsa-miR-382-5p	SIRT1	0.224946	0.326913	0.945232	0.703658	0.694507	0.00388011	NA	NA	NA	NA
hsa-miR-382-5p	ADAMTS5	0.21381	0.352046	1.36417	0.016705	0.694507	0.00388011	NA	NA	NA	NA
hsa-miR-382-5p	IL1B	0.0875347	0.705953	0.864069	0.884336	0.694507	0.00388011	NA	NA	NA	NA
hsa-miR-382-5p	SOX9	0.0826029	0.721867	0.862275	0.223147	0.694507	0.00388011	NA	NA	NA	NA
hsa-miR-382-5p	MMP13	0.071233	0.758971	0.895583	0.834042	0.694507	0.00388011	NA	NA	NA	NA
hsa-miR-382-5p	CHRDL1	0.0648793	0.779936	1.49435	0.292121	0.694507	0.00388011	NA	NA	NA	NA
hsa-miR-382-5p	COL2A1	0.0296152	0.898599	1.00858	0.986423	0.694507	0.00388011	NA	NA	NA	NA
hsa-miR-382-5p	GDF5	0.0108414	0.9628	1.23117	0.309402	0.694507	0.00388011	NA	NA	NA	NA
hsa-miR-382-5p	VEGFA	-0.00498026	0.982907	1.17721	0.27403	0.694507	0.00388011	NA	NA	NA	NA
hsa-miR-382-5p	BCL2	-0.112248	0.628085	1.1389	0.259904	0.694507	0.00388011	NA	NA	NA	NA
hsa-miR-382-5p	TGFB1	-0.13706	0.553558	0.887273	0.585925	0.694507	0.00388011	NA	NA	NA	NA
hsa-miR-382-5p	CEBPB	-0.164866	0.47513	0.939753	0.736829	0.694507	0.00388011	NA	NA	NA	NA
hsa-miR-382-5p	GAS5	-0.328035	0.146578	1.0647	0.746685	0.694507	0.00388011	NA	NA	NA	NA
hsa-miR-3934-5p	INPP5D	0.368546	0.10019	0.933643	0.71454	1.94795	4.21803e-05	NA	NA	NA	NA
hsa-miR-3934-5p	SOX9	0.313306	0.166681	0.862275	0.223147	1.94795	4.21803e-05	NA	NA	NA	NA
hsa-miR-3934-5p	CHRDL1	0.294663	0.194752	1.49435	0.292121	1.94795	4.21803e-05	NA	NA	NA	NA
hsa-miR-3934-5p	ACVR2B	0.244291	0.285879	0.958292	0.798923	1.94795	4.21803e-05	NA	NA	NA	NA
hsa-miR-3934-5p	COL2A1	0.233612	0.308117	1.00858	0.986423	1.94795	4.21803e-05	NA	NA	NA	NA
hsa-miR-3934-5p	SIRT1	0.220464	0.336897	0.945232	0.703658	1.94795	4.21803e-05	NA	NA	NA	NA
hsa-miR-3934-5p	IGFBP5	0.20514	0.372368	1.29452	0.177581	1.94795	4.21803e-05	NA	NA	NA	HITS-CLIP
hsa-miR-3934-5p	SMAD4	0.203026	0.377423	1.08483	0.392856	1.94795	4.21803e-05	NA	NA	NA	NA
hsa-miR-3934-5p	SMAD2	0.156799	0.497288	1.18533	0.0540127	1.94795	4.21803e-05	NA	NA	NA	NA
hsa-miR-3934-5p	BCL2	0.0964799	0.677391	1.1389	0.259904	1.94795	4.21803e-05	NA	NA	NA	NA
hsa-miR-3934-5p	VEGFA	0.0930996	0.688136	1.17721	0.27403	1.94795	4.21803e-05	NA	NA	NA	NA
hsa-miR-3934-5p	MMP13	0.0559421	0.809672	0.895583	0.834042	1.94795	4.21803e-05	NA	NA	NA	NA
hsa-miR-3934-5p	ADAMTS5	0.0449917	0.84645	1.36417	0.016705	1.94795	4.21803e-05	NA	NA	NA	NA
hsa-miR-3934-5p	IL1B	-0.116558	0.614859	0.864069	0.884336	1.94795	4.21803e-05	NA	NA	NA	NA
hsa-miR-3934-5p	CEBPB	-0.12065	0.602407	0.939753	0.736829	1.94795	4.21803e-05	NA	NA	NA	NA
hsa-miR-3934-5p	GDF5	-0.162254	0.48225	1.23117	0.309402	1.94795	4.21803e-05	NA	NA	NA	NA
hsa-miR-3934-5p	GAS5	-0.227238	0.321876	1.0647	0.746685	1.94795	4.21803e-05	NA	NA	NA	NA
hsa-miR-3934-5p	TGFB1	-0.288754	0.204276	0.887273	0.585925	1.94795	4.21803e-05	NA	NA	NA	NA
hsa-miR-409-3p	ADAMTS5	0.427029	0.0535211	1.36417	0.016705	0.717323	0.0181557	-0.03	0.686	NA	NA
hsa-miR-409-3p	INPP5D	0.352597	0.116951	0.933643	0.71454	0.717323	0.0181557	NA	NA	NA	NA
hsa-miR-409-3p	IGFBP5	0.32287	0.153424	1.29452	0.177581	0.717323	0.0181557	NA	NA	NA	NA
hsa-miR-409-3p	SMAD4	0.297791	0.189835	1.08483	0.392856	0.717323	0.0181557	NA	0.533	NA	NA
hsa-miR-409-3p	IL1B	0.289927	0.202361	0.864069	0.884336	0.717323	0.0181557	NA	NA	NA	NA
hsa-miR-409-3p	ACVR2B	0.280088	0.218799	0.958292	0.798923	0.717323	0.0181557	-0.02	NA	NA	NA
hsa-miR-409-3p	SMAD2	0.213867	0.351915	1.18533	0.0540127	0.717323	0.0181557	NA	0.852	NA	NA
hsa-miR-409-3p	MMP13	0.15627	0.49876	0.895583	0.834042	0.717323	0.0181557	NA	NA	NA	NA
hsa-miR-409-3p	CHRDL1	0.138416	0.549604	1.49435	0.292121	0.717323	0.0181557	NA	NA	NA	NA
hsa-miR-409-3p	CEBPB	0.00720018	0.975289	0.939753	0.736829	0.717323	0.0181557	NA	NA	NA	NA
hsa-miR-409-3p	TGFB1	-0.00407526	0.986012	0.887273	0.585925	0.717323	0.0181557	NA	NA	NA	NA
hsa-miR-409-3p	SIRT1	-0.0359387	0.877092	0.945232	0.703658	0.717323	0.0181557	NA	0.602	NA	NA
hsa-miR-409-3p	COL2A1	-0.0961722	0.678366	1.00858	0.986423	0.717323	0.0181557	NA	NA	NA	NA
hsa-miR-409-3p	GDF5	-0.126607	0.58447	1.23117	0.309402	0.717323	0.0181557	NA	NA	NA	NA
hsa-miR-409-3p	GAS5	-0.168915	0.464197	1.0647	0.746685	0.717323	0.0181557	NA	NA	NA	NA
hsa-miR-409-3p	VEGFA	-0.190977	0.406962	1.17721	0.27403	0.717323	0.0181557	NA	NA	NA	NA
hsa-miR-409-3p	SOX9	-0.303291	0.18139	0.862275	0.223147	0.717323	0.0181557	NA	0.496	NA	NA
hsa-miR-409-3p	BCL2	-0.329649	0.144483	1.1389	0.259904	0.717323	0.0181557	NA	0.612	NA	NA
hsa-miR-409-5p	ACVR2B	0.509776	0.0182391	0.958292	0.798923	0.65667	0.00614847	-0.138	NA	NA	NA
hsa-miR-409-5p	SMAD4	0.498316	0.0214973	1.08483	0.392856	0.65667	0.00614847	NA	NA	NA	NA
hsa-miR-409-5p	IGFBP5	0.366188	0.10255	1.29452	0.177581	0.65667	0.00614847	NA	NA	NA	NA
hsa-miR-409-5p	INPP5D	0.293184	0.197108	0.933643	0.71454	0.65667	0.00614847	NA	NA	NA	NA
hsa-miR-409-5p	CHRDL1	0.283154	0.213585	1.49435	0.292121	0.65667	0.00614847	NA	NA	NA	NA
hsa-miR-409-5p	SIRT1	0.098267	0.671734	0.945232	0.703658	0.65667	0.00614847	NA	NA	NA	NA
hsa-miR-409-5p	ADAMTS5	0.0471344	0.839227	1.36417	0.016705	0.65667	0.00614847	NA	NA	NA	NA
hsa-miR-409-5p	CEBPB	-0.00270846	0.990704	0.939753	0.736829	0.65667	0.00614847	NA	NA	NA	NA
hsa-miR-409-5p	SOX9	-0.0212525	0.927145	0.862275	0.223147	0.65667	0.00614847	NA	NA	NA	NA
hsa-miR-409-5p	GAS5	-0.0387583	0.867528	1.0647	0.746685	0.65667	0.00614847	NA	NA	NA	NA
hsa-miR-409-5p	IL1B	-0.0423058	0.85552	0.864069	0.884336	0.65667	0.00614847	NA	NA	NA	NA
hsa-miR-409-5p	BCL2	-0.065797	0.776898	1.1389	0.259904	0.65667	0.00614847	NA	NA	NA	NA
hsa-miR-409-5p	COL2A1	-0.0659908	0.776257	1.00858	0.986423	0.65667	0.00614847	NA	NA	NA	NA
hsa-miR-409-5p	TGFB1	-0.0883714	0.703264	0.887273	0.585925	0.65667	0.00614847	NA	NA	NA	NA
hsa-miR-409-5p	GDF5	-0.103086	0.656566	1.23117	0.309402	0.65667	0.00614847	NA	NA	NA	NA
hsa-miR-409-5p	SMAD2	-0.103127	0.656436	1.18533	0.0540127	0.65667	0.00614847	NA	NA	NA	NA
hsa-miR-409-5p	MMP13	-0.111387	0.630742	0.895583	0.834042	0.65667	0.00614847	NA	NA	NA	NA
hsa-miR-409-5p	VEGFA	-0.293698	0.196287	1.17721	0.27403	0.65667	0.00614847	NA	NA	HITS-CLIP	NA
hsa-miR-421	SOX9	0.310218	0.171127	0.862275	0.223147	1.68676	0.0225148	NA	NA	NA	NA
hsa-miR-421	INPP5D	0.236863	0.301237	0.933643	0.71454	1.68676	0.0225148	NA	NA	NA	NA
hsa-miR-421	CHRDL1	0.221868	0.333749	1.49435	0.292121	1.68676	0.0225148	NA	NA	NA	NA
hsa-miR-421	BCL2	0.210583	0.359533	1.1389	0.259904	1.68676	0.0225148	NA	NA	NA	NA
hsa-miR-421	SMAD4	0.173732	0.451364	1.08483	0.392856	1.68676	0.0225148	NA	NA	NA	Luciferase reporter assay//qRT-PCR//Western blot
hsa-miR-421	ACVR2B	0.152361	0.509691	0.958292	0.798923	1.68676	0.0225148	NA	NA	HITS-CLIP	NA
hsa-miR-421	SIRT1	0.139684	0.545918	0.945232	0.703658	1.68676	0.0225148	NA	NA	HITS-CLIP	NA
hsa-miR-421	GAS5	0.11058	0.633235	1.0647	0.746685	1.68676	0.0225148	NA	NA	NA	NA
hsa-miR-421	COL2A1	0.0256432	0.912145	1.00858	0.986423	1.68676	0.0225148	NA	NA	NA	NA
hsa-miR-421	IGFBP5	0.00142753	0.9951	1.29452	0.177581	1.68676	0.0225148	NA	NA	NA	NA
hsa-miR-421	IL1B	-0.0678595	0.770083	0.864069	0.884336	1.68676	0.0225148	NA	NA	NA	NA
hsa-miR-421	SMAD2	-0.0892176	0.700549	1.18533	0.0540127	1.68676	0.0225148	NA	NA	HITS-CLIP	NA
hsa-miR-421	CEBPB	-0.10912	0.637755	0.939753	0.736829	1.68676	0.0225148	NA	NA	PAR-CLIP	Sequencing
hsa-miR-421	MMP13	-0.151694	0.511569	0.895583	0.834042	1.68676	0.0225148	NA	NA	NA	NA
hsa-miR-421	VEGFA	-0.196614	0.392987	1.17721	0.27403	1.68676	0.0225148	NA	NA	NA	NA
hsa-miR-421	TGFB1	-0.296	0.192639	0.887273	0.585925	1.68676	0.0225148	NA	NA	NA	NA
hsa-miR-421	ADAMTS5	-0.370573	0.0981929	1.36417	0.016705	1.68676	0.0225148	NA	NA	NA	NA
hsa-miR-421	GDF5	-0.456421	0.0375474	1.23117	0.309402	1.68676	0.0225148	NA	NA	NA	NA
hsa-miR-423-3p	SMAD2	0.475578	0.0293318	1.18533	0.0540127	0.672442	0.000994222	NA	NA	NA	NA
hsa-miR-423-3p	IGFBP5	0.415702	0.060905	1.29452	0.177581	0.672442	0.000994222	NA	NA	NA	NA
hsa-miR-423-3p	SIRT1	0.339097	0.132646	0.945232	0.703658	0.672442	0.000994222	NA	NA	NA	NA
hsa-miR-423-3p	SMAD4	0.322816	0.153496	1.08483	0.392856	0.672442	0.000994222	NA	NA	NA	NA
hsa-miR-423-3p	ACVR2B	0.309964	0.171494	0.958292	0.798923	0.672442	0.000994222	NA	NA	NA	NA
hsa-miR-423-3p	SOX9	0.302994	0.18184	0.862275	0.223147	0.672442	0.000994222	NA	NA	NA	NA
hsa-miR-423-3p	COL2A1	0.280014	0.218926	1.00858	0.986423	0.672442	0.000994222	NA	NA	NA	NA
hsa-miR-423-3p	BCL2	0.269372	0.237677	1.1389	0.259904	0.672442	0.000994222	NA	NA	NA	NA
hsa-miR-423-3p	VEGFA	0.251399	0.271643	1.17721	0.27403	0.672442	0.000994222	NA	NA	PAR-CLIP	PAR-CLIP//HITS-CLIP
hsa-miR-423-3p	TGFB1	0.224914	0.326982	0.887273	0.585925	0.672442	0.000994222	NA	NA	NA	NA
hsa-miR-423-3p	ADAMTS5	0.195128	0.396646	1.36417	0.016705	0.672442	0.000994222	NA	NA	NA	NA
hsa-miR-423-3p	CHRDL1	0.171401	0.457551	1.49435	0.292121	0.672442	0.000994222	NA	NA	NA	NA
hsa-miR-423-3p	GDF5	0.113272	0.624932	1.23117	0.309402	0.672442	0.000994222	NA	NA	NA	NA
hsa-miR-423-3p	INPP5D	0.0351591	0.879739	0.933643	0.71454	0.672442	0.000994222	NA	NA	NA	NA
hsa-miR-423-3p	MMP13	-0.0382234	0.869341	0.895583	0.834042	0.672442	0.000994222	NA	NA	NA	NA
hsa-miR-423-3p	CEBPB	-0.233651	0.308032	0.939753	0.736829	0.672442	0.000994222	NA	NA	NA	NA
hsa-miR-423-3p	IL1B	-0.264676	0.246271	0.864069	0.884336	0.672442	0.000994222	NA	NA	NA	NA
hsa-miR-423-3p	GAS5	-0.457192	0.0371853	1.0647	0.746685	0.672442	0.000994222	NA	NA	NA	NA
hsa-miR-433-3p	ACVR2B	0.528398	0.0137999	0.958292	0.798923	0.673827	0.0440533	NA	NA	NA	NA
hsa-miR-433-3p	SIRT1	0.42243	0.0564317	0.945232	0.703658	0.673827	0.0440533	NA	NA	NA	NA
hsa-miR-433-3p	SMAD4	0.412376	0.0632137	1.08483	0.392856	0.673827	0.0440533	NA	NA	NA	NA
hsa-miR-433-3p	IGFBP5	0.387894	0.0823012	1.29452	0.177581	0.673827	0.0440533	NA	NA	NA	NA
hsa-miR-433-3p	SOX9	0.349077	0.120907	0.862275	0.223147	0.673827	0.0440533	NA	NA	NA	NA
hsa-miR-433-3p	INPP5D	0.307744	0.174745	0.933643	0.71454	0.673827	0.0440533	NA	NA	NA	NA
hsa-miR-433-3p	CHRDL1	0.143264	0.535568	1.49435	0.292121	0.673827	0.0440533	NA	NA	NA	NA
hsa-miR-433-3p	BCL2	0.128745	0.578088	1.1389	0.259904	0.673827	0.0440533	NA	NA	NA	NA
hsa-miR-433-3p	SMAD2	0.112017	0.628797	1.18533	0.0540127	0.673827	0.0440533	-0.192	NA	NA	NA
hsa-miR-433-3p	ADAMTS5	0.0988529	0.669883	1.36417	0.016705	0.673827	0.0440533	NA	NA	NA	NA
hsa-miR-433-3p	COL2A1	-0.0146651	0.949693	1.00858	0.986423	0.673827	0.0440533	NA	NA	NA	NA
hsa-miR-433-3p	VEGFA	-0.0296817	0.898373	1.17721	0.27403	0.673827	0.0440533	NA	NA	NA	NA
hsa-miR-433-3p	MMP13	-0.0814196	0.725702	0.895583	0.834042	0.673827	0.0440533	NA	NA	NA	NA
hsa-miR-433-3p	TGFB1	-0.0969126	0.676019	0.887273	0.585925	0.673827	0.0440533	NA	NA	NA	NA
hsa-miR-433-3p	IL1B	-0.154957	0.502418	0.864069	0.884336	0.673827	0.0440533	NA	NA	NA	NA
hsa-miR-433-3p	GDF5	-0.184441	0.423502	1.23117	0.309402	0.673827	0.0440533	NA	NA	NA	NA
hsa-miR-433-3p	CEBPB	-0.308712	0.173323	0.939753	0.736829	0.673827	0.0440533	NA	NA	NA	NA
hsa-miR-433-3p	GAS5	-0.343454	0.127425	1.0647	0.746685	0.673827	0.0440533	NA	NA	NA	NA
hsa-miR-4429	SIRT1	0.500725	0.0207766	0.945232	0.703658	0.584587	0.0280096	NA	NA	NA	NA
hsa-miR-4429	IGFBP5	0.483467	0.0263932	1.29452	0.177581	0.584587	0.0280096	NA	0.566	NA	NA
hsa-miR-4429	SOX9	0.479802	0.0277279	0.862275	0.223147	0.584587	0.0280096	NA	0.739	NA	NA
hsa-miR-4429	ACVR2B	0.46369	0.034242	0.958292	0.798923	0.584587	0.0280096	NA	NA	HITS-CLIP	NA
hsa-miR-4429	BCL2	0.405707	0.0680417	1.1389	0.259904	0.584587	0.0280096	NA	0.621	NA	NA
hsa-miR-4429	SMAD4	0.35368	0.115752	1.08483	0.392856	0.584587	0.0280096	NA	0.754	NA	NA
hsa-miR-4429	CHRDL1	0.3428	0.128199	1.49435	0.292121	0.584587	0.0280096	NA	NA	NA	NA
hsa-miR-4429	SMAD2	0.268758	0.23879	1.18533	0.0540127	0.584587	0.0280096	NA	0.552	NA	NA
hsa-miR-4429	VEGFA	0.268406	0.239428	1.17721	0.27403	0.584587	0.0280096	NA	NA	NA	NA
hsa-miR-4429	COL2A1	0.241891	0.290786	1.00858	0.986423	0.584587	0.0280096	NA	NA	NA	NA
hsa-miR-4429	INPP5D	0.0344858	0.882027	0.933643	0.71454	0.584587	0.0280096	NA	NA	NA	NA
hsa-miR-4429	ADAMTS5	-0.0080625	0.972331	1.36417	0.016705	0.584587	0.0280096	NA	0.793	NA	NA
hsa-miR-4429	GDF5	-0.0283243	0.902999	1.23117	0.309402	0.584587	0.0280096	NA	0.47	NA	NA
hsa-miR-4429	TGFB1	-0.131088	0.571129	0.887273	0.585925	0.584587	0.0280096	NA	NA	NA	NA
hsa-miR-4429	MMP13	-0.157224	0.49611	0.895583	0.834042	0.584587	0.0280096	NA	NA	NA	NA
hsa-miR-4429	GAS5	-0.303058	0.181743	1.0647	0.746685	0.584587	0.0280096	NA	NA	NA	NA
hsa-miR-4429	IL1B	-0.351371	0.118318	0.864069	0.884336	0.584587	0.0280096	NA	NA	NA	NA
hsa-miR-4429	CEBPB	-0.371716	0.0970796	0.939753	0.736829	0.584587	0.0280096	NA	NA	NA	NA
hsa-miR-451a	GAS5	0.347561	0.122641	1.0647	0.746685	2.2793	1.10448e-06	NA	NA	NA	NA
hsa-miR-451a	CEBPB	0.275224	0.227241	0.939753	0.736829	2.2793	1.10448e-06	NA	NA	NA	NA
hsa-miR-451a	IL1B	0.230845	0.314045	0.864069	0.884336	2.2793	1.10448e-06	NA	NA	NA	NA
hsa-miR-451a	MMP13	0.0634422	0.784698	0.895583	0.834042	2.2793	1.10448e-06	NA	NA	NA	NA
hsa-miR-451a	ADAMTS5	0.0566267	0.807385	1.36417	0.016705	2.2793	1.10448e-06	NA	NA	NA	NA
hsa-miR-451a	CHRDL1	0.0273316	0.906384	1.49435	0.292121	2.2793	1.10448e-06	NA	NA	NA	NA
hsa-miR-451a	TGFB1	0.00444162	0.984755	0.887273	0.585925	2.2793	1.10448e-06	NA	NA	NA	NA
hsa-miR-451a	INPP5D	-0.0374313	0.872027	0.933643	0.71454	2.2793	1.10448e-06	NA	NA	NA	NA
hsa-miR-451a	SOX9	-0.131055	0.571227	0.862275	0.223147	2.2793	1.10448e-06	NA	NA	NA	NA
hsa-miR-451a	SIRT1	-0.13955	0.546307	0.945232	0.703658	2.2793	1.10448e-06	NA	NA	NA	NA
hsa-miR-451a	ACVR2B	-0.180028	0.434868	0.958292	0.798923	2.2793	1.10448e-06	NA	NA	NA	NA
hsa-miR-451a	GDF5	-0.225016	0.326759	1.23117	0.309402	2.2793	1.10448e-06	NA	NA	NA	NA
hsa-miR-451a	VEGFA	-0.225072	0.326634	1.17721	0.27403	2.2793	1.10448e-06	NA	NA	NA	NA
hsa-miR-451a	BCL2	-0.271456	0.233926	1.1389	0.259904	2.2793	1.10448e-06	NA	NA	NA	qRT-PCR//Western blot
hsa-miR-451a	IGFBP5	-0.278849	0.22093	1.29452	0.177581	2.2793	1.10448e-06	NA	NA	NA	NA
hsa-miR-451a	SMAD4	-0.282385	0.214884	1.08483	0.392856	2.2793	1.10448e-06	NA	NA	NA	NA
hsa-miR-451a	COL2A1	-0.300501	0.185641	1.00858	0.986423	2.2793	1.10448e-06	NA	NA	NA	NA
hsa-miR-451a	SMAD2	-0.472847	0.0304075	1.18533	0.0540127	2.2793	1.10448e-06	NA	NA	NA	NA
hsa-miR-455-3p	COL2A1	0.266991	0.242011	1.00858	0.986423	0.684577	0.0223927	NA	0.504	NA	NA
hsa-miR-455-3p	GDF5	0.200721	0.382978	1.23117	0.309402	0.684577	0.0223927	NA	NA	NA	NA
hsa-miR-455-3p	CHRDL1	0.197734	0.390244	1.49435	0.292121	0.684577	0.0223927	NA	0.849	NA	In situ hybridization//qRT-PCR
hsa-miR-455-3p	ACVR2B	0.184309	0.423838	0.958292	0.798923	0.684577	0.0223927	NA	NA	NA	In situ hybridization//qRT-PCR
hsa-miR-455-3p	INPP5D	0.17951	0.436213	0.933643	0.71454	0.684577	0.0223927	NA	NA	NA	NA
hsa-miR-455-3p	SMAD4	0.14154	0.540542	1.08483	0.392856	0.684577	0.0223927	NA	0.471	NA	NA
hsa-miR-455-3p	CEBPB	0.134098	0.562244	0.939753	0.736829	0.684577	0.0223927	NA	NA	NA	NA
hsa-miR-455-3p	IGFBP5	0.125118	0.588931	1.29452	0.177581	0.684577	0.0223927	NA	NA	NA	NA
hsa-miR-455-3p	IL1B	0.103089	0.656554	0.864069	0.884336	0.684577	0.0223927	NA	0.553	NA	NA
hsa-miR-455-3p	BCL2	0.0782017	0.736164	1.1389	0.259904	0.684577	0.0223927	NA	NA	NA	NA
hsa-miR-455-3p	GAS5	0.0525833	0.820915	1.0647	0.746685	0.684577	0.0223927	NA	NA	NA	NA
hsa-miR-455-3p	MMP13	0.0479153	0.836597	0.895583	0.834042	0.684577	0.0223927	NA	NA	NA	NA
hsa-miR-455-3p	SOX9	-0.0146169	0.949859	0.862275	0.223147	0.684577	0.0223927	NA	NA	NA	NA
hsa-miR-455-3p	VEGFA	-0.0626733	0.78725	1.17721	0.27403	0.684577	0.0223927	NA	NA	NA	NA
hsa-miR-455-3p	TGFB1	-0.0924701	0.690144	0.887273	0.585925	0.684577	0.0223927	NA	NA	NA	NA
hsa-miR-455-3p	SMAD2	-0.153467	0.506586	1.18533	0.0540127	0.684577	0.0223927	NA	0.901	NA	In situ hybridization//qRT-PCR
hsa-miR-455-3p	ADAMTS5	-0.220785	0.336175	1.36417	0.016705	0.684577	0.0223927	NA	NA	NA	NA
hsa-miR-455-3p	SIRT1	-0.24207	0.290419	0.945232	0.703658	0.684577	0.0223927	NA	0.763	HITS-CLIP	NA
hsa-miR-4791	INPP5D	0.462617	0.0347147	0.933643	0.71454	2.15633	0.00912096	NA	NA	NA	NA
hsa-miR-4791	ACVR2B	0.233836	0.30764	0.958292	0.798923	2.15633	0.00912096	NA	NA	NA	NA
hsa-miR-4791	SMAD4	0.210508	0.359709	1.08483	0.392856	2.15633	0.00912096	NA	NA	NA	NA
hsa-miR-4791	IL1B	0.161246	0.485012	0.864069	0.884336	2.15633	0.00912096	NA	NA	NA	NA
hsa-miR-4791	CHRDL1	0.14172	0.54002	1.49435	0.292121	2.15633	0.00912096	NA	NA	NA	NA
hsa-miR-4791	GAS5	0.0769169	0.740353	1.0647	0.746685	2.15633	0.00912096	NA	NA	NA	NA
hsa-miR-4791	IGFBP5	0.0491006	0.832609	1.29452	0.177581	2.15633	0.00912096	NA	NA	NA	NA
hsa-miR-4791	SIRT1	0.00525622	0.98196	0.945232	0.703658	2.15633	0.00912096	NA	NA	NA	NA
hsa-miR-4791	SOX9	-0.0200665	0.931201	0.862275	0.223147	2.15633	0.00912096	NA	NA	NA	NA
hsa-miR-4791	SMAD2	-0.0759357	0.743557	1.18533	0.0540127	2.15633	0.00912096	NA	NA	NA	NA
hsa-miR-4791	MMP13	-0.0812228	0.726341	0.895583	0.834042	2.15633	0.00912096	NA	NA	NA	NA
hsa-miR-4791	CEBPB	-0.0942172	0.684577	0.939753	0.736829	2.15633	0.00912096	NA	NA	NA	NA
hsa-miR-4791	ADAMTS5	-0.100405	0.664988	1.36417	0.016705	2.15633	0.00912096	NA	NA	NA	NA
hsa-miR-4791	BCL2	-0.114497	0.621169	1.1389	0.259904	2.15633	0.00912096	NA	NA	NA	NA
hsa-miR-4791	COL2A1	-0.176163	0.444956	1.00858	0.986423	2.15633	0.00912096	NA	NA	NA	NA
hsa-miR-4791	VEGFA	-0.366387	0.102349	1.17721	0.27403	2.15633	0.00912096	NA	NA	NA	NA
hsa-miR-4791	TGFB1	-0.43653	0.0478746	0.887273	0.585925	2.15633	0.00912096	NA	NA	NA	NA
hsa-miR-4791	GDF5	-0.513297	0.017322	1.23117	0.309402	2.15633	0.00912096	NA	NA	NA	NA
hsa-miR-483-3p	ACVR2B	0.563314	0.00783552	0.958292	0.798923	0.486484	0.0337236	NA	NA	NA	NA
[truncated: 557 more rows]
